# Supplementary material for: Palladium-catalyzed asymmetric hydrogenation of 3-phthalimido substituted quinolines
Source: Royal Society of Chemistry journal article supplement (doi:10.1039/c4cc04386c), 2014-01-01

## Supporting Information

### Palladium-Catalyzed Asymmetric Hydrogenation of 3-Phthalimido Substituted Quinolines

*Xian-Feng Cai, Wen-Xue Huang, Zhang-Pei Chen and Yong-Gui Zhou\**  
State Key Laboratory of Catalysis, Dalian Institute of Chemical Physics  
Chinese Academy of Sciences, Dalian 116023, P. R. China

#### Table of Contents

|                                                               |     |
|---------------------------------------------------------------|-----|
| 1. General.....                                               | S2  |
| 2. Synthesis of 3-Nitroquinolines.....                        | S2  |
| 3. Synthesis of 3-Phthalimido Substituted Quinolines.....     | S3  |
| 4. Asymmetric Hydrogenation of Substituted Quinolines.....    | S4  |
| 5. Copy of NMR and HPLC for Racemic and Chiral Compounds..... | S10 |

## 1. General:

Commercially available reagents were used without further purification. Solvents were treated prior to use according to the standard methods. <sup>1</sup>H NMR, <sup>13</sup>C NMR and <sup>19</sup>F NMR spectra were recorded at room temperature in CDCl<sub>3</sub> on 400 MHz instrument with tetramethylsilane (TMS) as internal standard. Enantiomeric excess was determined by HPLC analysis, using chiral column described below in detail. Optical rotations were measured by polarimeter. Flash column chromatography was performed on silica gel (200-300 mesh).

## 2. Synthesis of 3-Nitroquinolines

3-Nitroquinoline derivatives can be conveniently synthesized according to the known literature procedure.<sup>[1,2,3]</sup> 2-butyl-3-nitroquinoline (**7a**), 2-methyl-3-nitroquinoline (**7b**), 2-ethyl-3-nitroquinoline (**7c**), 2-propyl-3-nitroquinoline (**7d**), 2-isobutyl-3-nitroquinoline (**7f**), 2-isopentyl-3-nitroquinoline (**7g**), 2-hexyl-3-nitroquinoline (**7h**), 2-phenethyl-3-nitroquinoline (**7i**), 2-phenyl-3-nitroquinoline (**7k**), (*E*)-2-styryl-3-nitroquinoline (**7l**), and (*E*)-2-(4-fluorostyryl)-3-nitroquinoline (**7l**) are known compounds.

### 2.1. Synthesis of 3-Nitroquinoline 7e

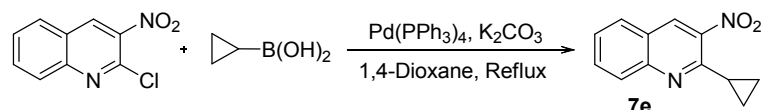

Following a known literature report:<sup>2,3</sup> A mixture of 2-chloro-3-nitroquinoline (150 mg, 0.72 mmol), cyclopropylboronic acid (74 mg, 0.86 mmol), Pd(PPh<sub>3</sub>)<sub>4</sub> (83 mg, 0.07 mmol) and K<sub>2</sub>CO<sub>3</sub> (297 mg, 2.15 mmol) in 1,4-dioxane (6 mL) was stirred at reflux for 18 h, then cooled to rt, diluted with water (15 mL), then extracted with CH<sub>2</sub>Cl<sub>2</sub> (15 mL×3). The combined organic layers were dried with Na<sub>2</sub>SO<sub>4</sub>. After filtration, the solvent was removed under reduced pressure and the residue was purified by flash chromatography on silica gel (hexane/EtOAc 30:1) to yield the product **7e**.

**2-Cyclopropyl-3-nitroquinoline (7e):** 83% yield, white solid, mp 104-106 °C, R<sub>f</sub> = 0.90 (hexane/EtOAc 10:1). <sup>1</sup>H NMR (400 MHz, CDCl<sub>3</sub>) δ = 8.61 (1 H, s), 7.97 (d, *J* = 8.5, 1 H), 7.85

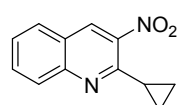

(d, *J* = 8.2, 1 H), 7.82-7.76 (1 H, m), 7.55 (t, *J* = 7.5, 1 H), 2.81-2.70 (1 H, m), 1.43-1.35 (2 H, m), 1.20-1.11 (2 H, m); <sup>13</sup>C NMR (100 MHz, CDCl<sub>3</sub>) δ = 155.6, 148.7, 144.5, 132.5, 132.3, 128.9, 128.6, 127.2, 124.7, 14.0, 11.4; HRMS

Calculated for C<sub>12</sub>H<sub>11</sub>N<sub>2</sub>O<sub>2</sub> [M+H]<sup>+</sup> 215.0821, found 215.0822.

### 2.2. Synthesis of 3-Nitroquinoline 7j

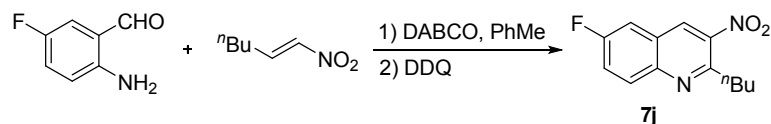

Following a known literature report:<sup>4</sup> To a solution of 2-amino-5-fluorobenzaldehyde (790

1 G. A. Molander and C.-S. Yun, *Tetrahedron* **2002**, *58*, 1465.

2 X.-F. Cai, M.-W. Chen, Z.-S. Ye, R.-N. Guo, L. Shi, Y. Li and Y.-G. Zhou, *Chem. Asian J.* **2013**, *8*, 1381.

3 X.-F. Cai, R.-N. Guo, M.-W. Chen, L. Shi and Y.-G. Zhou, *Chem. Eur. J.* **2014**, DOI:10.1002/chem.201402592.

4 M.-C. Yan, Z. Tu, C. Lin, S. Ko, J. Hsu and C.-F. Yao, *J. Org. Chem.* **2004**, *69*, 1565.

mg, 5.68 mmol) in toluene (25 mL) was added (*E*)-1-nitrohex-1-ene (880 mg, 6.81 mmol). The resulting mixture was placed in an oil bath and heated at 45 °C for 13.5 h, then 1,4-diaza-bicyclo [2.2.2]octane (DABCO, 319 mg, 2.84 mmol) was added, the mixture was stirred for another 12 h. After cooled to room temperature, 2,3-dichloro-5,6-dicyano-1,4-benzoquinone (DDQ, 1.934 g, 8.52 mmol) was added and the solution was vigorously stirred for 0.5 h. After evaporation of the solvent, the residue was purified by flash chromatography on silica gel (hexane/EtOAc 20:1) to yield the product **7j**.

**2-Butyl-6-fluoro-3-nitroquinoline (7j):** 22% yield, light brown oil,  $R_f = 0.70$  (hexane/EtOAc 10:1).  $^1\text{H NMR}$  (400 MHz,  $\text{CDCl}_3$ )  $\delta = 8.63$  (s, 1H), 8.11 (dd,  $J = 9.3, 5.2$ , 1H), 7.66-7.58 (m, 1H), 7.52 (dd,  $J = 8.2, 2.8$ , 1H), 3.27-3.19 (m, 2H), 1.88-1.76 (m, 2H), 1.54-1.42 (m, 2H), 0.98 (t,  $J = 7.4$ , 3H);  $^{13}\text{C NMR}$  (100 MHz,  $\text{CDCl}_3$ )  $\delta = 161.0$  (d,  $^1J_{\text{FC}} = 251.2$ ), 154.8 (d,  $^4J_{\text{FC}} = 2.9$ ), 145.8, 144.5, 132.1 (d,  $^4J_{\text{FC}} = 5.7$ ), 131.7 (d,  $^3J_{\text{FC}} = 9.2$ ), 126.1 (d,  $^3J_{\text{FC}} = 10.5$ ), 122.9 (d,  $^2J_{\text{FC}} = 25.9$ ), 111.5 (d,  $^2J_{\text{FC}} = 22.4$ ), 35.8, 30.9, 22.7, 13.8;  $^{19}\text{F NMR}$  (376 MHz,  $\text{CDCl}_3$ )  $\delta = -111.0$ ; HRMS Calculated for  $\text{C}_{13}\text{H}_{14}\text{N}_2\text{O}_2$   $[\text{M}+\text{H}]^+$  249.1039, found 249.1036.

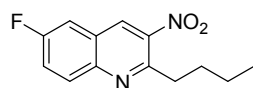

### 3. Synthesis of 3-Phthalimido Substituted Quinolines

Quinolin-3-amines **2** can be conveniently synthesized according to the known literature procedure.<sup>[3]</sup> 2-(2-Butylquinolin-3-yl)isoindoline-1,3-dione (**2a**), 2-(2-methylquinolin-3-yl)isoindoline-1,3-dione (**2b**), 2-(2-ethylquinolin-3-yl)isoindoline-1,3-dione (**2c**), 2-(2-propylquinolin-3-yl)isoindoline-1,3-dione (**2d**), 2-(2-isobutylquinolin-3-yl) isoindoline-1,3-dione (**2f**), 2-(2-isopentyl-quinolin-3-yl)isoindoline-1,3-dione (**2g**), 2-(2-hexyl-quinolin-3-yl)isoindoline-1,3-dione (**2h**), 2-(2-phenethylquinolin-3-yl)isoindoline-1,3-dione (**2i**), 2-(2-phenylquinolin-3-yl)isoindoline-1,3-dione (**2k**), and (*E*)-2-(2-styrylquinolin-3-yl)isoindoline-1,3-dione (**2l**) are known compounds.

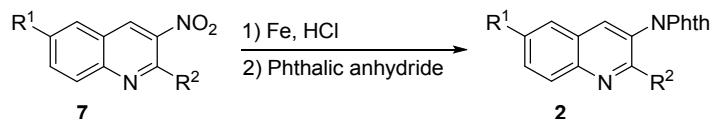

Following a known literature report:<sup>3</sup> To a solution of **7** (0.60 mmol) in a mixed solvent of ethanol and  $\text{H}_2\text{O}$  with a ratio of 4/1 (5.0 mL) was added iron powder (134 mg, 2.40 mmol) followed by HCl (0.1 M, 0.30 mL, 0.03 mmol), and the resulting mixture was vigorously stirred at 85 °C for 0.5-1.5 h. When the reduction reaction was complete (determined by TLC), saturated  $\text{NaHCO}_3$  (5.0 mL) was added and the mixture was filtered through celite. The filtrate was extracted with  $\text{CH}_2\text{Cl}_2$  (15 mL $\times$ 3) and the combined organic layers were dried over  $\text{Na}_2\text{SO}_4$ . After filtration, the solvent was removed under reduced pressure and the crude product was pure enough for further reaction.

In a 25 mL round-bottom flask, the crude product and phthalic anhydride (89 mg, 0.60 mmol) were combined in acetic acid (5.0 mL). The resulting mixture was vigorously stirred at 120 °C for 18 h. The solvent was removed under reduced pressure, the residue was resolved in  $\text{CH}_2\text{Cl}_2$  (10 mL) and washed with saturated  $\text{NaHCO}_3$  (15 mL). The organic layer was dried ( $\text{Na}_2\text{SO}_4$ ). After filtration, the solvent was removed under reduced pressure and the crude product was purified by flash chromatography on silica gel (hexane/EtOAc 5:1) to yield the product.

**2-(2-Cyclopropylquinolin-3-yl)isoindoline-1,3-dione (2e):** 73% yield, white solid, mp 199-201 °C,  $R_f = 0.35$  (hexane/EtOAc 5:1).  $^1\text{H NMR}$  (400 MHz,  $\text{CDCl}_3$ )  $\delta = 8.05$ -7.96 (m, 4H), 7.82

(dd,  $J = 5.3, 3.1, 2\text{H}$ ), 7.77 (d,  $J = 8.0, 1\text{H}$ ), 7.74-7.67 (m, 1H), 7.48 (t,  $J = 7.4, 1\text{H}$ ), 2.06-1.97 (m, 1H), 1.36-1.28 (m, 2H), 1.02-0.93 (m, 2H);  $^{13}\text{C}$  NMR (100 MHz,  $\text{CDCl}_3$ )  $\delta = 167.6, 160.4, 148.2, 136.0, 134.8, 132.1, 130.5, 129.0, 127.8, 126.6, 126.2, 125.2, 124.2, 13.9, 10.2$ ; HRMS Calculated for  $\text{C}_{20}\text{H}_{15}\text{N}_2\text{O}_2$   $[\text{M}+\text{H}]^+$  315.1134, found 315.1141.

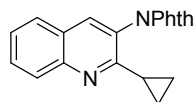

**2-(2-Butyl-6-fluoroquinolin-3-yl)isoindoline-1,3-dione (2j):** 70% yield, white solid, mp 204-206 °C,  $R_f = 0.55$  (hexane/EtOAc 5:1).  $^1\text{H}$  NMR (400 MHz,  $\text{CDCl}_3$ )  $\delta = 8.11$  (dd,  $J = 9.2, 5.2,$

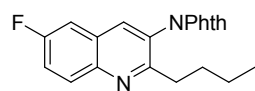

1H), 8.00 (dt,  $J = 6.9, 3.5, 2\text{H}$ ), 7.96 (s, 1H), 7.84 (dd,  $J = 5.2, 3.1, 2\text{H}$ ), 7.52 (td,  $J = 8.9, 2.8, 1\text{H}$ ), 7.41 (dd,  $J = 8.6, 2.6, 1\text{H}$ ), 2.89-2.78 (m, 2H), 1.76 (dt,  $J = 15.4, 7.6, 2\text{H}$ ), 1.40-1.26 (m, 2H), 0.84 (t,  $J = 7.4, 3\text{H}$ );  $^{13}\text{C}$  NMR (100 MHz,  $\text{CDCl}_3$ )  $\delta = 167.3, 160.4$  (d,  $^1J_{\text{FC}} = 248.3$ ), 159.9 (d,  $^4J_{\text{FC}} = 2.9$ ), 145.1, 135.9 (d,  $^4J_{\text{FC}} = 5.4$ ), 134.7, 131.9, 131.5 (d,  $^3J_{\text{FC}} = 9.2$ ), 127.4 (d,  $^3J_{\text{FC}} = 10.3$ ), 125.7, 124.1, 120.6 (d,  $^2J_{\text{FC}} = 25.8$ ), 110.6 (d,  $^2J_{\text{FC}} = 22.1$ ), 34.3, 30.4, 22.6, 13.8;  $^{19}\text{F}$  NMR (376 MHz,  $\text{CDCl}_3$ )  $\delta = -113.5$ ; HRMS Calculated for  $\text{C}_{21}\text{H}_{18}\text{FN}_2\text{O}_2$   $[\text{M}+\text{H}]^+$  349.1352, found 349.1371.

**(E)-2-(2-(4-Fluorostyryl)quinolin-3-yl)isoindoline-1,3-dione (2m):** 64% yield, light yellow solid, mp 269-271 °C,  $R_f = 0.50$  (hexane/EtOAc 5:1).  $^1\text{H}$  NMR (400 MHz,  $\text{CDCl}_3$ )  $\delta = 8.17$  (d,  $J =$

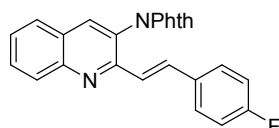

8.5, 1H), 8.10-7.99 (m, 4H), 7.87 (dd,  $J = 5.3, 3.1, 2\text{H}$ ), 7.79 (dd,  $J = 17.1, 8.1, 2\text{H}$ ), 7.54 (t,  $J = 7.5, 1\text{H}$ ), 7.48 (dd,  $J = 8.4, 5.6, 2\text{H}$ ), 6.99 (dd,  $J = 11.9, 6.5, 3\text{H}$ );  $^{13}\text{C}$  NMR (100 MHz,  $\text{CDCl}_3$ )  $\delta = 167.5, 163.2$  (d,  $^1J_{\text{FC}} = 248.8$ ), 152.9, 148.3, 136.8, 135.7, 135.0, 133.0, 132.9, 132.0, 131.0, 129.5, 129.5 (d,  $^3J_{\text{FC}} = 8.3$ ), 127.9, 127.4, 127.0, 124.3, 121.9 (d,  $^4J_{\text{FC}} = 2.1$ ), 115.8 (d,  $^2J_{\text{FC}} = 21.7$ );  $^{19}\text{F}$  NMR (376 MHz,  $\text{CDCl}_3$ )  $\delta = -112.3$ ; HRMS Calculated for  $\text{C}_{25}\text{H}_{16}\text{FN}_2\text{O}_2$   $[\text{M}+\text{H}]^+$  395.1196, found 395.1187.

#### 4. Asymmetric Hydrogenation of Substituted Quinolines

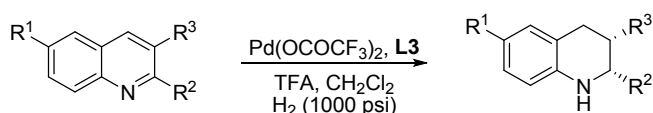

$\text{Pd}(\text{OCOCF}_3)_2$  (1.7 mg, 0.005 mmol) and **L3** (4.7 mg, 0.006 mmol) were placed in a dried Schlenk tube under nitrogen atmosphere, and degassed anhydrous acetone was added. The mixture was stirred at room temperature for 1 h, then, the solvent was removed under vacuum to give the catalyst. In a glovebox, quinolines (0.10 mmol) and TFA (6.8 mg, 4.4  $\mu\text{L}$ , 0.06 mmol) were stirred in 1.0 mL  $\text{CH}_2\text{Cl}_2$  at room temperature for 1 min. Subsequently, the above catalyst together with 3 mL  $\text{CH}_2\text{Cl}_2$  was added to the reaction mixture. The hydrogenation was performed at 70 °C (or 80 °C) under  $\text{H}_2$  (1000 psi) in a stainless steel autoclave for 18 h. After carefully releasing the hydrogen, saturated aqueous  $\text{NaHCO}_3$  (5 mL) was added to the resulting mixture. After stirring for 10 min, the mixture was extracted with  $\text{CH}_2\text{Cl}_2$  (3 x 5 mL) and dried over  $\text{Na}_2\text{SO}_4$ . Purification was performed by flash chromatography on silica gel (hexane/EtOAc 10:1) to give the product.

**2-((2S,3S)-2-Butylquinolin-3-yl)isoindoline-1,3-dione (3a):** known compound,<sup>[31]</sup> 91% yield, 90% ee, light yellow oil,  $[\alpha]_D^{20} = -149.2$  (c 0.60,  $\text{CH}_2\text{Cl}_2$ ) [lit.<sup>[31]</sup>:  $[\alpha]_D^{20} = +181.6$  (c 0.64,  $\text{CH}_2\text{Cl}_2$ )

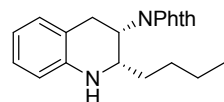

for 93% ee (2R,3R)],  $R_f = 0.60$  (hexane/EtOAc 5:1).  $^1\text{H}$  NMR (400 MHz,  $\text{CDCl}_3$ )  $\delta = 7.87$ -7.79 (m, 2H), 7.75-7.67 (m, 2H), 7.01 (dd,  $J = 15.1, 7.4,$  2H), 6.68 (t,  $J = 7.4, 1\text{H}$ ), 6.57 (d,  $J = 7.9, 1\text{H}$ ), 4.87-4.78 (m, 1H), 4.04 (s,

1H), 3.93 (dd,  $J = 16.6, 9.6$ , 1H), 3.50-3.41 (m, 1H), 3.04 (dd,  $J = 16.6, 6.2$ , 1H), 1.60 (dt,  $J = 13.0, 6.8$ , 1H), 1.50-1.39 (m, 2H), 1.32-1.23 (m, 3H), 0.86 (dd,  $J = 13.5, 6.6$ , 3H);  $^{13}\text{C}$  NMR (100 MHz,  $\text{CDCl}_3$ )  $\delta = 168.8, 143.3, 134.0, 131.8, 129.0, 127.0, 123.2, 120.0, 117.6, 114.5, 54.4, 50.4, 30.3, 28.6, 27.2, 22.7, 14.1$ ; HPLC: Chiracel OD-H column, 254 nm, 30 °C, *n*-hexane/*i*-propanol = 70/30, flow = 0.7 mL/min, retention time 12.2 min and 14.2 min (major).

**2-((2*S*,3*S*)-2-Methylquinolin-3-yl)isoindoline-1,3-dione (3b):** known compound,<sup>[3]</sup> 86% yield, 81% ee, light yellow solid, mp 165-167 °C,  $[\alpha]_{\text{D}}^{20} = -159.2$  ( $c$  0.60,  $\text{CH}_2\text{Cl}_2$ ) [lit.<sup>[3]</sup>:  $[\alpha]_{\text{D}}^{20} =$

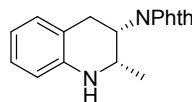

+170.2 ( $c$  0.56,  $\text{CH}_2\text{Cl}_2$ ) for 81% ee (2*R*,3*R*),  $R_f = 0.40$  (hexane/EtOAc 5:1).  $^1\text{H}$  NMR (400 MHz,  $\text{CDCl}_3$ )  $\delta = 7.86$ -7.78 (m, 2H), 7.74-7.67 (m, 2H), 7.02 (t,  $J = 8.6$ , 2H), 6.69 (td,  $J = 7.5, 0.9$ , 1H), 6.55 (d,  $J = 7.9$ , 1H), 4.83-4.76 (m, 1H), 3.91 (dd,  $J = 16.6, 9.2$ , 1H), 3.84 (s, 1H), 3.73-3.65 (m, 1H), 3.06 (dd,  $J = 16.6, 6.4$ , 1H), 1.22 (d,  $J = 6.6$ , 3H);  $^{13}\text{C}$  NMR (100 MHz,  $\text{CDCl}_3$ )  $\delta = 168.8, 143.4, 134.0, 131.8, 128.9, 127.0, 123.2, 119.9, 117.8, 114.5, 50.4, 49.8, 26.8, 17.9$ ; HPLC: Chiracel OD-H column, 254 nm, 30 °C, *n*-hexane/*i*-propanol = 70/30, flow = 0.7 mL/min, retention time 21.7 min and 27.9 min (major).

**2-((2*S*,3*S*)-2-Ethylquinolin-3-yl)isoindoline-1,3-dione (3c):** known compound,<sup>[3]</sup> 93% yield, 85% ee, light yellow solid, mp 162-164 °C,  $[\alpha]_{\text{D}}^{20} = -182.8$  ( $c$  0.56,  $\text{CH}_2\text{Cl}_2$ ) [lit.<sup>[3]</sup>:  $[\alpha]_{\text{D}}^{20} =$

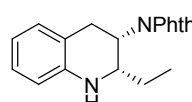

+197.7 ( $c$  0.60,  $\text{CH}_2\text{Cl}_2$ ) for 90% ee (2*R*,3*R*),  $R_f = 0.45$  (hexane/EtOAc 5:1).  $^1\text{H}$  NMR (400 MHz,  $\text{CDCl}_3$ )  $\delta = 7.86$ -7.79 (m, 2H), 7.74-7.68 (m, 2H), 7.01 (dd,  $J = 15.4, 7.5$ , 2H), 6.68 (t,  $J = 7.4$ , 1H), 6.57 (d,  $J = 7.9$ , 1H), 4.88-4.81 (m, 1H), 4.09 (s, 1H), 3.95 (dd,  $J = 16.5, 9.8$ , 1H), 3.36 (dt,  $J = 9.7, 3.7$ , 1H), 3.02 (dd,  $J = 16.5, 6.2$ , 1H), 1.67-1.47 (m, 2H), 0.97 (t,  $J = 7.4$ , 3H);  $^{13}\text{C}$  NMR (100 MHz,  $\text{CDCl}_3$ )  $\delta = 168.8, 143.2, 134.0, 131.8, 129.0, 127.0, 123.2, 120.0, 117.6, 114.5, 56.0, 50.3, 27.1, 23.5, 10.7$ ; HPLC: Chiracel OD-H column, 254 nm, 30 °C, *n*-hexane/*i*-propanol = 70/30, flow = 0.7 mL/min, retention time 13.8 min and 20.5 min (major).

**2-((2*S*,3*S*)-2-Propylquinolin-3-yl)isoindoline-1,3-dione (3d):** known compound,<sup>[3]</sup> 97% yield, 87% ee, light yellow solid, mp 154-156 °C,  $[\alpha]_{\text{D}}^{20} = -186.8$  ( $c$  0.62,  $\text{CH}_2\text{Cl}_2$ ) [lit.<sup>[3]</sup>:  $[\alpha]_{\text{D}}^{20} =$

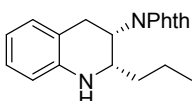

+204.3 ( $c$  0.60,  $\text{CH}_2\text{Cl}_2$ ) for 92% ee (2*R*,3*R*),  $R_f = 0.45$  (hexane/EtOAc 5:1).  $^1\text{H}$  NMR (400 MHz,  $\text{CDCl}_3$ )  $\delta = 7.88$ -7.79 (m, 2H), 7.75-7.67 (m, 2H), 7.01 (dd,  $J = 14.3, 7.3$ , 2H), 6.69 (dd,  $J = 10.7, 4.0$ , 1H), 6.56 (d,  $J = 7.9$ , 1H), 4.86-4.79 (m, 1H), 4.03 (s, 1H), 3.94 (dd,  $J = 16.6, 9.7$ , 1H), 3.47 (dt,  $J = 10.0, 3.2$ , 1H), 3.04 (dd,  $J = 16.6, 6.2$ , 1H), 1.65-1.38 (m, 3H), 1.35-1.23 (m, 1H), 0.89 (t,  $J = 7.1$ , 3H);  $^{13}\text{C}$  NMR (100 MHz,  $\text{CDCl}_3$ )  $\delta = 168.8, 143.2, 134.0, 131.8, 129.0, 127.0, 123.2, 120.0, 117.6, 114.5, 54.1, 50.4, 32.6, 27.2, 19.5, 14.0$ ; HPLC: Chiracel OD-H column, 254 nm, 30 °C, *n*-hexane/*i*-propanol = 70/30, flow = 0.7 mL/min, retention time 12.6 min and 16.6 min (major).

**2-((2*S*,3*S*)-2-Cyclopropylquinolin-3-yl)isoindoline-1,3-dione (3e):** 72% yield, 80% ee, yellow solid, mp 152-154 °C,  $[\alpha]_{\text{D}}^{20} = -197.6$  ( $c$  0.38,  $\text{CH}_2\text{Cl}_2$ ),  $R_f = 0.45$  (hexane/EtOAc 5:1).  $^1\text{H}$

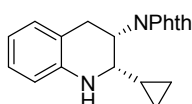

NMR (400 MHz,  $\text{CDCl}_3$ )  $\delta = 7.88$ -7.80 (m, 2H), 7.76-7.67 (m, 2H), 7.07-6.96 (m, 2H), 6.67 (t,  $J = 7.3$ , 1H), 6.56 (d,  $J = 7.9$ , 1H), 4.93-4.85 (m, 1H), 4.17 (dd,  $J = 16.3, 10.5$ , 1H), 4.05 (s, 1H), 3.04 (dd,  $J = 16.3, 5.9$ , 1H), 2.72 (dd,  $J = 9.3, 4.1$ , 1H), 1.20-1.05 (m, 1H), 0.54-0.40 (m, 2H), 0.21-0.11 (m, 1H), 0.06 (dq,  $J = 9.8, 4.7$ , 1H);  $^{13}\text{C}$  NMR (100 MHz,  $\text{CDCl}_3$ )  $\delta = 166.5, 141.0, 131.7, 129.5, 126.6, 124.8, 120.9, 117.5, 115.2, 111.8, 56.8, 47.9, 24.8, 10.9, 1.0, -0.0$ ; HRMS Calculated for  $\text{C}_{20}\text{H}_{19}\text{N}_2\text{O}_2$   $[\text{M}+\text{H}]^+$  319.1447, found 319.1453; HPLC: Chiracel OD-H column, 254 nm, 30 °C, *n*-hexane/*i*-propanol = 70/30,

flow = 0.7 mL/min, retention time 18.9 min and 28.8 min (major).

**2-((2*S*,3*S*)-2-Isobutylquinolin-3-yl)isoindoline-1,3-dione (3f):** known compound,<sup>[3]</sup> 94% yield, 90% ee, light yellow oil,  $[\alpha]^{20}_D = -178.7$  (*c* 0.62, CH<sub>2</sub>Cl<sub>2</sub>) [lit.<sup>[3]</sup>:  $[\alpha]^{20}_D = +203.2$  (*c* 0.66, CH<sub>2</sub>Cl<sub>2</sub>) for 94% ee (2*R*,3*R*)], *R<sub>f</sub>* = 0.65 (hexane/EtOAc 5:1). <sup>1</sup>H NMR (400 MHz, CDCl<sub>3</sub>)  $\delta = 7.87$ -7.78 (m, 2H), 7.76-7.66 (m, 2H), 7.02 (dd, *J* = 14.1, 7.1, 2H), 6.69 (td, *J* = 7.4, 0.9, 1H), 6.57 (d, *J* = 7.8, 1H), 4.85-4.76 (m, 1H), 3.97 (s, 1H), 3.87 (dd, *J* = 16.7, 9.1, 1H), 3.58 (dt, *J* = 10.3, 3.3, 1H), 3.08 (dd, *J* = 16.7, 6.3, 1H), 1.79-1.67 (m, 1H), 1.63-1.54 (m, 1H), 1.25-1.18 (m, 1H), 0.91 (d, *J* = 6.6, 3H), 0.85 (d, *J* = 6.6, 3H); <sup>13</sup>C NMR (100 MHz, CDCl<sub>3</sub>)  $\delta = 168.8, 143.4, 134.0, 131.8, 128.9, 127.0, 123.3, 120.1, 117.7, 114.5, 52.1, 50.5, 39.5, 27.4, 24.6, 23.9, 21.5$ ; HPLC: Chiracel OD-H column, 254 nm, 30 °C, *n*-hexane/*i*-propanol = 70/30, flow = 0.7 mL/min, retention time 10.2 min and 17.4 min (major).

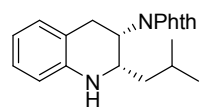

**2-((2*S*,3*S*)-2-Isopentylquinolin-3-yl)isoindoline-1,3-dione (3g):** known compound,<sup>[3]</sup> 91% yield, 90% ee, yellow oil,  $[\alpha]^{20}_D = -184.2$  (*c* 0.64, CH<sub>2</sub>Cl<sub>2</sub>) [lit.<sup>[3]</sup>:  $[\alpha]^{20}_D = +176.8$  (*c* 0.68, CH<sub>2</sub>Cl<sub>2</sub>) for 88% ee (2*R*,3*R*)], *R<sub>f</sub>* = 0.65 (hexane/EtOAc 5:1). <sup>1</sup>H NMR (400 MHz, CDCl<sub>3</sub>)  $\delta = 7.86$ -7.79 (m, 2H), 7.74-7.68 (m, 2H), 7.01 (dd, *J* = 15.5, 7.5, 2H), 6.68 (t, *J* = 7.4, 1H), 6.57 (d, *J* = 7.9, 1H), 4.87-4.78 (m, 1H), 4.03 (s, 1H), 3.90 (dd, *J* = 16.6, 9.4, 1H), 3.42 (dt, *J* = 9.4, 3.6, 1H), 3.04 (dd, *J* = 16.6, 6.2, 1H), 1.63-1.43 (m, 3H), 1.39-1.28 (m, 1H), 1.23-1.12 (m, 1H), 0.82 (dd, *J* = 8.8, 6.7, 6H); <sup>13</sup>C NMR (100 MHz, CDCl<sub>3</sub>)  $\delta = 168.8, 143.3, 134.0, 131.8, 128.9, 127.0, 123.2, 120.1, 117.6, 114.5, 54.8, 50.4, 35.7, 28.6, 28.1, 27.4, 22.8, 22.4$ ; HPLC: Chiracel OD-H column, 254 nm, 30 °C, *n*-hexane/*i*-propanol = 70/30, flow = 0.6 mL/min, retention time 13.2 min and 14.6 min (major).

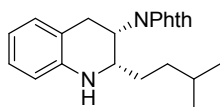

**2-((2*S*,3*S*)-2-Hexylquinolin-3-yl)isoindoline-1,3-dione (3h):** known compound,<sup>[3]</sup> 86% yield, 90% ee, yellow oil,  $[\alpha]^{20}_D = -169.5$  (*c* 0.62, CH<sub>2</sub>Cl<sub>2</sub>) [lit.<sup>[3]</sup>:  $[\alpha]^{20}_D = +180.4$  (*c* 0.70, CH<sub>2</sub>Cl<sub>2</sub>) for 92% ee (2*R*,3*R*)], *R<sub>f</sub>* = 0.70 (hexane/EtOAc 5:1). <sup>1</sup>H NMR (400 MHz, CDCl<sub>3</sub>)  $\delta = 7.82$  (dt, *J* = 7.0, 3.5, 2H), 7.75-7.67 (m, 2H), 7.01 (dd, *J* = 15.0, 7.4, 2H), 6.68 (td, *J* = 7.4, 0.8, 1H), 6.57 (d, *J* = 7.9, 1H), 4.86-4.79 (m, 1H), 4.03 (s, 1H), 3.92 (dd, *J* = 16.6, 9.6, 1H), 3.50-3.41 (m, 1H), 3.04 (dd, *J* = 16.6, 6.2, 1H), 1.59 (dd, *J* = 18.7, 9.4, 1H), 1.51-1.39 (m, 2H), 1.25 (dd, *J* = 14.3, 9.4, 7H), 0.83 (t, *J* = 6.8, 3H); <sup>13</sup>C NMR (100 MHz, CDCl<sub>3</sub>)  $\delta = 168.8, 143.3, 134.0, 131.8, 129.0, 127.0, 123.2, 120.0, 117.6, 114.5, 54.4, 50.4, 31.8, 30.6, 29.2, 27.2, 26.4, 22.6, 14.0$ ; HPLC: Chiracel OD-H column, 254 nm, 30 °C, *n*-hexane/*i*-propanol = 70/30, flow = 0.7 mL/min, retention time 11.3 min and 12.5 min (major).

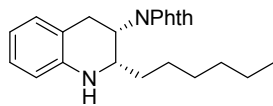

**2-((2*S*,3*S*)-2-Phenethylquinolin-3-yl)isoindoline-1,3-dione (3i):** known compound,<sup>[3]</sup> 95% yield, 90% ee, yellow oil,  $[\alpha]^{20}_D = -147.2$  (*c* 0.72, CH<sub>2</sub>Cl<sub>2</sub>) [lit.<sup>[3]</sup>:  $[\alpha]^{20}_D = +156.0$  (*c* 0.76, CH<sub>2</sub>Cl<sub>2</sub>) for 93% ee (2*R*,3*R*)], *R<sub>f</sub>* = 0.50 (hexane/EtOAc 5:1). <sup>1</sup>H NMR (400 MHz, CDCl<sub>3</sub>)  $\delta = 7.85$ -7.76 (m, 2H), 7.74-7.65 (m, 2H), 7.20 (t, *J* = 7.2, 2H), 7.12 (dd, *J* = 8.9, 7.9, 3H), 7.00 (dd, *J* = 13.1, 7.1, 2H), 6.68 (t, *J* = 7.0, 1H), 6.48 (d, *J* = 7.9, 1H), 4.85-4.77 (m, 1H), 3.94 (dd, *J* = 16.4, 9.9, 2H), 3.49 (dt, *J* = 9.1, 3.4, 1H), 3.03 (dd, *J* = 16.6, 6.2, 1H), 2.84-2.74 (m, 1H), 2.72-2.58 (m, 1H), 2.00-1.79 (m, 2H); <sup>13</sup>C NMR (100 MHz, CDCl<sub>3</sub>)  $\delta = 168.8, 143.0, 141.4, 134.0, 131.8, 129.0, 128.5, 128.4, 127.1, 126.0, 123.3, 120.0, 117.8, 114.7, 54.1, 50.5, 32.9, 32.0, 27.2$ ; HPLC: Chiracel OD-H column, 254 nm, 30 °C, *n*-hexane/*i*-propanol = 70/30, flow = 0.7 mL/min, retention time 20.7 min and 56.5 min (major).

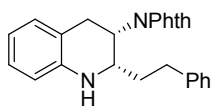

**2-((2*S*,3*S*)-2-Butyl-6-fluoroquinolin-3-yl)isoindoline-1,3-dione (**3j**):** 97% yield, 79% ee, yellow oil,  $[\alpha]_D^{20} = -114.0$  (*c* 0.52, CH<sub>2</sub>Cl<sub>2</sub>), *R<sub>f</sub>* = 0.45 (hexane/EtOAc 5:1). <sup>1</sup>H NMR (400 MHz, CDCl<sub>3</sub>)  $\delta = 7.88-7.78$  (m, 2H), 7.76-7.66 (m, 2H), 6.75 (dd, *J* = 15.0, 6.3, 2H), 6.51 (dd, *J* = 8.4, 4.8, 1H), 4.80 (td, *J* = 7.9, 3.5, 1H), 3.89 (s, 1H), 3.76 (dd, *J* = 17.1, 8.1, 1H), 3.45-3.36 (m, 1H), 3.09 (dd, *J* = 17.1, 6.7, 1H), 1.58-1.39 (m, 3H), 1.35-1.21 (m, 3H), 0.86 (t, *J* = 7.0, 3H); <sup>13</sup>C NMR (100 MHz, CDCl<sub>3</sub>)  $\delta = 168.8, 156.0$  (d, <sup>1</sup>*J*<sub>FC</sub> = 235.5), 139.8, 134.0, 131.8, 123.3, 121.8 (d, <sup>3</sup>*J*<sub>FC</sub> = 7.1), 115.4 (d, <sup>3</sup>*J*<sub>FC</sub> = 7.7), 115.0 (d, <sup>2</sup>*J*<sub>FC</sub> = 22.2), 113.5 (d, <sup>2</sup>*J*<sub>FC</sub> = 22.5), 54.8, 49.8, 30.3, 28.6, 28.0, 22.6, 14.0; <sup>19</sup>F NMR (376 MHz, CDCl<sub>3</sub>)  $\delta = -127.3$ ; HRMS Calculated for C<sub>21</sub>H<sub>22</sub>FN<sub>2</sub>O<sub>2</sub> [M+H]<sup>+</sup> 353.1665, found 353.1656; HPLC: Chiracel OD-H column, 254 nm, 30 °C, *n*-hexane/*i*-propanol = 70/30, flow = 0.7 mL/min, retention time 9.9 min and 14.1 min (major).

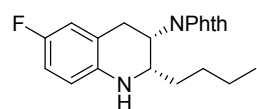

**2-((2*S*,3*S*)-2-Phenylquinolin-3-yl)isoindoline-1,3-dione (**3k**):** known compound,<sup>[3]</sup> 83% yield, 14% ee, light yellow solid, mp 254-256 °C,  $[\alpha]_D^{20} = -39.3$  (*c* 0.60, CH<sub>2</sub>Cl<sub>2</sub>) [lit.<sup>[3]</sup>]:  $[\alpha]_D^{20} = +135.4$  (*c* 0.70, CH<sub>2</sub>Cl<sub>2</sub>) for 40% ee (2*R*,3*R*), *R<sub>f</sub>* = 0.40 (hexane/EtOAc 5:1). <sup>1</sup>H NMR (400 MHz, CDCl<sub>3</sub>)  $\delta = 7.75-7.69$  (m, 2H), 7.69-7.63 (m, 2H), 7.26-7.01 (m, 7H), 6.72 (t, *J* = 7.1, 1H), 6.62 (d, *J* = 7.9, 1H), 4.97 (dt, *J* = 10.4, 5.1, 1H), 4.75 (d, *J* = 4.6, 1H), 4.32 (s, 1H), 3.95 (dd, *J* = 16.3, 10.7, 1H), 3.03 (dd, *J* = 16.3, 5.4, 1H); <sup>13</sup>C NMR (100 MHz, CDCl<sub>3</sub>)  $\delta = 168.1, 143.5, 141.1, 133.9, 131.6, 129.0, 128.3, 127.9, 127.4, 127.3, 123.1, 119.4, 117.5, 113.4, 57.7, 51.1, 26.6$ ; HPLC: Chiracel OD-H column, 254 nm, 30 °C, *n*-hexane/*i*-propanol = 70/30, flow = 0.7 mL/min, retention time 18.7 min and 32.8 min (major).

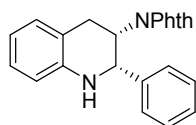

**2-((2*S*,3*S*)-2-Phenethylquinolin-3-yl)isoindoline-1,3-dione (**3i**,** the hydrogenation product is the same as hydrogenation of (*E*)-2-(2-phenethylquinolin-3-yl)isoindoline-1,3-dione (**2i**) due to hydrogenation of C=C double bond of side chain of substrate **2i**): known compound,<sup>[3]</sup> 99% yield, 90% ee, yellow oil, *R<sub>f</sub>* = 0.50 (hexane/EtOAc 5:1). HPLC: Chiracel OD-H column, 254 nm, 30 °C, *n*-hexane/*i*-propanol = 70/30, flow = 0.7 mL/min, retention time 20.7 min and 55.9 min (major).

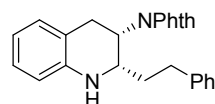

**2-((2*S*,3*S*)-2-(4-fluorophenethyl)-1,2,3,4-tetrahydroquinolin-3-yl)isoindoline-1,3-dione (**3m**):** 86% yield, 88% ee, light yellow oil,  $[\alpha]_D^{20} = -132.2$  (*c* 0.64, CH<sub>2</sub>Cl<sub>2</sub>), *R<sub>f</sub>* = 0.60 (hexane/EtOAc 5:1). <sup>1</sup>H NMR (400 MHz, CDCl<sub>3</sub>)  $\delta = 7.81$  (dt, *J* = 7.0, 3.5, 2H), 7.76-7.65 (m, 2H), 7.12-6.96 (m, 4H), 6.87 (t, *J* = 8.7, 2H), 6.69 (t, *J* = 7.2, 1H), 6.51 (d, *J* = 7.9, 1H), 4.85-4.76 (m, 1H), 3.95 (dd, *J* = 16.5, 10.0, 2H), 3.48 (dt, *J* = 7.2, 3.3, 1H), 3.02 (dd, *J* = 16.6, 6.1, 1H), 2.84-2.71 (m, 1H), 2.69-2.55 (m, 1H), 2.00-1.72 (m, 2H); <sup>13</sup>C NMR (100 MHz, CDCl<sub>3</sub>)  $\delta = 168.8, 161.3$  (d, <sup>1</sup>*J*<sub>FC</sub> = 243.8), 142.9, 137.0 (d, <sup>4</sup>*J*<sub>FC</sub> = 3.2), 134.1, 131.8, 129.7 (d, <sup>3</sup>*J*<sub>FC</sub> = 7.8), 129.0, 127.1, 123.3, 112.0, 117.9, 115.2 (d, <sup>2</sup>*J*<sub>FC</sub> = 21.1), 114.7, 54.0, 50.4, 32.2, 32.0, 27.1; <sup>19</sup>F NMR (376 MHz, CDCl<sub>3</sub>)  $\delta = -117.4$ ; HRMS Calculated for C<sub>25</sub>H<sub>22</sub>FN<sub>2</sub>O<sub>2</sub> [M+H]<sup>+</sup> 401.1665, found 401.1664; HPLC: Chiracel OD-H column, 254 nm, 30 °C, *n*-hexane/*i*-propanol = 70/30, flow = 0.7 mL/min, retention time 21.0 min (major) and 41.2 min

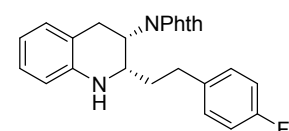

**(*cis*)-Propyl 2-methyl-1,2,3,4-tetrahydroquinoline-3-carboxylate (**8a**):** 52% yield, 35% ee, known compound,<sup>[5]</sup> colorless oil,  $[\alpha]_D^{20} = -13.3$  (*c* 0.24, CH<sub>2</sub>Cl<sub>2</sub>), [lit.<sup>[5]</sup>]:  $[\alpha]_D^{20} = +23.4$  (*c* 1.0,

CHCl<sub>3</sub>) for 85% ee (2*R*,3*R*), R<sub>f</sub> = 0.50 (hexane/EtOAc 10:1). <sup>1</sup>H NMR (400 MHz, CDCl<sub>3</sub>) δ = 6.99 (dd, *J* = 14.6, 7.5, 2H), 6.64 (dd, *J* = 10.7, 4.1, 1H), 6.50 (d, *J* = 7.9, 1H), 4.14-4.02 (m, 2H), 3.98-3.82 (m, 2H), 3.12-3.00 (m, 1H), 3.00-2.87 (m, 2H), 1.72-1.60 (m, 2H), 1.14 (d, *J* = 6.5, 3H), 0.94 (t, *J* = 7.4, 3H); <sup>13</sup>C NMR (100 MHz, CDCl<sub>3</sub>) δ = 173.0, 142.9, 129.5, 127.0, 119.1, 117.4, 114.6, 66.2, 47.4, 42.3, 25.5, 22.0, 17.9, 10.4; HPLC: Chiracel OD-H column, 254 nm, 30 °C, *n*-hexane/*i*-propanol = 70/30, flow = 0.7 mL/min, retention time 7.6 min (major) and 8.2 min.

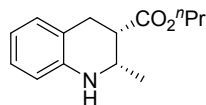

**(*trans*)-Propyl 2-methyl-1,2,3,4-tetrahydroquinoline-3-carboxylate (8b):** 39% yield, 0% ee, colorless oil, R<sub>f</sub> = 0.60 (hexane/EtOAc 10:1). <sup>1</sup>H NMR (400 MHz, CDCl<sub>3</sub>) δ = 6.98 (t, *J* = 7.4, 2H), 6.62 (dd, *J* = 10.7, 4.1, 1H), 6.49 (d, *J* = 7.7, 1H), 4.15-4.05 (m, 2H), 3.68 (s, 1H), 3.54 (dq, *J* = 9.3, 6.2, 1H), 3.05 (dd, *J* = 16.0, 11.4, 1H), 2.91 (dd, *J* = 16.0, 4.9, 1H), 2.53-2.43 (m, 1H), 1.75-1.62 (m, 2H), 1.24 (t, *J* = 5.8, 3H), 0.96 (t, *J* = 7.4, 3H); <sup>13</sup>C NMR (100 MHz, CDCl<sub>3</sub>) δ = 174.4, 143.6, 129.1, 127.1, 119.5, 117.3, 113.8, 66.2, 49.1, 45.8, 30.6, 22.0, 20.6, 10.4; HRMS Calculated for C<sub>14</sub>H<sub>20</sub>NO<sub>2</sub> [M+H]<sup>+</sup> 234.1494, found 234.1497.

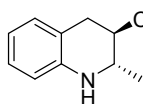

***N*-((*cis*)-2-butyl-1,2,3,4-tetrahydroquinolin-3-yl)-4-methylbenzenesulfonamide (9a):** 11% yield, 51% ee, known compound,<sup>[3]</sup> white solid, mp 164-165 °C, [α]<sub>D</sub><sup>20</sup> = +11.3 (*c* 0.08, CH<sub>2</sub>Cl<sub>2</sub>), [lit.<sup>[3]</sup>: [α]<sub>D</sub><sup>20</sup> = -46.5 (*c* 0.20, CH<sub>2</sub>Cl<sub>2</sub>) for >99% ee (2*S*,3*S*)], R<sub>f</sub> = 0.55 (hexane/EtOAc 5:1). <sup>1</sup>H NMR (400 MHz, CDCl<sub>3</sub>) δ = 7.72 (d, *J* = 8.2, 2H), 7.27 (d, *J* = 8.1, 2H), 6.98 (t, *J* = 7.5, 1H), 6.77 (d, *J* = 7.4, 1H), 6.63 (t, *J* = 7.3, 1H), 6.48 (d, *J* = 7.9, 1H), 4.87 (d, *J* = 9.2, 1H), 3.80-3.69 (m, 1H), 3.60 (s, 1H), 3.19 (t, *J* = 6.5, 1H), 2.87 (dd, *J* = 16.6, 3.9, 1H), 2.57 (dd, *J* = 16.6, 2.1, 1H), 2.42 (s, 3H), 1.46-1.26 (m, 2H), 1.23-1.05 (m, 4H), 0.84 (t, *J* = 6.9, 3H); <sup>13</sup>C NMR (100 MHz, CDCl<sub>3</sub>) δ = 143.5, 143.2, 138.8, 130.5, 129.6, 127.3, 127.0, 118.5, 117.8, 114.2, 54.8, 48.4, 34.3, 31.7, 27.7, 22.6, 21.5, 13.9; HPLC: Chirapak AD-H column, 254 nm, 30 °C, *n*-hexane/*i*-propanol = 80/20, flow = 0.9 mL/min, retention time 11.6 min and 13.2 min (major).

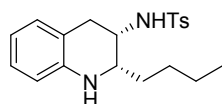

***N*-((*trans*)-2-butyl-1,2,3,4-tetrahydroquinolin-3-yl)-4-methylbenzenesulfonamide (9b):** 22% yield, 9% ee, known compound,<sup>[3]</sup> colorless oil, R<sub>f</sub> = 0.50 (hexane/EtOAc 5:1). <sup>1</sup>H NMR (400 MHz, CDCl<sub>3</sub>) δ = 7.72 (d, *J* = 8.3, 2H), 7.28 (d, *J* = 8.1, 2H), 6.98 (t, *J* = 7.3, 1H), 6.78 (d, *J* = 7.4, 1H), 6.61 (td, *J* = 7.4, 0.8, 1H), 6.47 (d, *J* = 8.0, 1H), 4.92 (d, *J* = 9.3, 1H), 3.98 (s, 1H), 3.62 (td, *J* = 8.0, 3.6, 1H), 3.06-2.95 (m, 1H), 2.82 (dd, *J* = 16.7, 4.5, 1H), 2.53-2.39 (m, 4H), 1.36-1.17 (m, 6H), 0.84 (t, *J* = 7.0, 3H); <sup>13</sup>C NMR (100 MHz, CDCl<sub>3</sub>) δ = 143.3, 142.0, 138.6, 130.3, 129.7, 127.5, 126.9, 117.7, 116.5, 114.3, 55.0, 49.0, 33.8, 29.7, 27.7, 22.4, 21.5, 13.9; HPLC: Chirapak AD-H column, 254 nm, 30 °C, *n*-hexane/*i*-propanol = 75/25, flow = 0.8 mL/min, retention time 10.5 min (major) and 12.3 min.

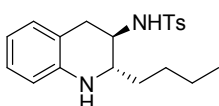

**Methyl 2-methyl-1,2,3,4-tetrahydroquinoline-6-carboxylate (10):** known compound (CAS: 1389882-44-3), 48% yield, 27% ee, white solid, mp 68-70 °C, [α]<sub>D</sub><sup>20</sup> = -34.2 (*c* 0.12, CH<sub>2</sub>Cl<sub>2</sub>), R<sub>f</sub> = 0.55 (hexane/EtOAc 5:1). <sup>1</sup>H NMR (400 MHz, CDCl<sub>3</sub>) δ = 7.68-7.61 (m, 2H), 6.39 (d, *J* = 8.8, 1H), 4.14 (s, 1H), 3.83 (s, 3H), 3.53-3.43 (m, 1H), 2.87-2.70 (m, 2H), 1.99-1.90 (m, 1H), 1.63-1.51 (m, 1H), 1.23 (d, *J* = 6.3, 3H); <sup>13</sup>C NMR (100 MHz, CDCl<sub>3</sub>) δ = 167.5, 148.7, 131.1, 129.1, 119.7, 117.7, 112.6, 51.4, 47.2,

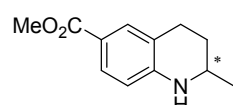



29.5, 26.3, 22.4; HPLC: Chiracel OD-H column, 254 nm, 30 °C, *n*-hexane/*i*-propanol = 85/15, flow = 0.7 mL/min, retention time 12.3 min and 15.0 min (major).

## 5. Copy of NMR and HPLC for racemic and chiral compounds

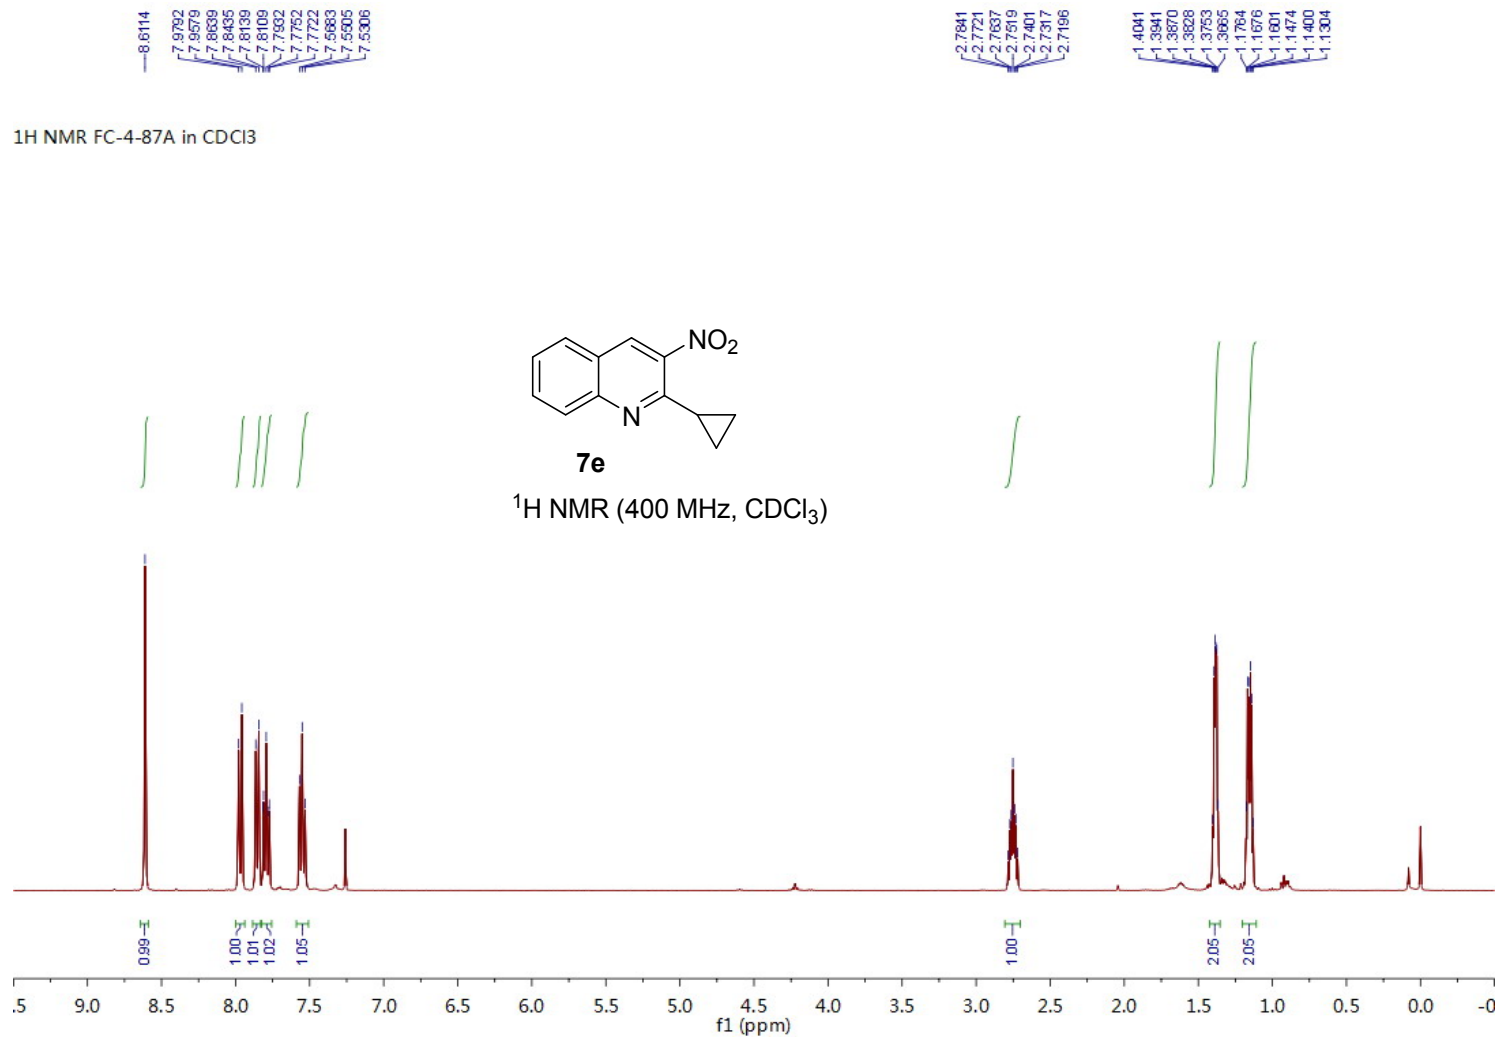

<sup>13</sup>C NMR FC-4-87 in CDCl<sub>3</sub>  
//Yzc/g/新 NMR 2014/2841/fid

155.61  
148.71  
144.49  
132.49  
132.27  
128.91  
128.62  
127.19  
124.74  
14.02  
11.36

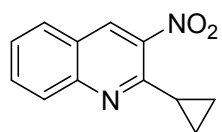

**7e**

<sup>13</sup>C NMR (100 MHz, CDCl<sub>3</sub>)

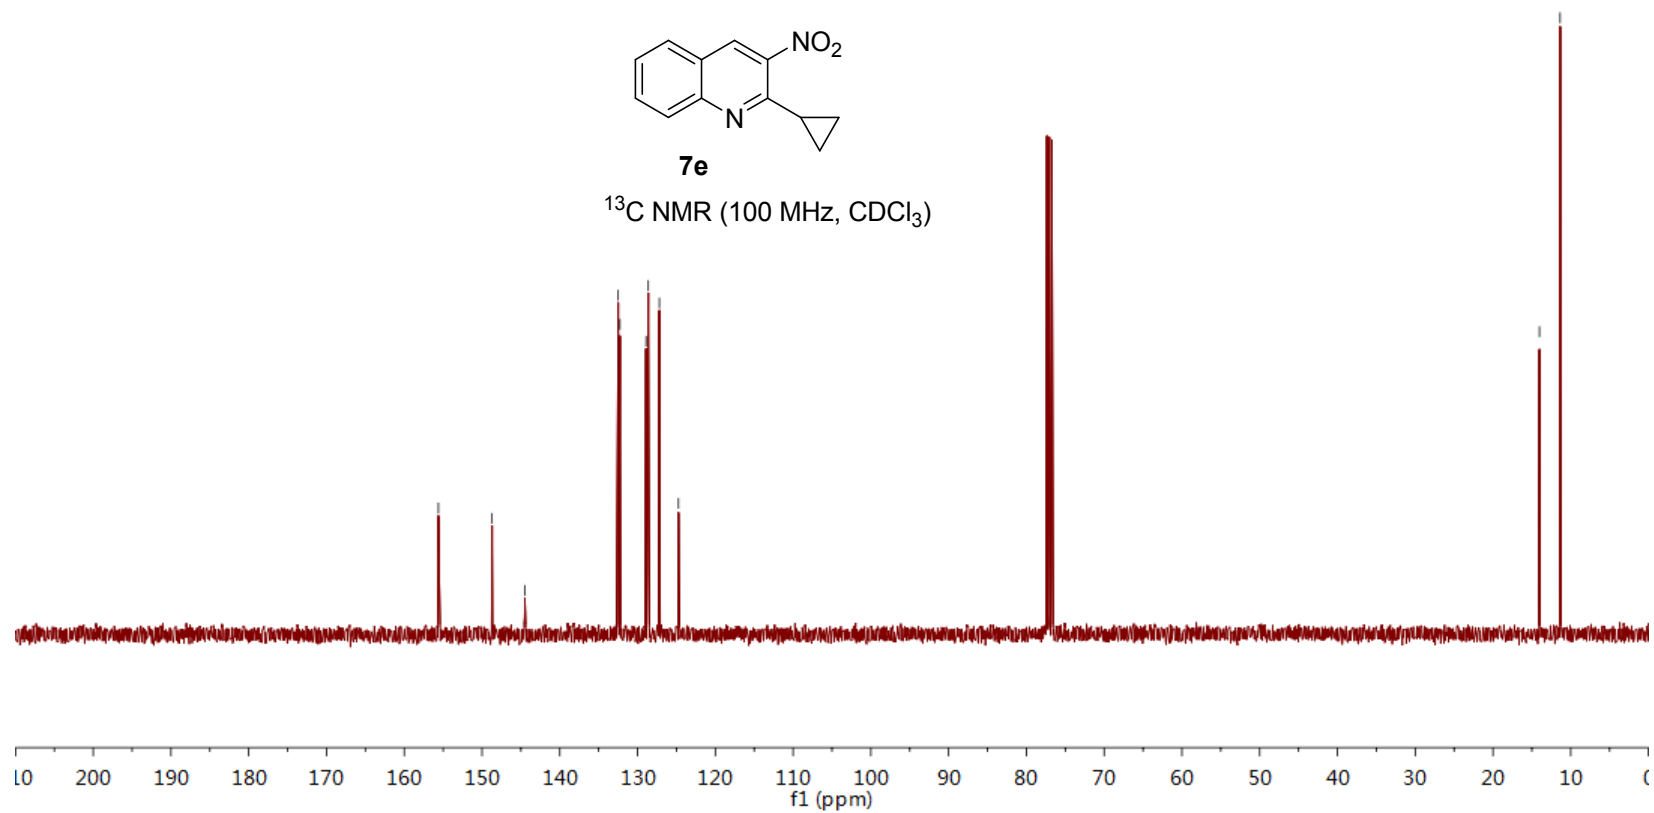

8.6295  
8.1307  
8.1178  
8.1075  
8.0946  
7.8448  
7.6378  
7.6241  
7.6217  
7.6171  
7.6148  
7.6011  
7.5941  
7.5374  
7.5305  
7.5169  
7.5089

3.2457  
3.2282  
3.2063  
1.8545  
1.8301  
1.8069  
1.8313  
1.8224  
1.8160  
1.8087  
1.7971  
1.7921  
1.7776  
1.5037  
1.4880  
1.4683  
1.4518  
0.9791  
0.9577

<sup>1</sup>H NMR FC-6-36 in CDCl<sub>3</sub>  
//Yzc/G/新 NMR 2013/1236/fid

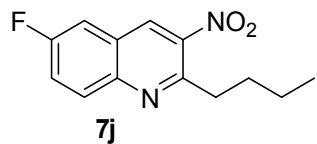

<sup>1</sup>H NMR (400 MHz, CDCl<sub>3</sub>)

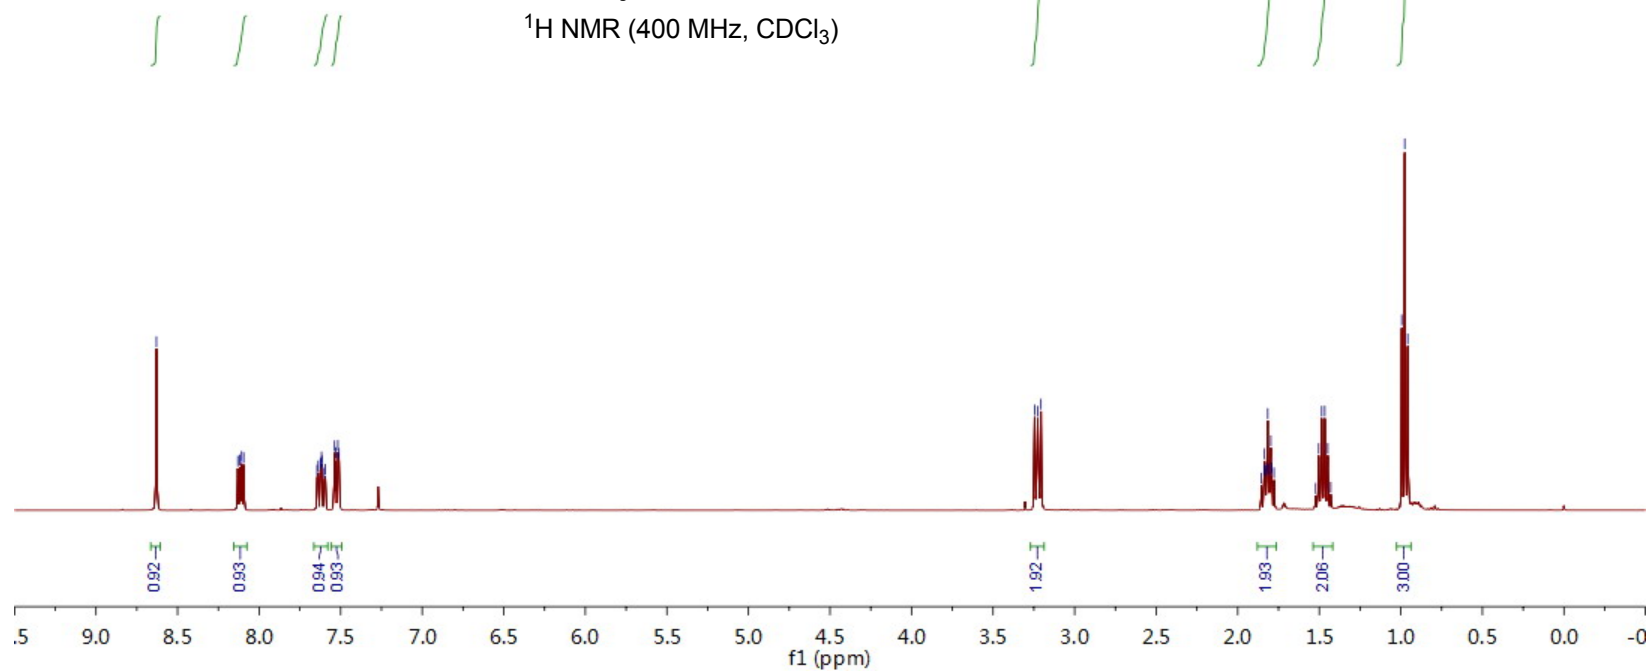

162.23  
159.74  
154.81  
154.78  
145.81  
144.50  
132.12  
132.06  
131.76  
131.67  
126.11  
126.00  
123.06  
122.80  
111.62  
111.40

35.77  
30.94  
22.71  
13.81

<sup>13</sup>C NMR FC-6-36 in CDCl<sub>3</sub>  
//Yzc/G/新 NMR 2013/1238/fid

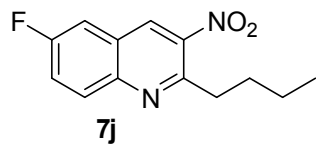

<sup>13</sup>C NMR (100 MHz, CDCl<sub>3</sub>)

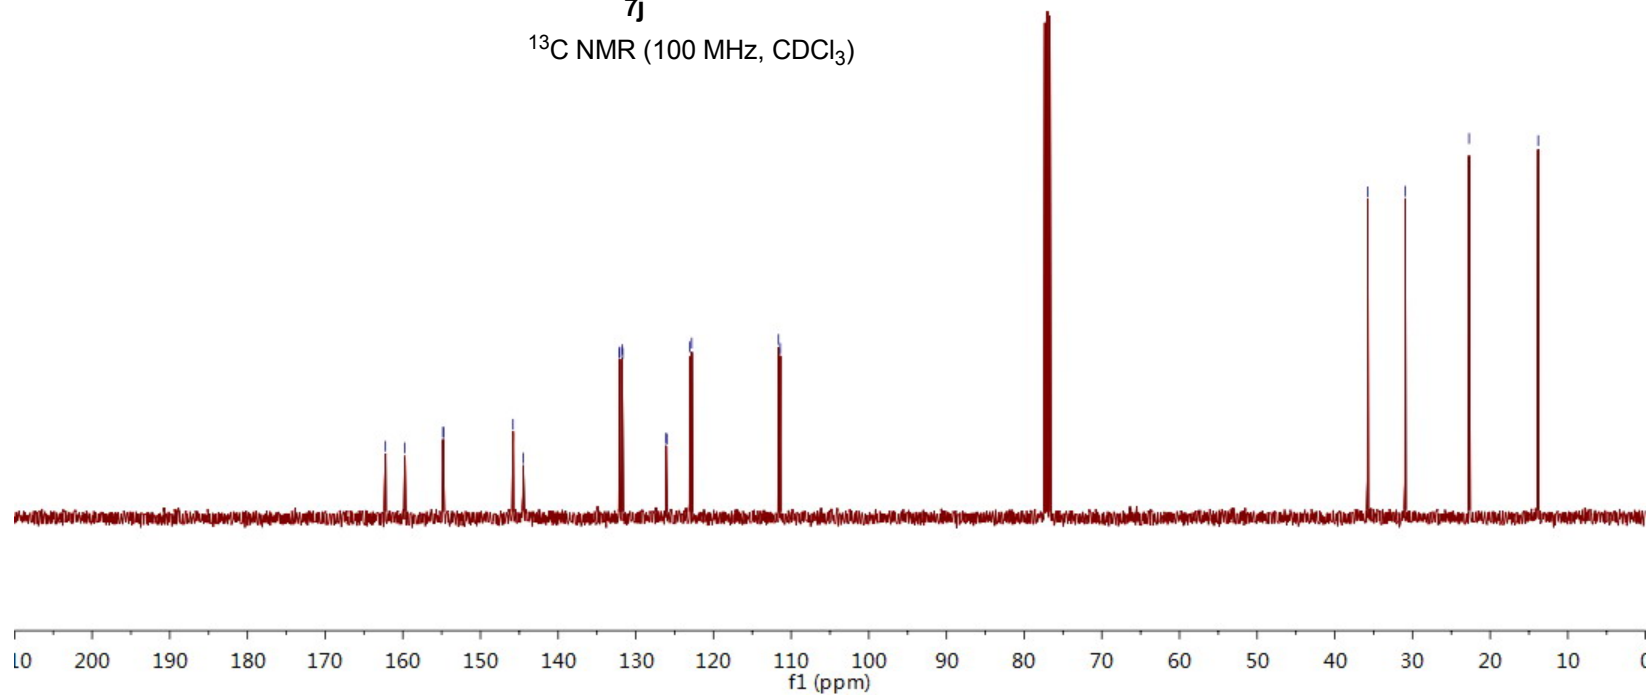

19F NMR FC-6-36 in CDCl3  
//Yzc/G/新 NMR 2013/1237/fid

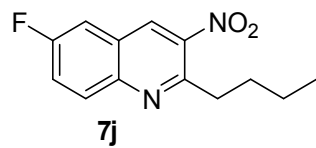

<sup>19</sup>F NMR (376 MHz, CDCl<sub>3</sub>)

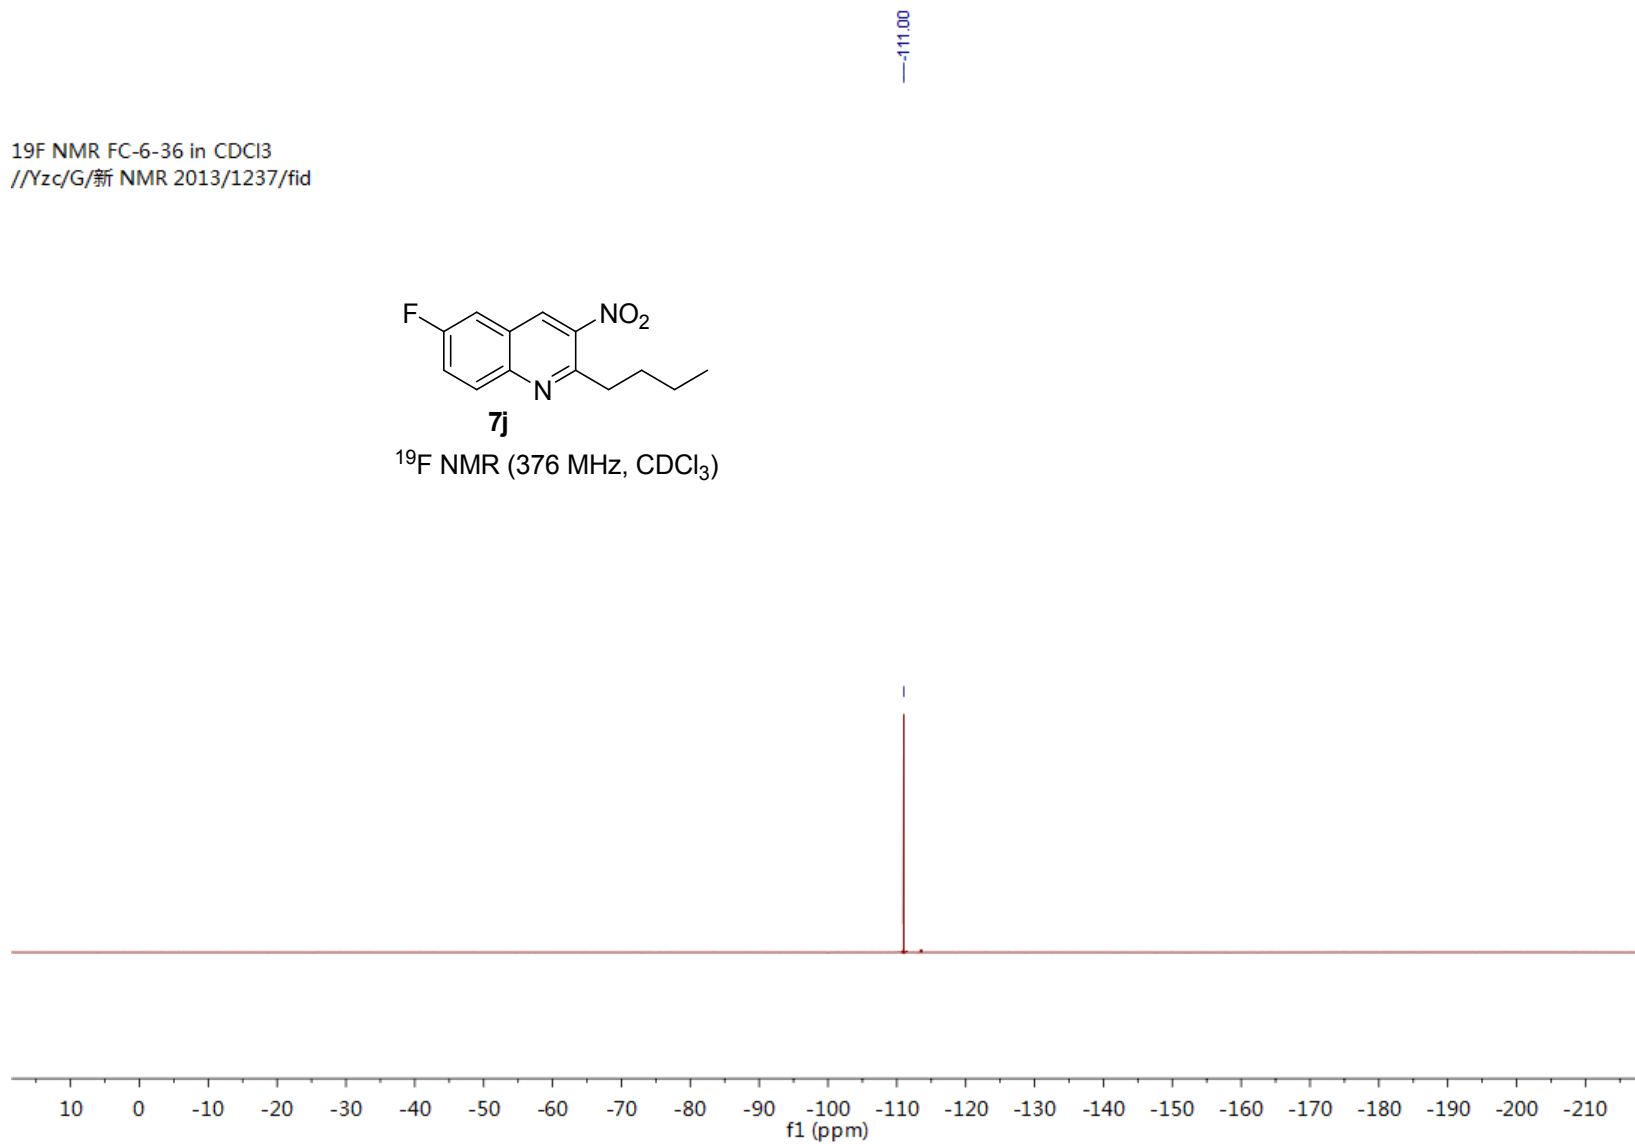

8.0220  
8.0055  
7.9945  
7.9886  
7.9766  
7.8313  
7.8238  
7.8181  
7.8104  
7.7845  
7.7645  
7.7307  
7.7260  
7.7101  
7.6921  
7.6882  
7.5005  
7.4819  
7.4634

2.0468  
2.0452  
2.0330  
2.0245  
2.0127  
2.0008  
1.9924  
1.9805  
1.3280  
1.3211  
1.3164  
1.3094  
0.9878  
0.9886  
0.9815  
0.9683  
0.9612  
0.9514

<sup>1</sup>H NMR FC-4-99B in CDCl<sub>3</sub>

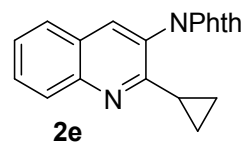

<sup>1</sup>H NMR (400 MHz, CDCl<sub>3</sub>)

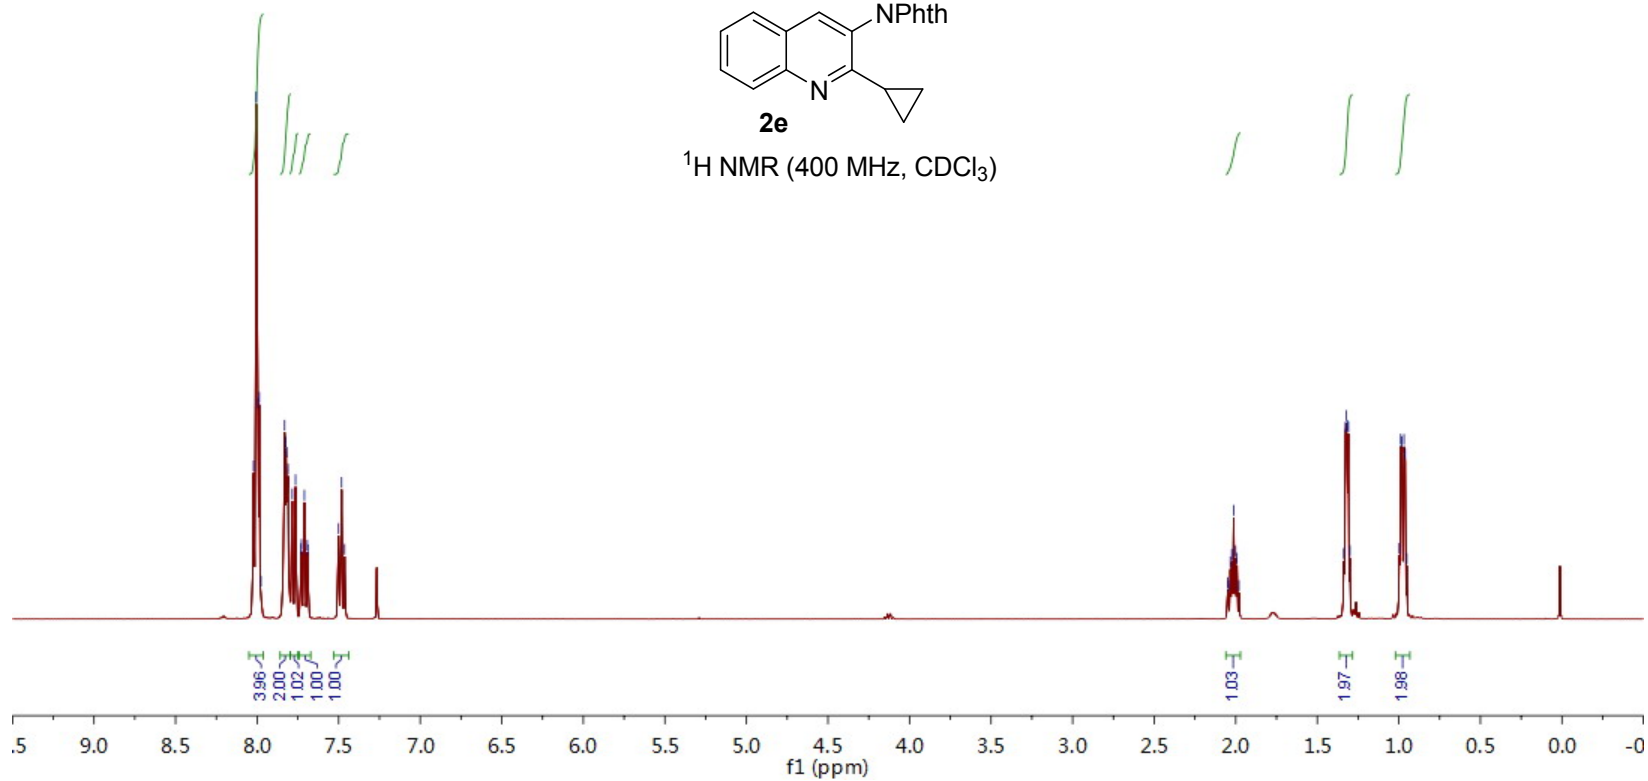

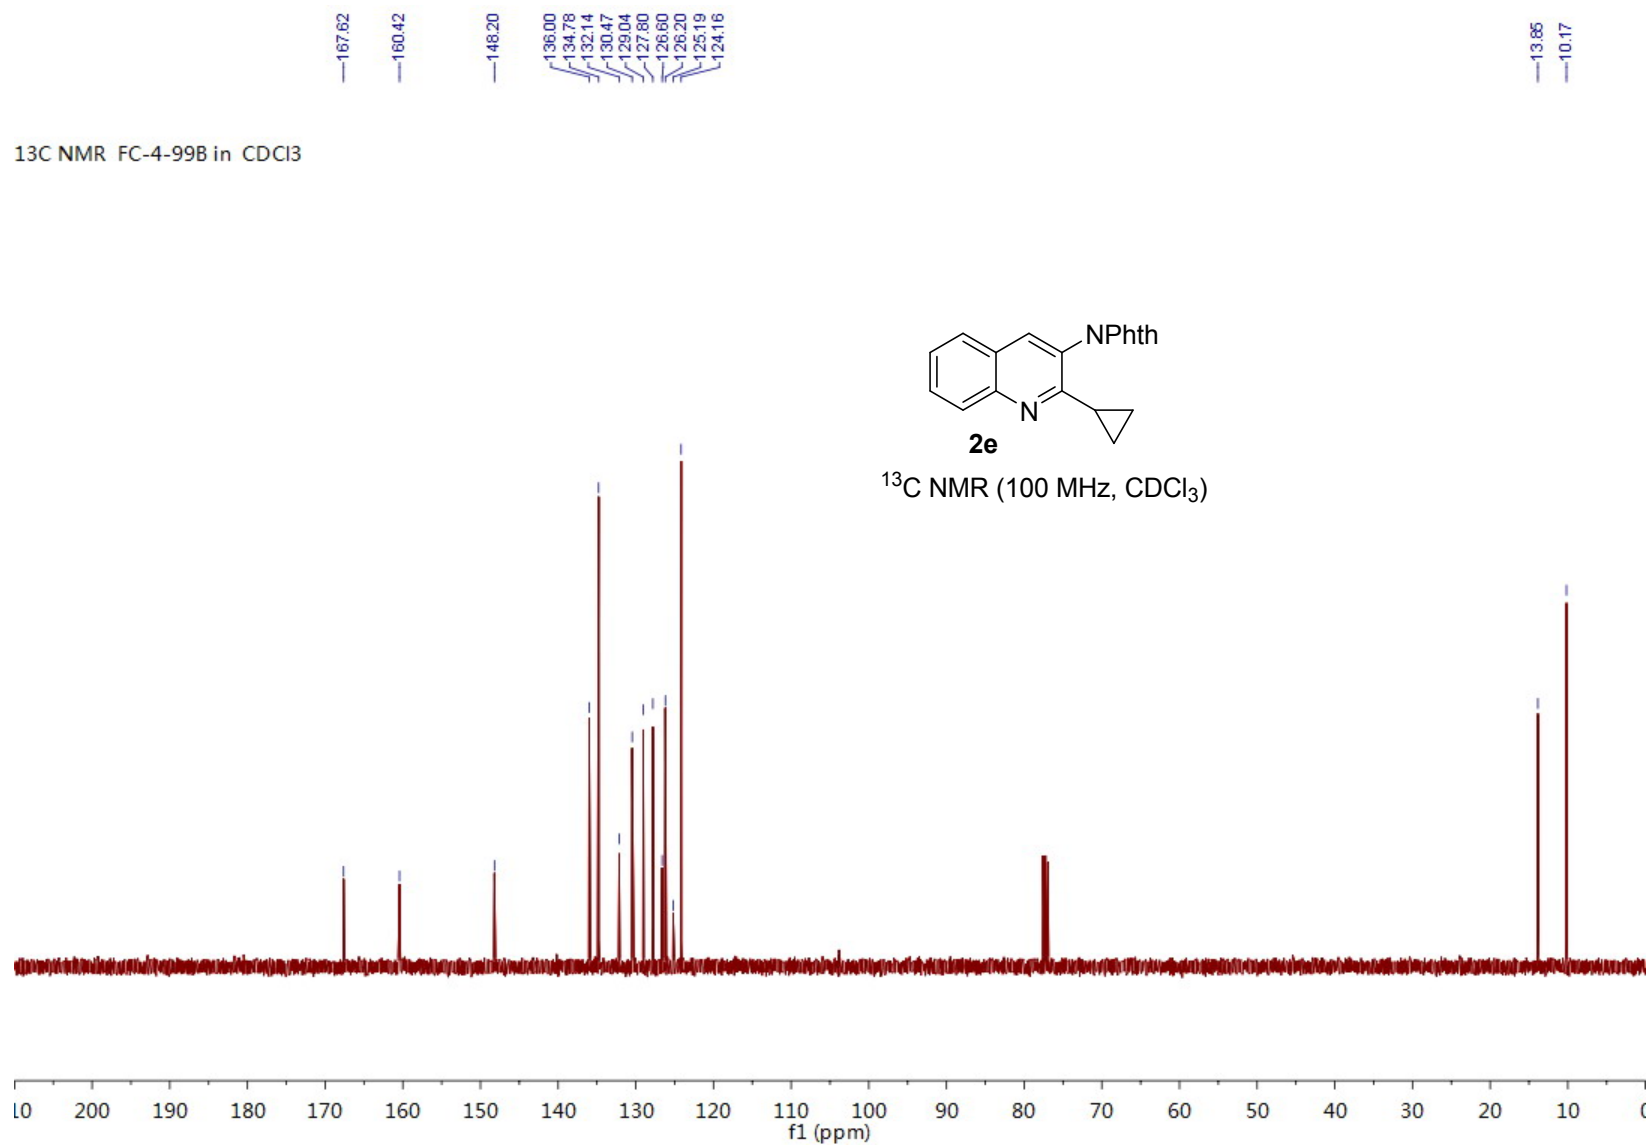



8.1258  
8.1127  
8.1027  
8.0896  
8.0096  
8.0018  
7.9962  
7.9886  
7.9790  
7.9593  
7.8545  
7.8468  
7.8414  
7.8337  
7.5436  
7.5367  
7.5215  
7.5150  
7.4997  
7.4928  
7.4236  
7.4170  
7.4020  
7.3964

2.8527  
2.8333  
2.8133

1.7992  
1.7804  
1.7608  
1.7418  
1.7224  
1.3573  
1.3387  
1.3200  
1.3015  
0.8867  
0.8404  
0.8220

<sup>1</sup>H NMR FC-6-40 in CDCl<sub>3</sub>  
//Yzc/g/新 NMR 2013/1274/fid

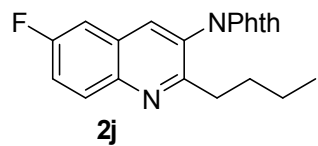

<sup>1</sup>H NMR (400 MHz, CDCl<sub>3</sub>)

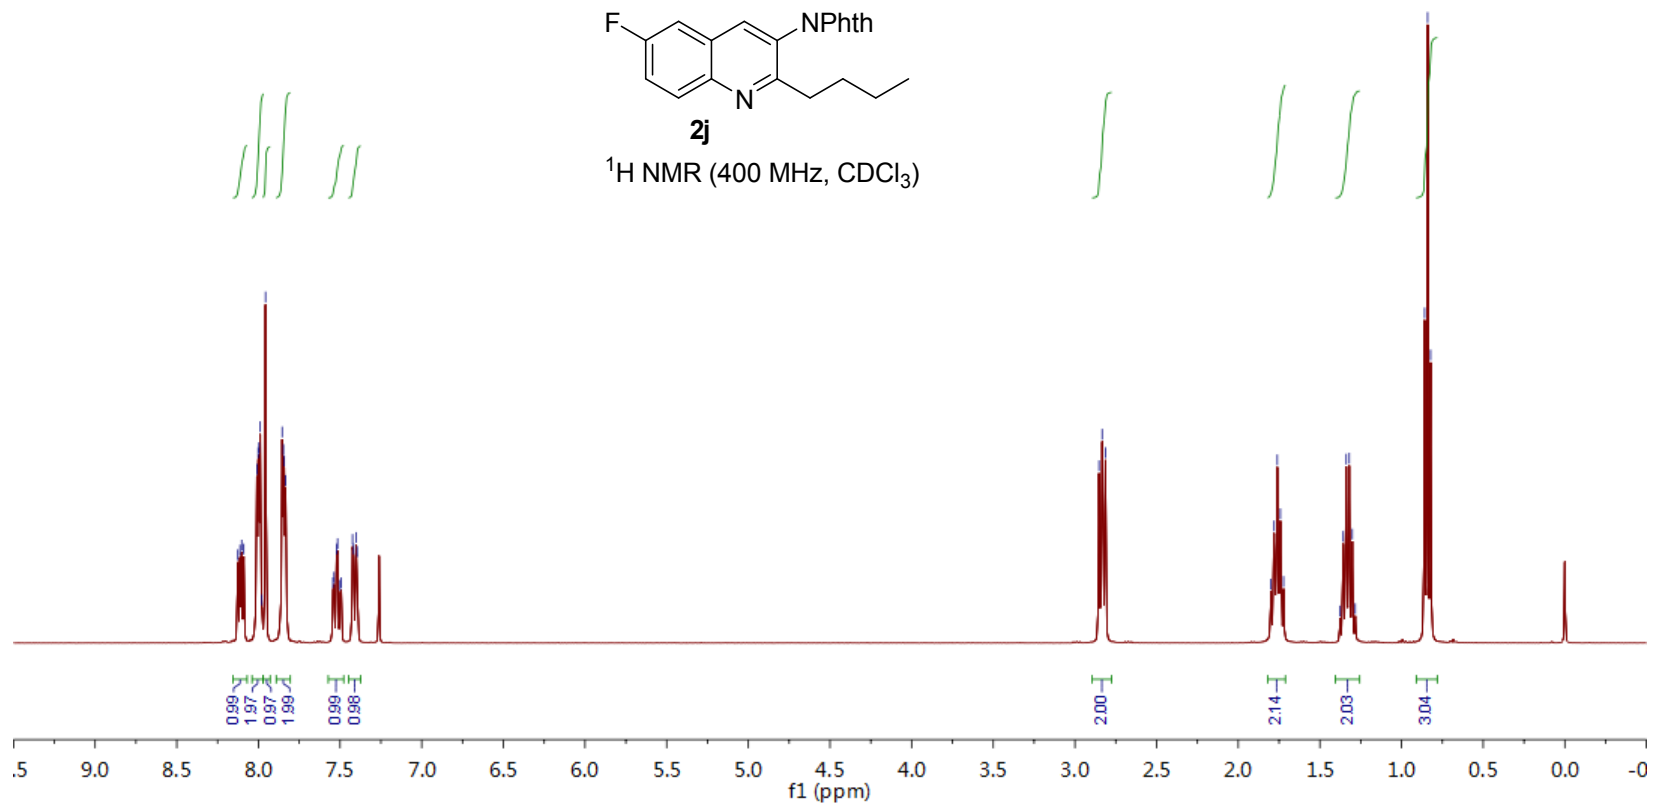

167.30  
161.65  
159.89  
159.86  
159.18

145.14  
135.88  
135.63  
134.71  
131.86  
131.55  
131.46  
127.32  
125.67  
124.05  
120.73  
120.48  
110.68  
110.46

34.26  
30.43  
22.80  
13.81

<sup>13</sup>C NMR FC-6-40 in CDCl<sub>3</sub>  
//Yzc/g/新 NMR 2013/1276/fid

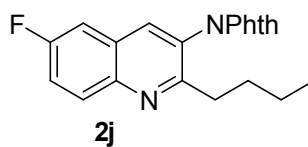

<sup>13</sup>C NMR (100 MHz, CDCl<sub>3</sub>)

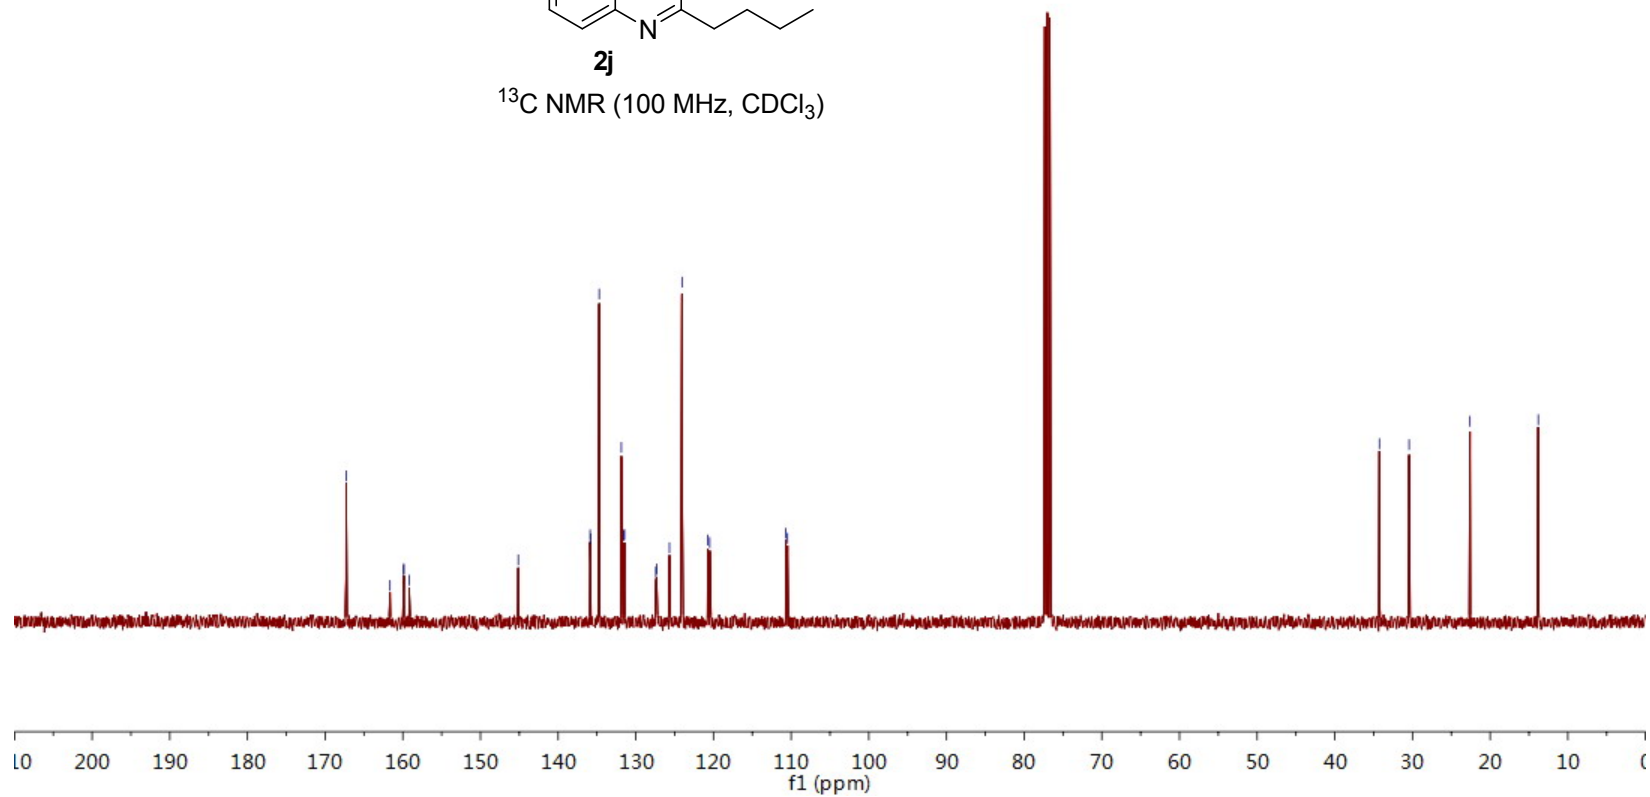

<sup>19</sup>F NMR FC-6-40 in CDCl<sub>3</sub>  
//Yzc/g/新 NMR 2013/1275/fid

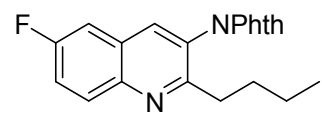

**2j**  
<sup>19</sup>F NMR (376 MHz, CDCl<sub>3</sub>)

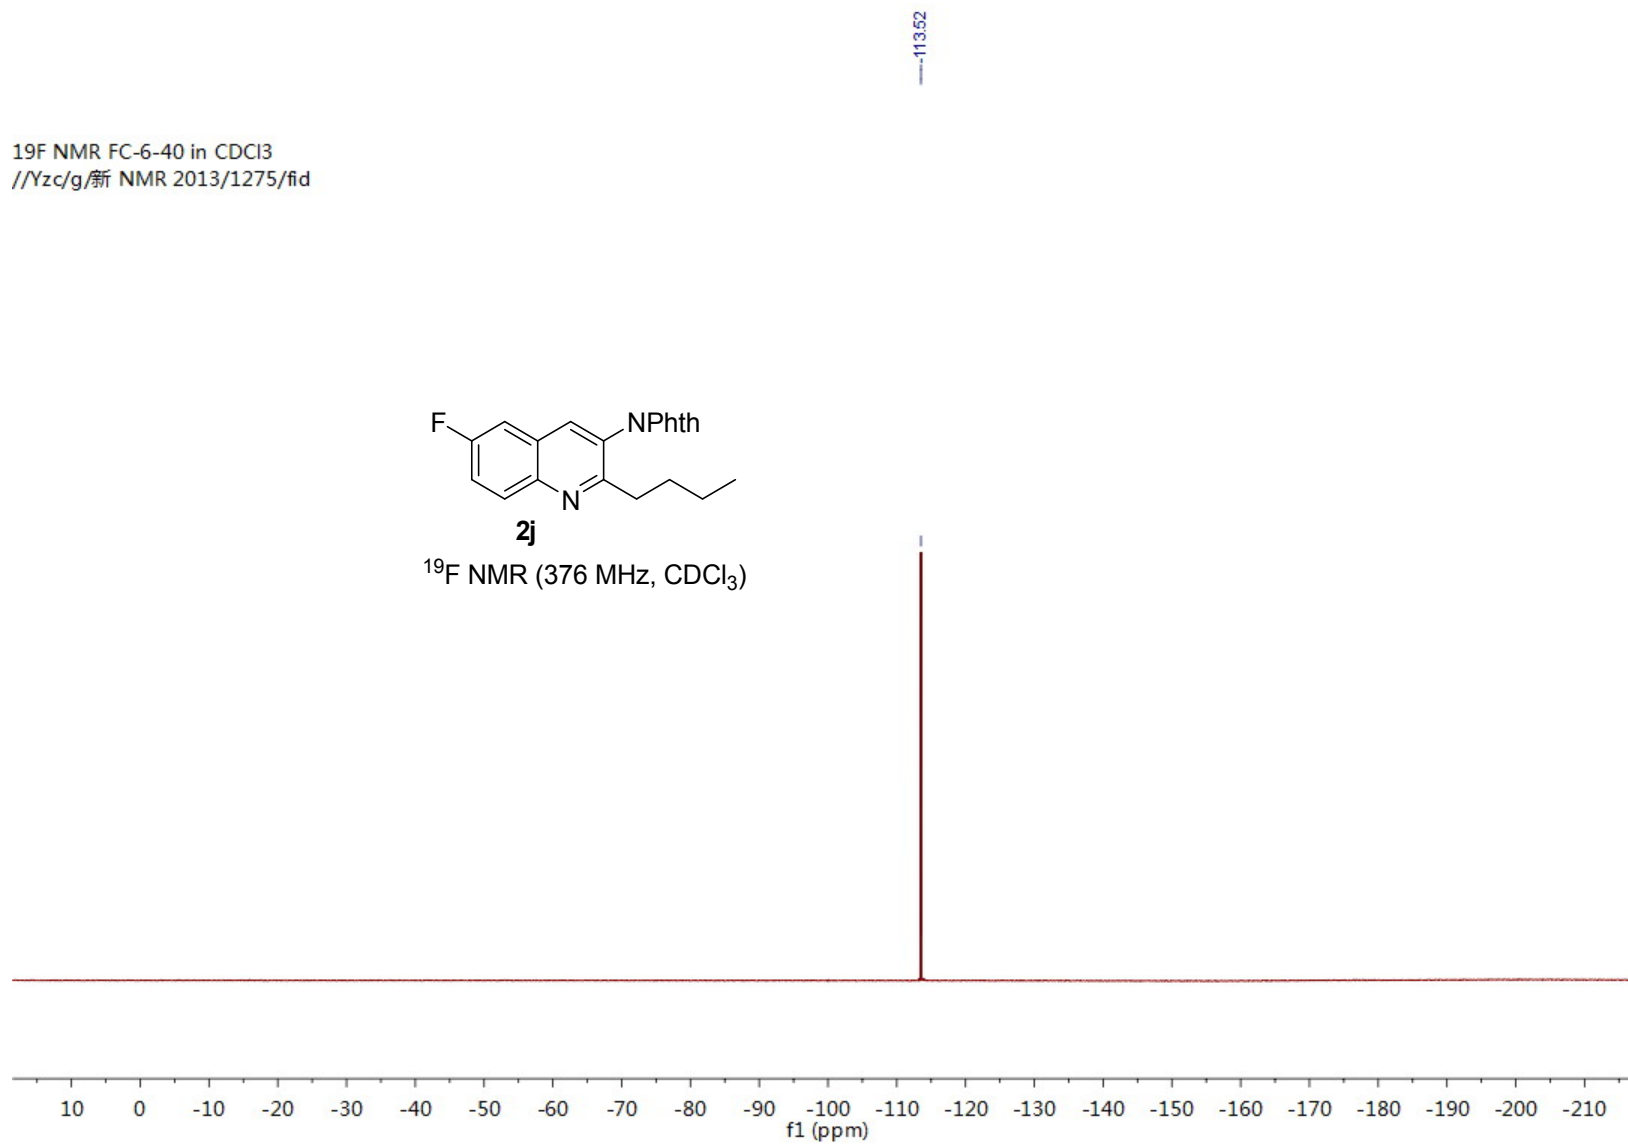

8.1789  
8.1576  
8.0889  
8.0396  
8.0389  
8.0273  
8.0194  
7.8762  
7.8685  
7.8629  
7.8553  
7.8225  
7.8007  
7.7781  
7.5419  
7.4927  
7.4788  
7.4716  
7.4559  
6.9911  
6.9775  
6.9689

<sup>1</sup>H NMR FC-5-46 in CDCl<sub>3</sub>  
//Yzc/g/新 NMR 2013/1263/fid

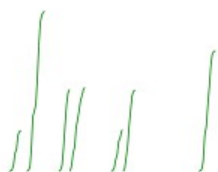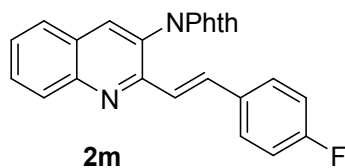

<sup>1</sup>H NMR (400 MHz, CDCl<sub>3</sub>)

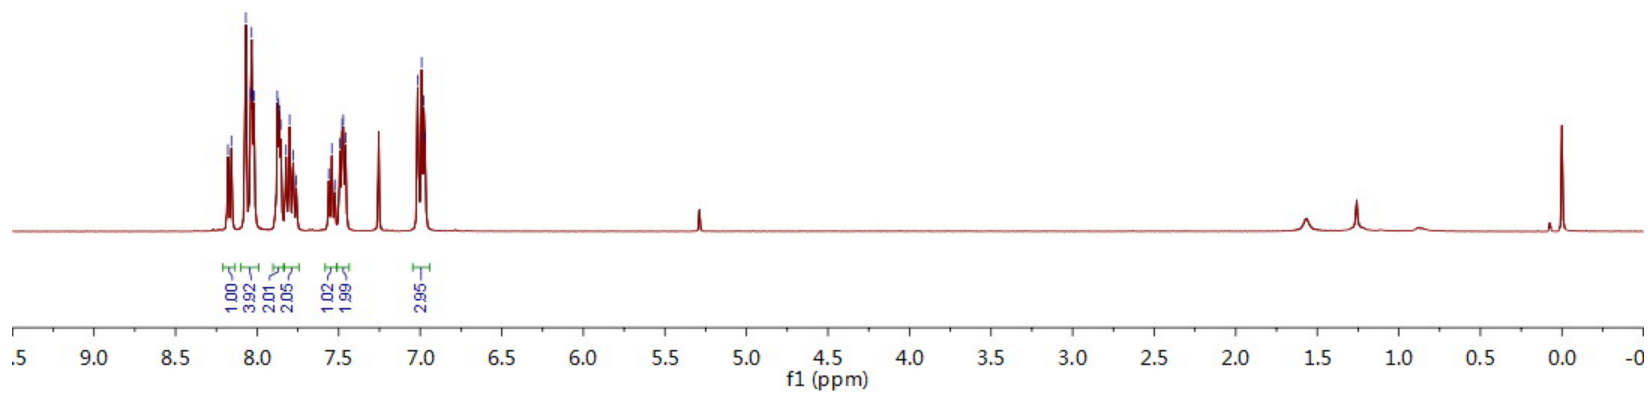

167.50  
 164.42  
 161.95  
 152.88  
 148.28  
 136.84  
 135.74  
 134.95  
 132.03  
 130.96  
 129.51  
 129.49  
 129.40  
 127.86  
 126.98  
 124.32  
 121.90  
 115.89

<sup>13</sup>C NMR FC-5-46 in CDCl<sub>3</sub>

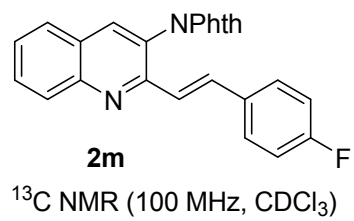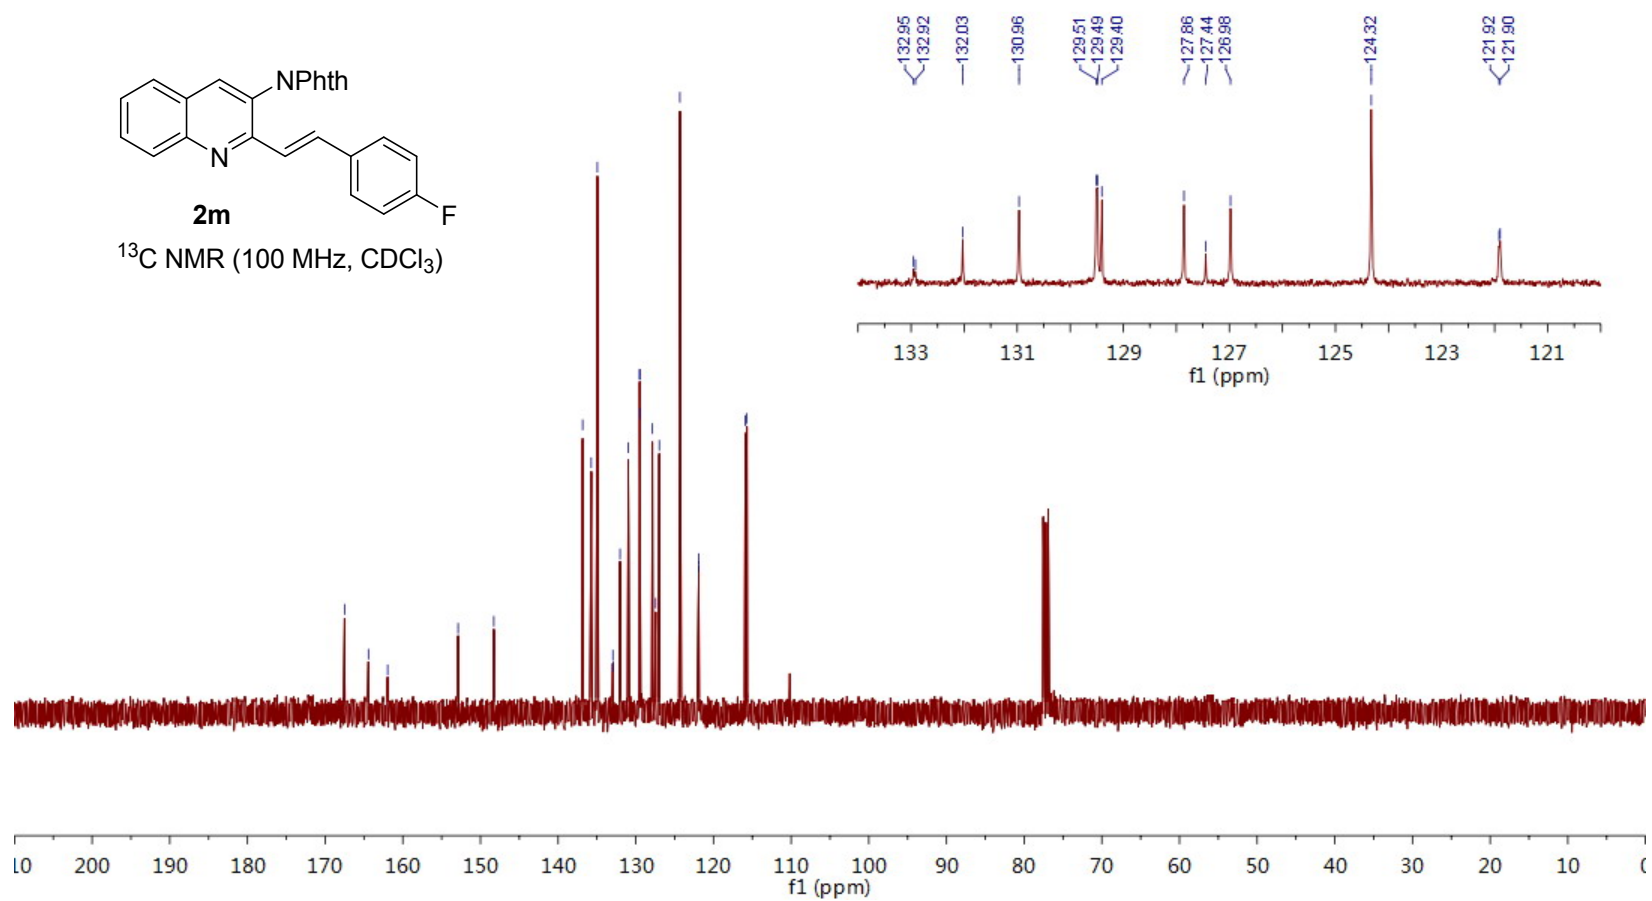

FNMR-2013-FC-5-46 in CDCl<sub>3</sub>

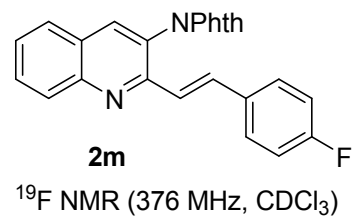

—112.30

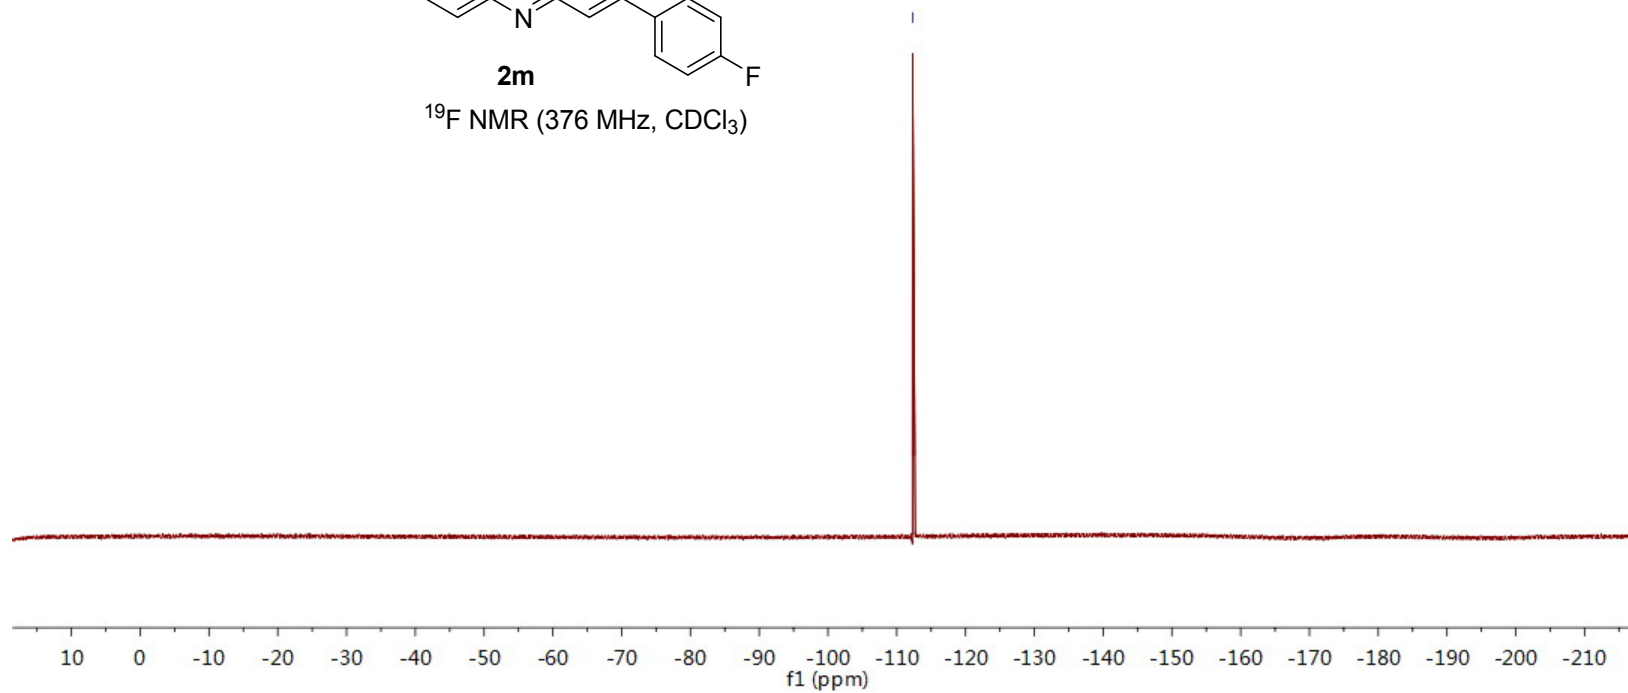

<sup>1</sup>H NMR FC-6-19B in CDCl<sub>3</sub>  
G:/新 NMR 2013/956/fid

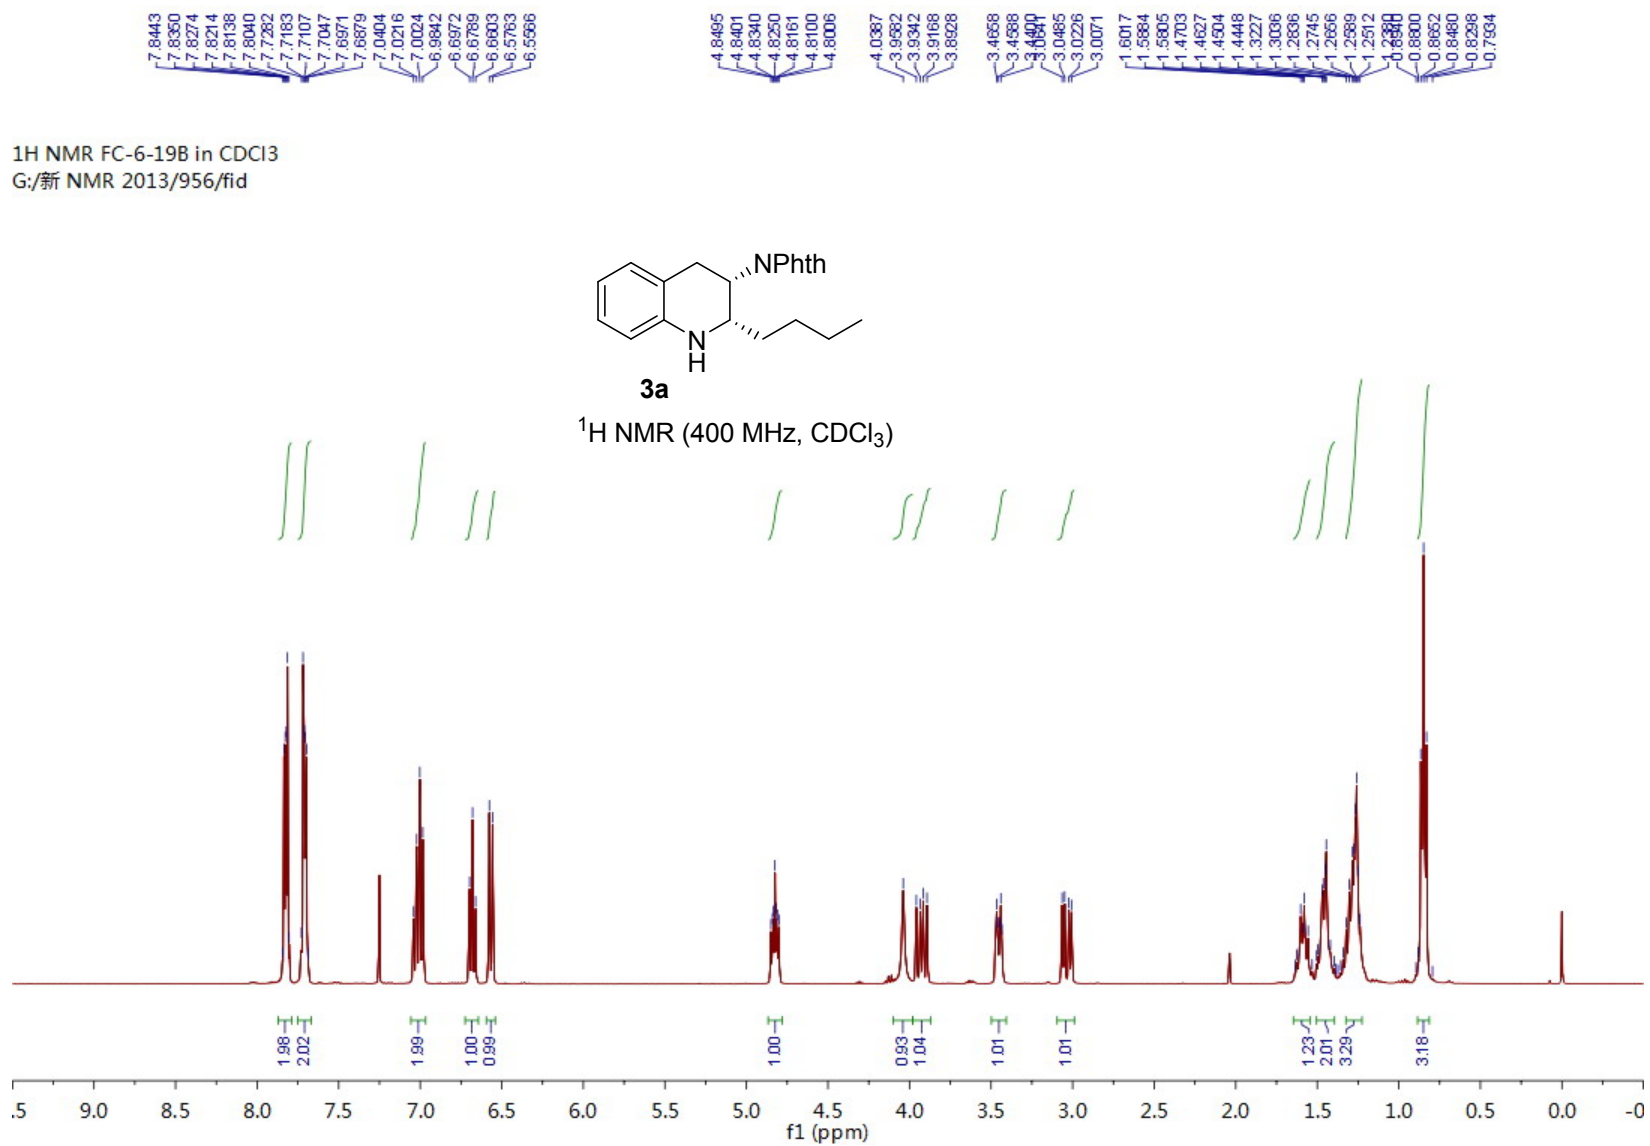

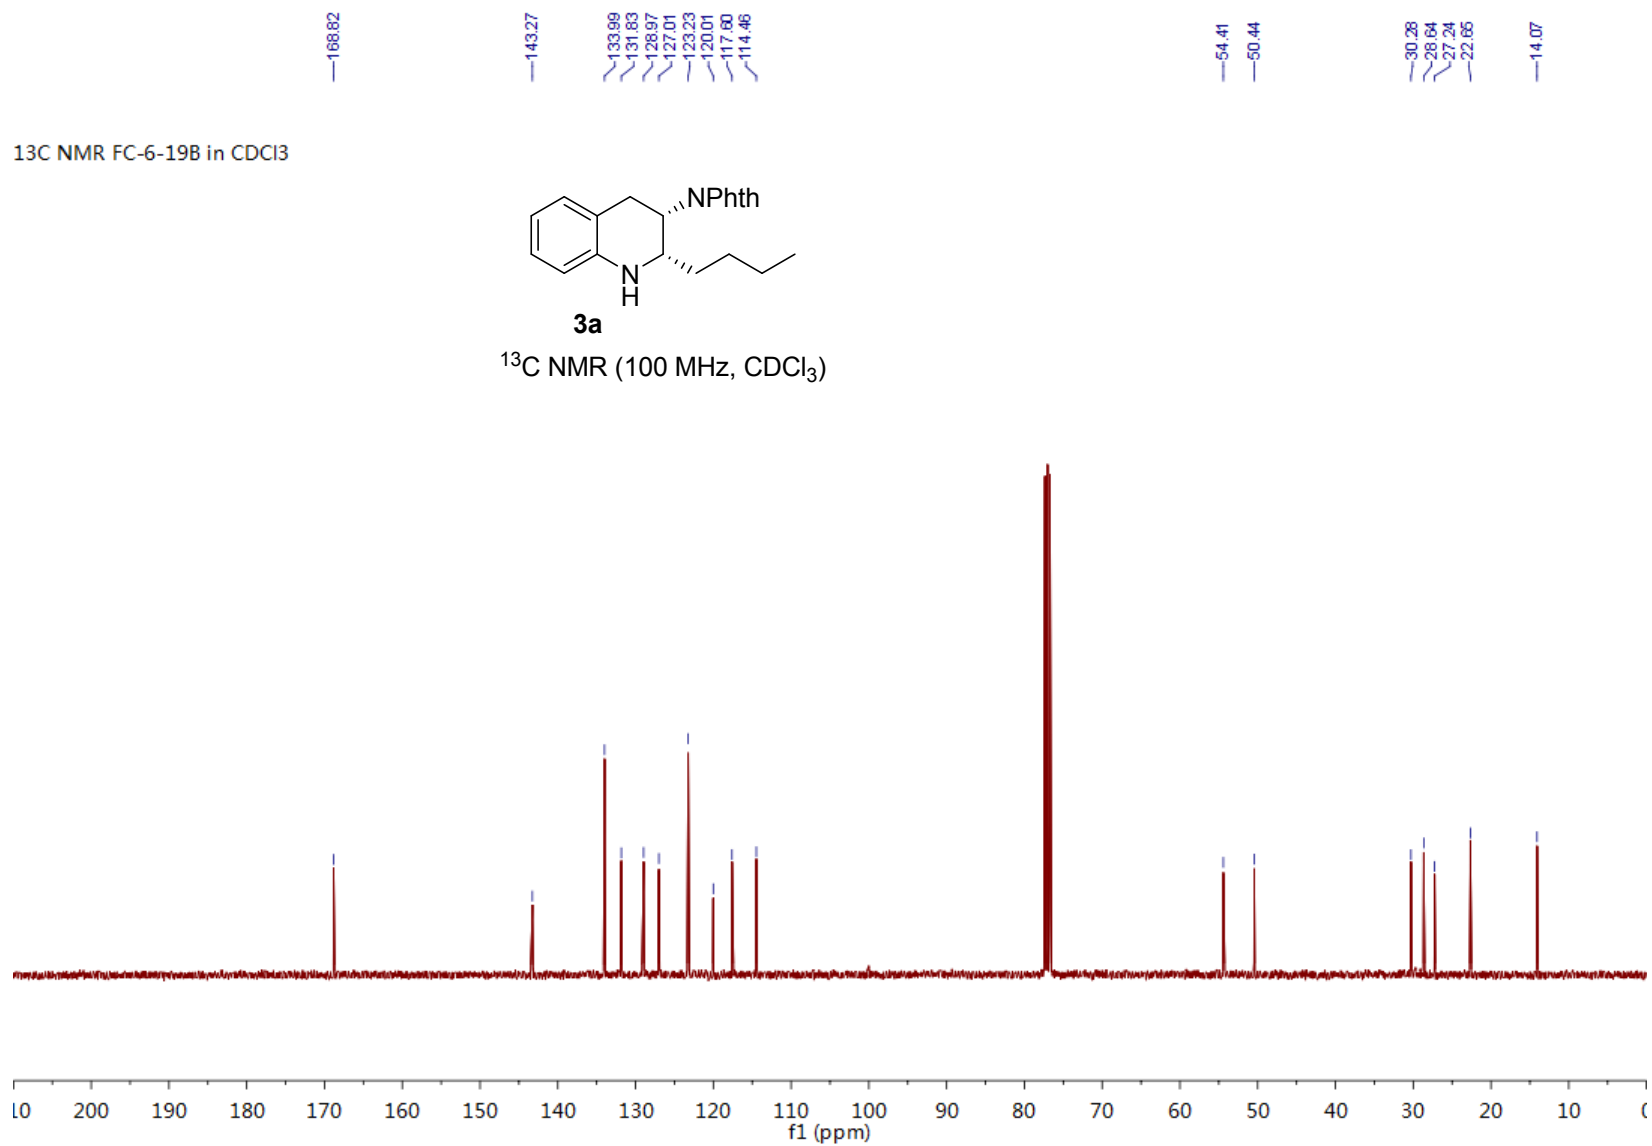



7.8441, 7.8406, 7.8313, 7.8237, 7.8177, 7.8101, 7.8003, 7.7261, 7.7163, 7.7067, 7.7027, 7.6951, 7.6868, 7.6823, 7.0391, 7.0186, 6.9962, 6.7113, 6.7092, 6.6928, 6.6910, 6.6744, 6.6722, 6.5903, 6.5407, 4.8208, 4.8114, 4.8048, 4.7972, 4.7886, 4.7820, 4.7726, 3.9303, 3.9164, 3.8977, 3.8748, 3.8396, 3.6981, 3.6824, 3.6799, 3.0746, 3.0489, 3.0330, 1.2234, 1.2070

<sup>1</sup>H NMR FC-6-21A in CDCl<sub>3</sub>

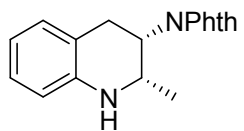

**3b**

<sup>1</sup>H NMR (400 MHz, CDCl<sub>3</sub>)

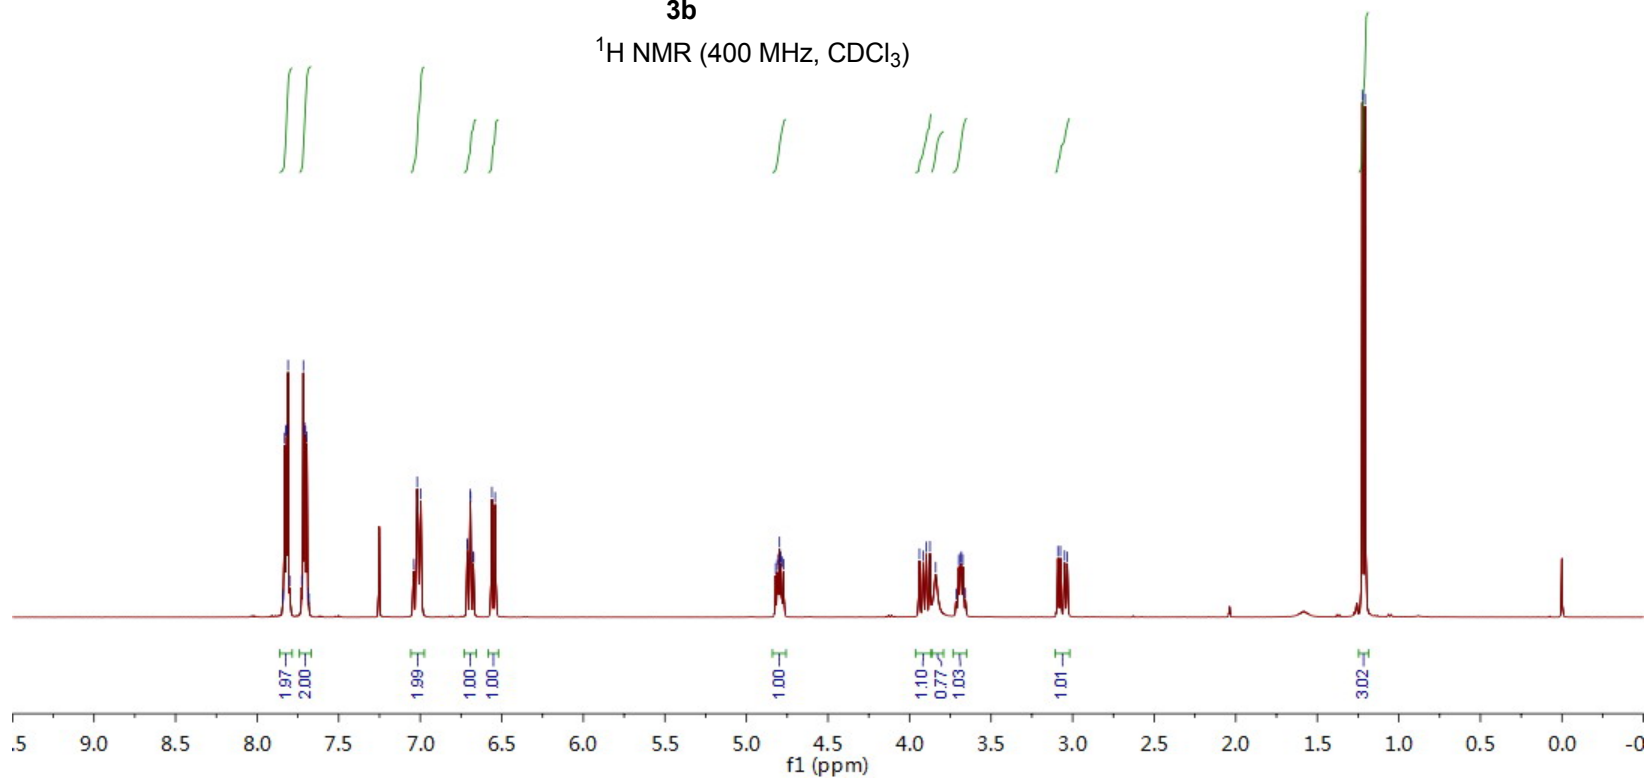

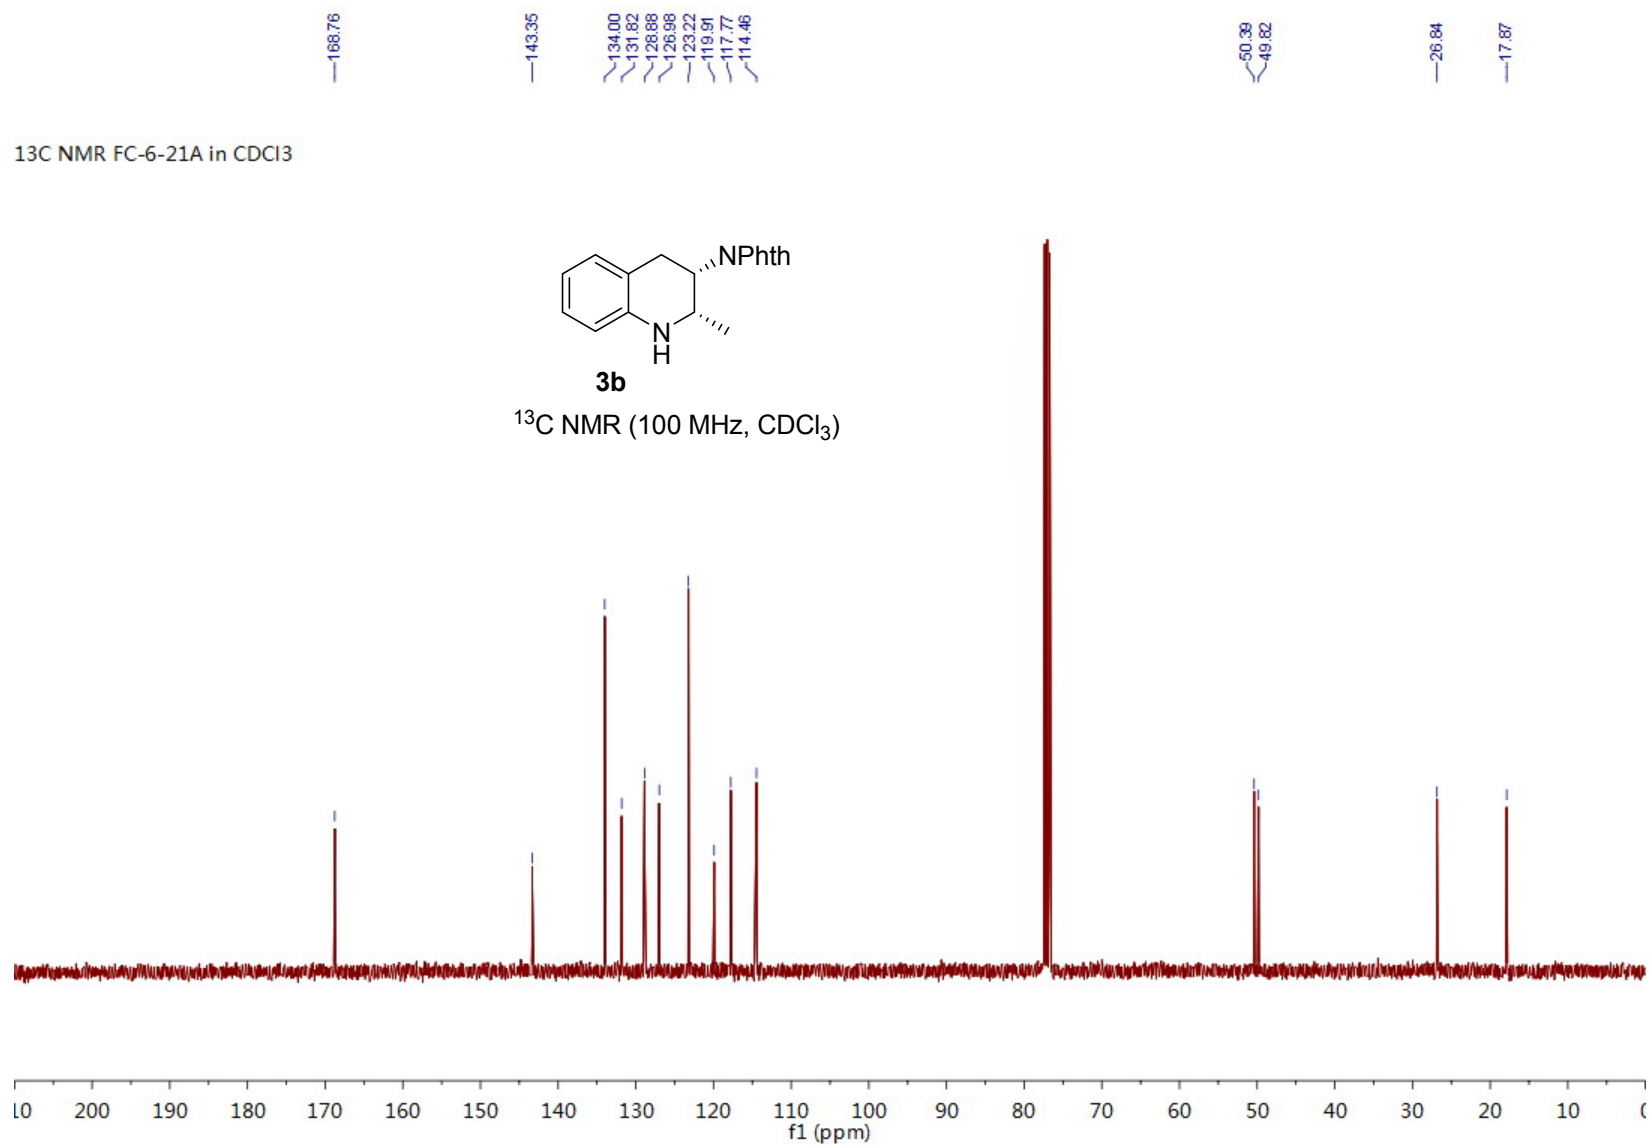

7.8421  
7.8330  
7.8253  
7.8193  
7.8118  
7.8020  
7.7281  
7.7180  
7.7103  
7.7045  
7.6968  
7.6877  
7.0409  
7.0222  
7.0025  
6.9837  
6.6965  
6.6782  
6.6687  
6.5622  
6.5623

4.8771  
4.8675  
4.8616  
4.8523  
4.8430  
4.8371  
4.8275

4.0879  
3.9846  
3.9800  
3.9433  
3.9187

3.3730  
3.3632  
3.3580  
3.3453  
3.0348  
3.0069  
2.9594

1.6237  
1.6070  
1.5992  
1.5887  
1.5823  
1.5709  
1.5637  
1.5531  
1.5439  
1.5346  
1.5251  
1.5182  
0.9869  
0.9868  
0.9463

<sup>1</sup>H NMR FC-6-21H in CDCl<sub>3</sub>

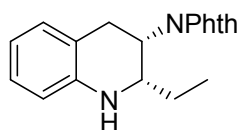

<sup>1</sup>H NMR (400 MHz, CDCl<sub>3</sub>)

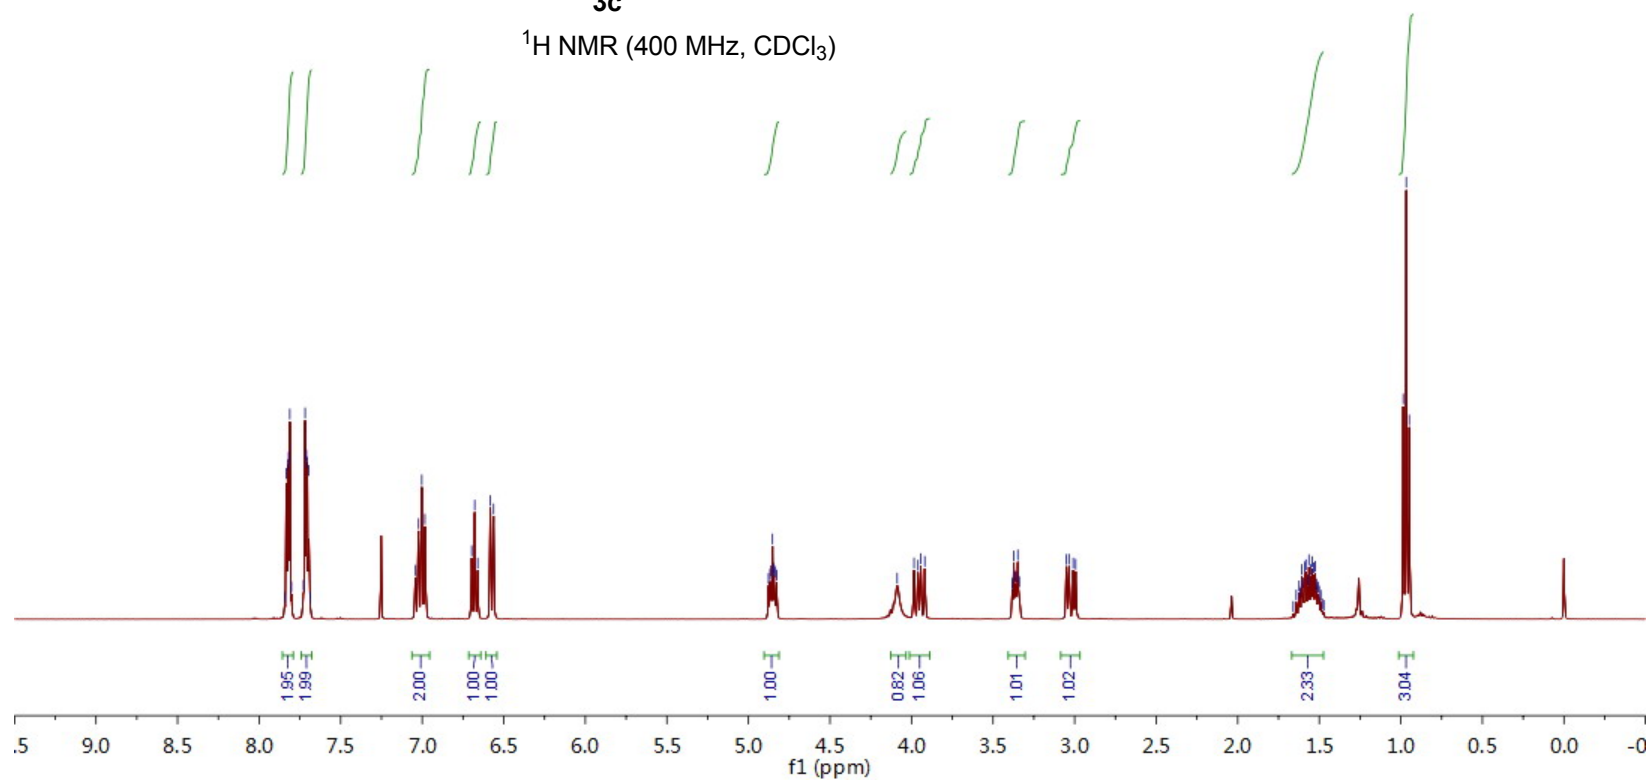

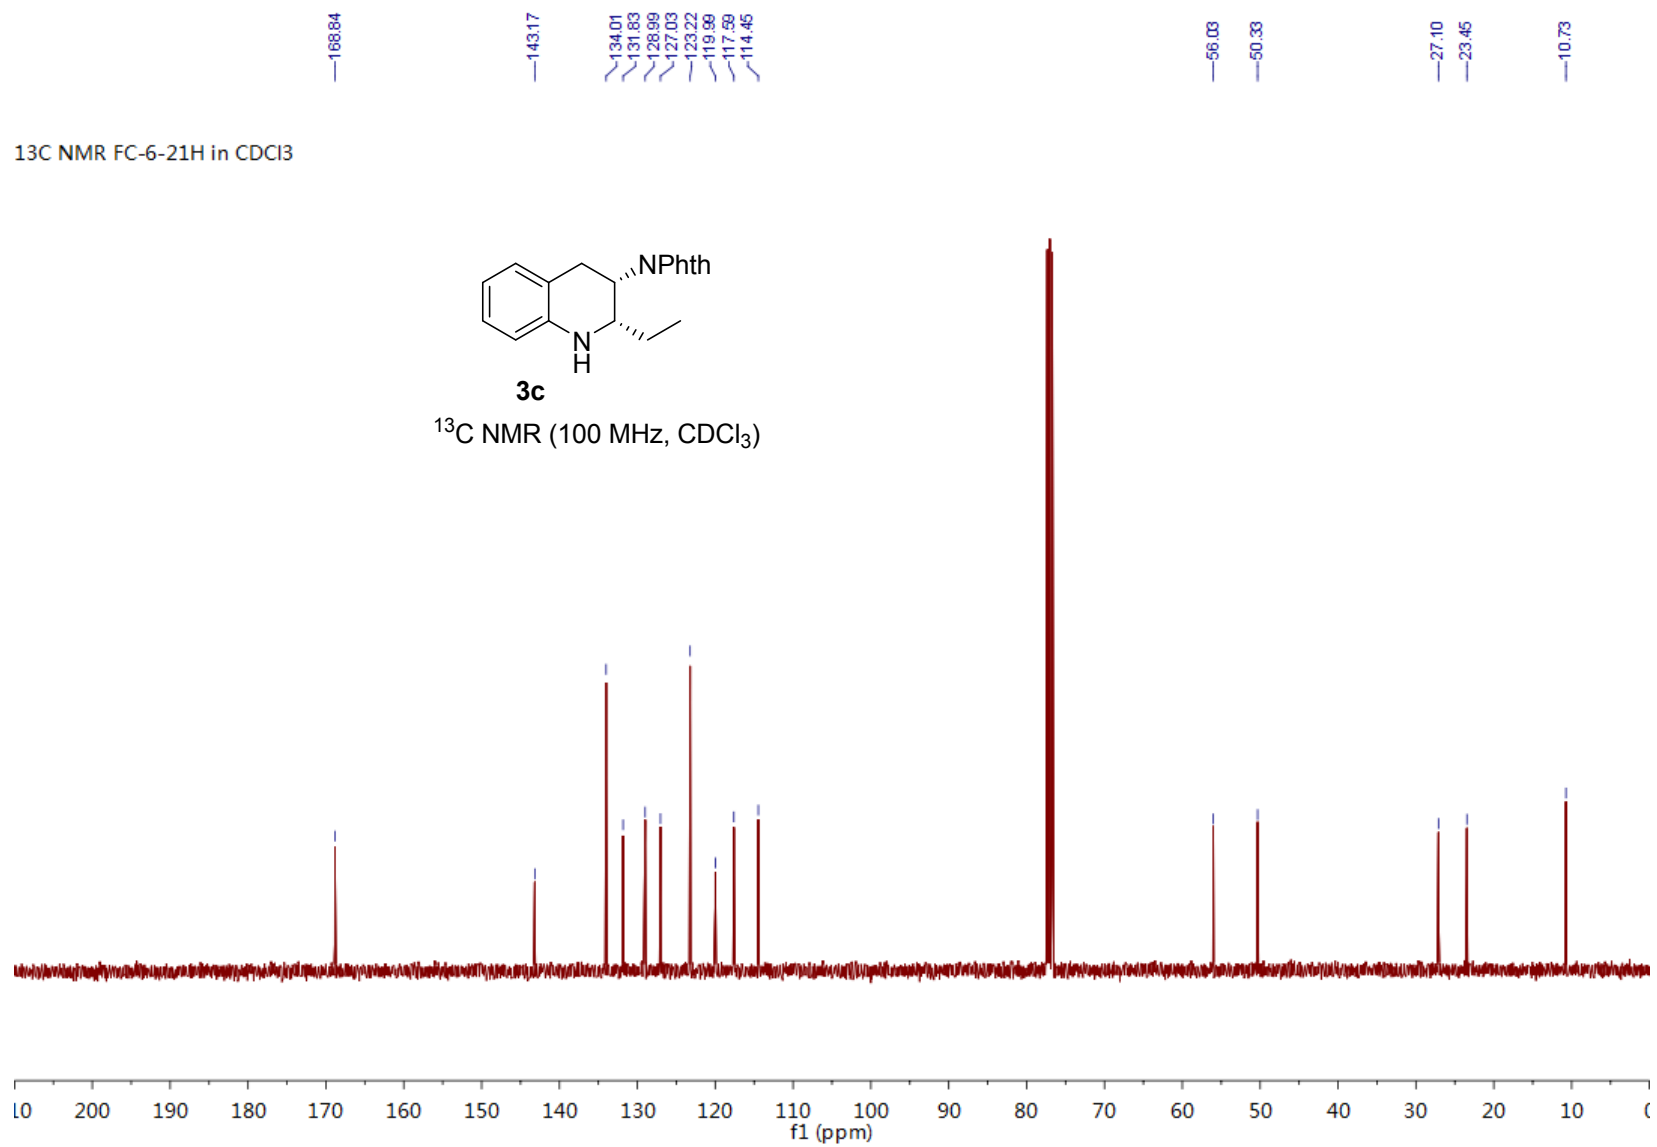

7.8377  
7.8300  
7.8241  
7.8165  
7.8066  
7.7311  
7.7213  
7.7136  
7.7077  
7.7001  
7.6908  
7.0404  
7.0216  
7.0042  
6.9865  
6.7003  
6.6886  
6.6818  
6.6634  
6.5726  
6.5528  
4.8516  
4.8422  
4.8361  
4.8271  
4.8181  
4.8120  
4.8026  
4.0312  
3.9983  
3.9442  
3.9289  
3.9027  
3.4941  
3.4861  
3.4778  
3.4695  
3.4609  
3.4527  
3.0653  
3.0497  
3.0238  
3.0083  
1.6349  
1.6208  
1.6097  
1.5968  
1.5888  
1.5843  
1.5784  
1.5648  
1.5541  
1.5379  
1.5321  
1.5249  
1.5202  
1.5140  
1.5071  
1.5013  
1.4889  
1.4825  
1.4731  
1.4685  
1.4503  
1.4467  
1.4371  
1.4276  
1.4209  
1.4137  
1.4053  
1.3888  
1.3421  
1.3295  
1.3251  
1.3174  
1.3121  
1.3058  
1.2981  
1.2941  
1.2872  
1.2796  
1.2748  
1.2686  
1.2587  
0.9080  
0.8902  
-0.8723

<sup>1</sup>H NMR FC-6-21G in CDCl<sub>3</sub>

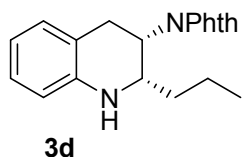

<sup>1</sup>H NMR (400 MHz, CDCl<sub>3</sub>)

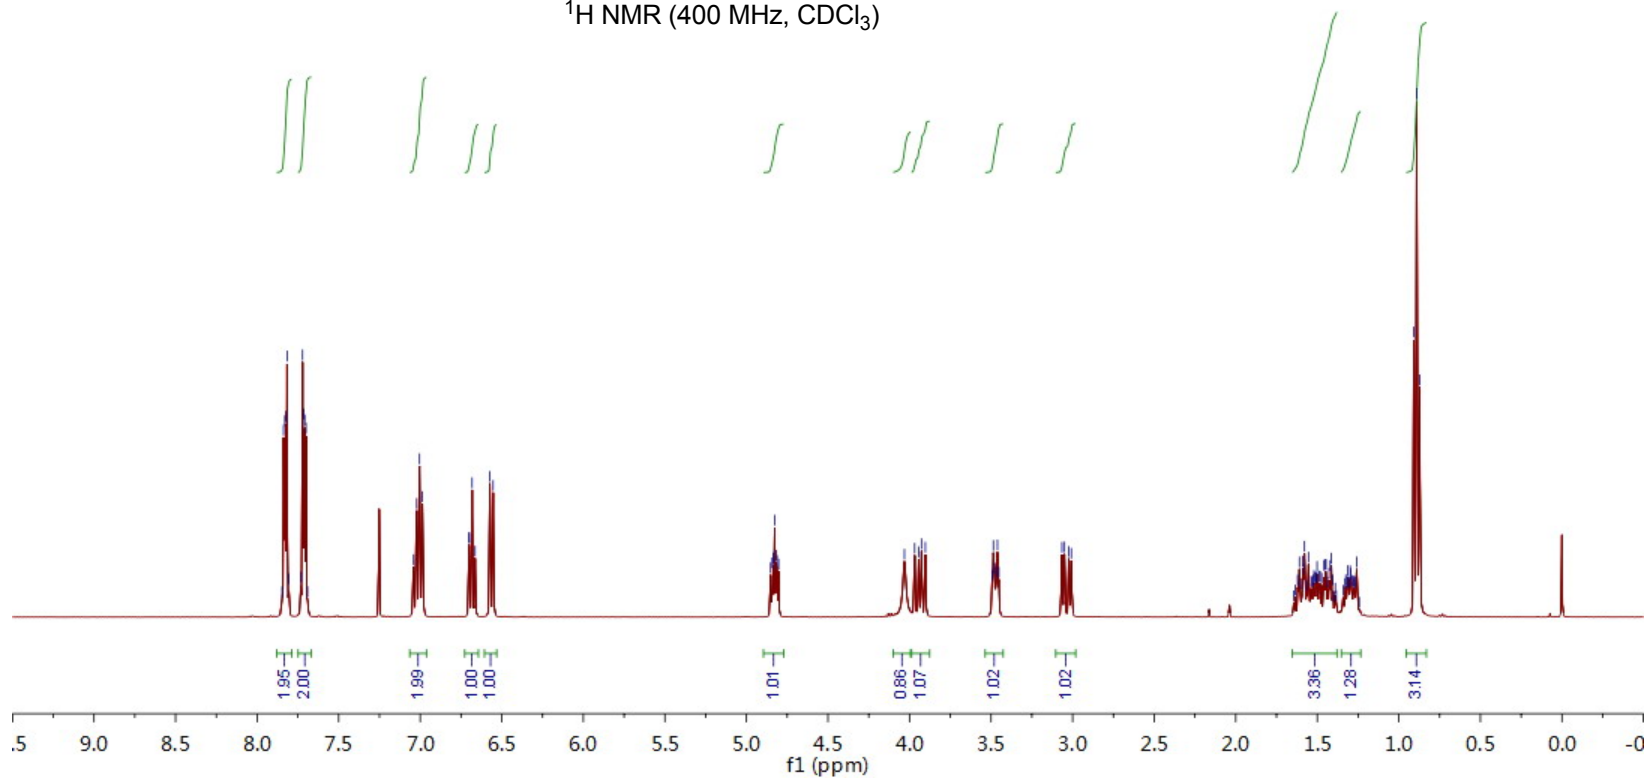

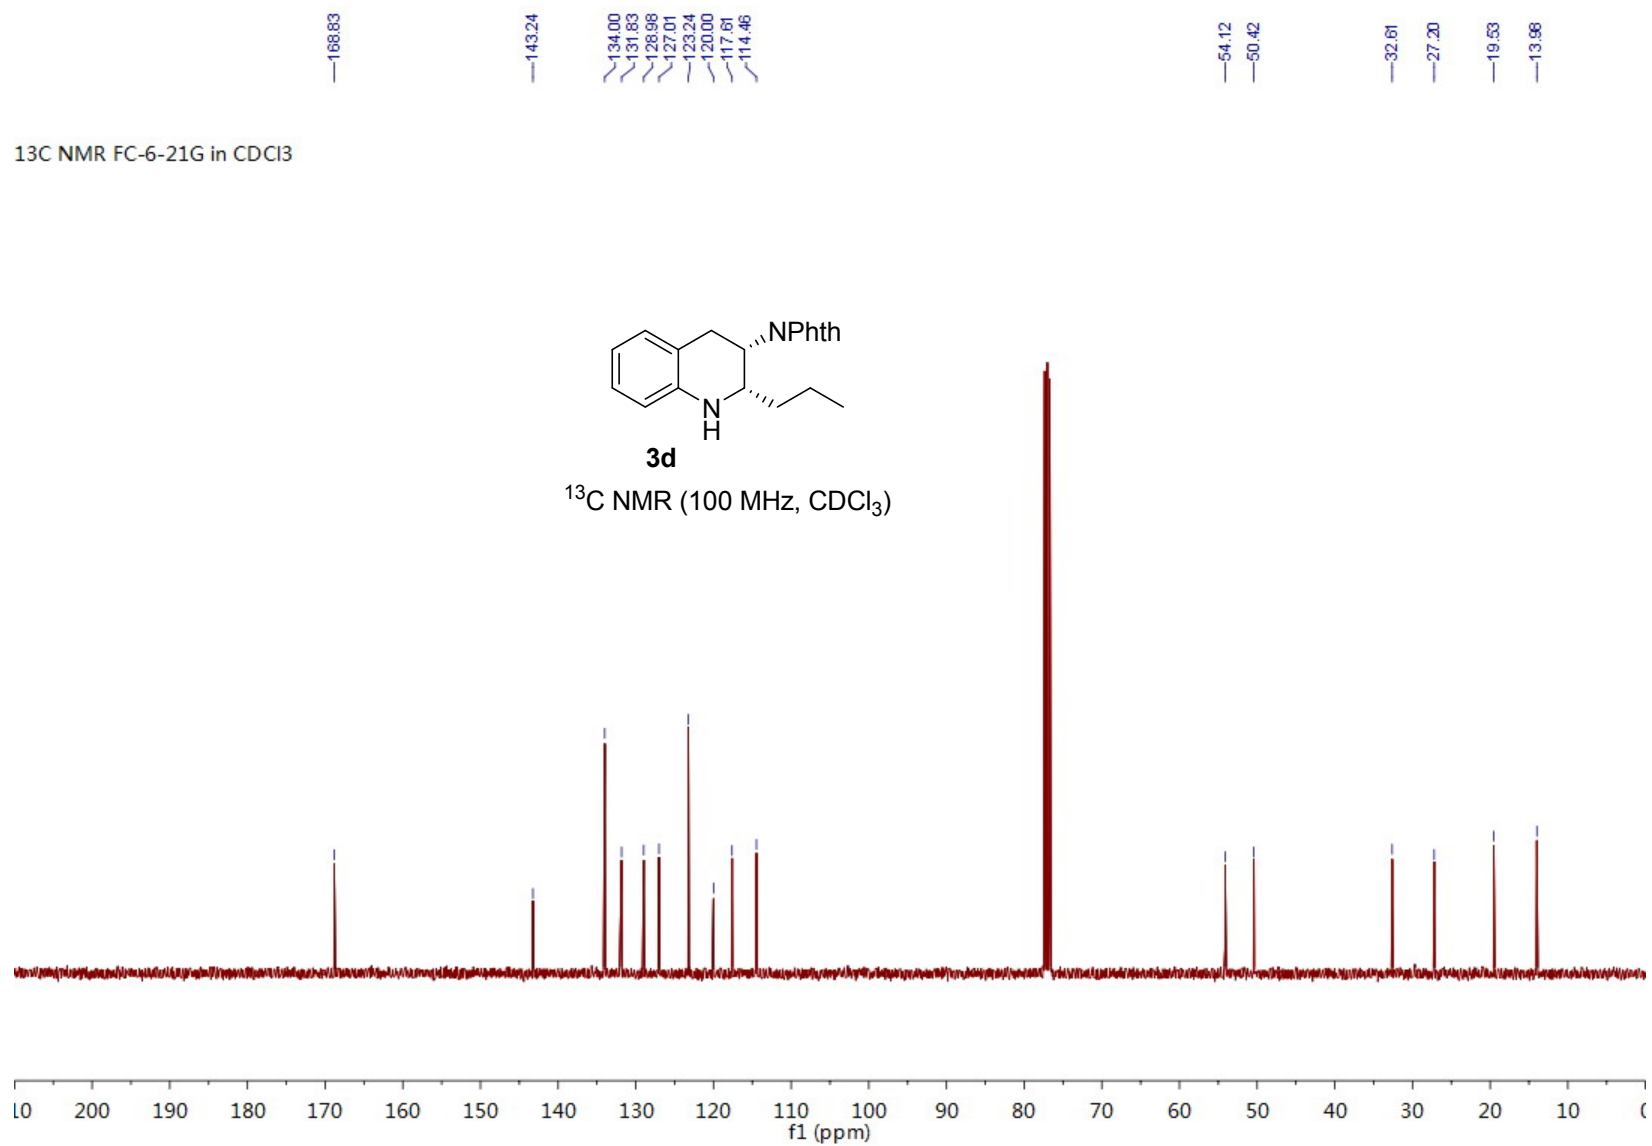

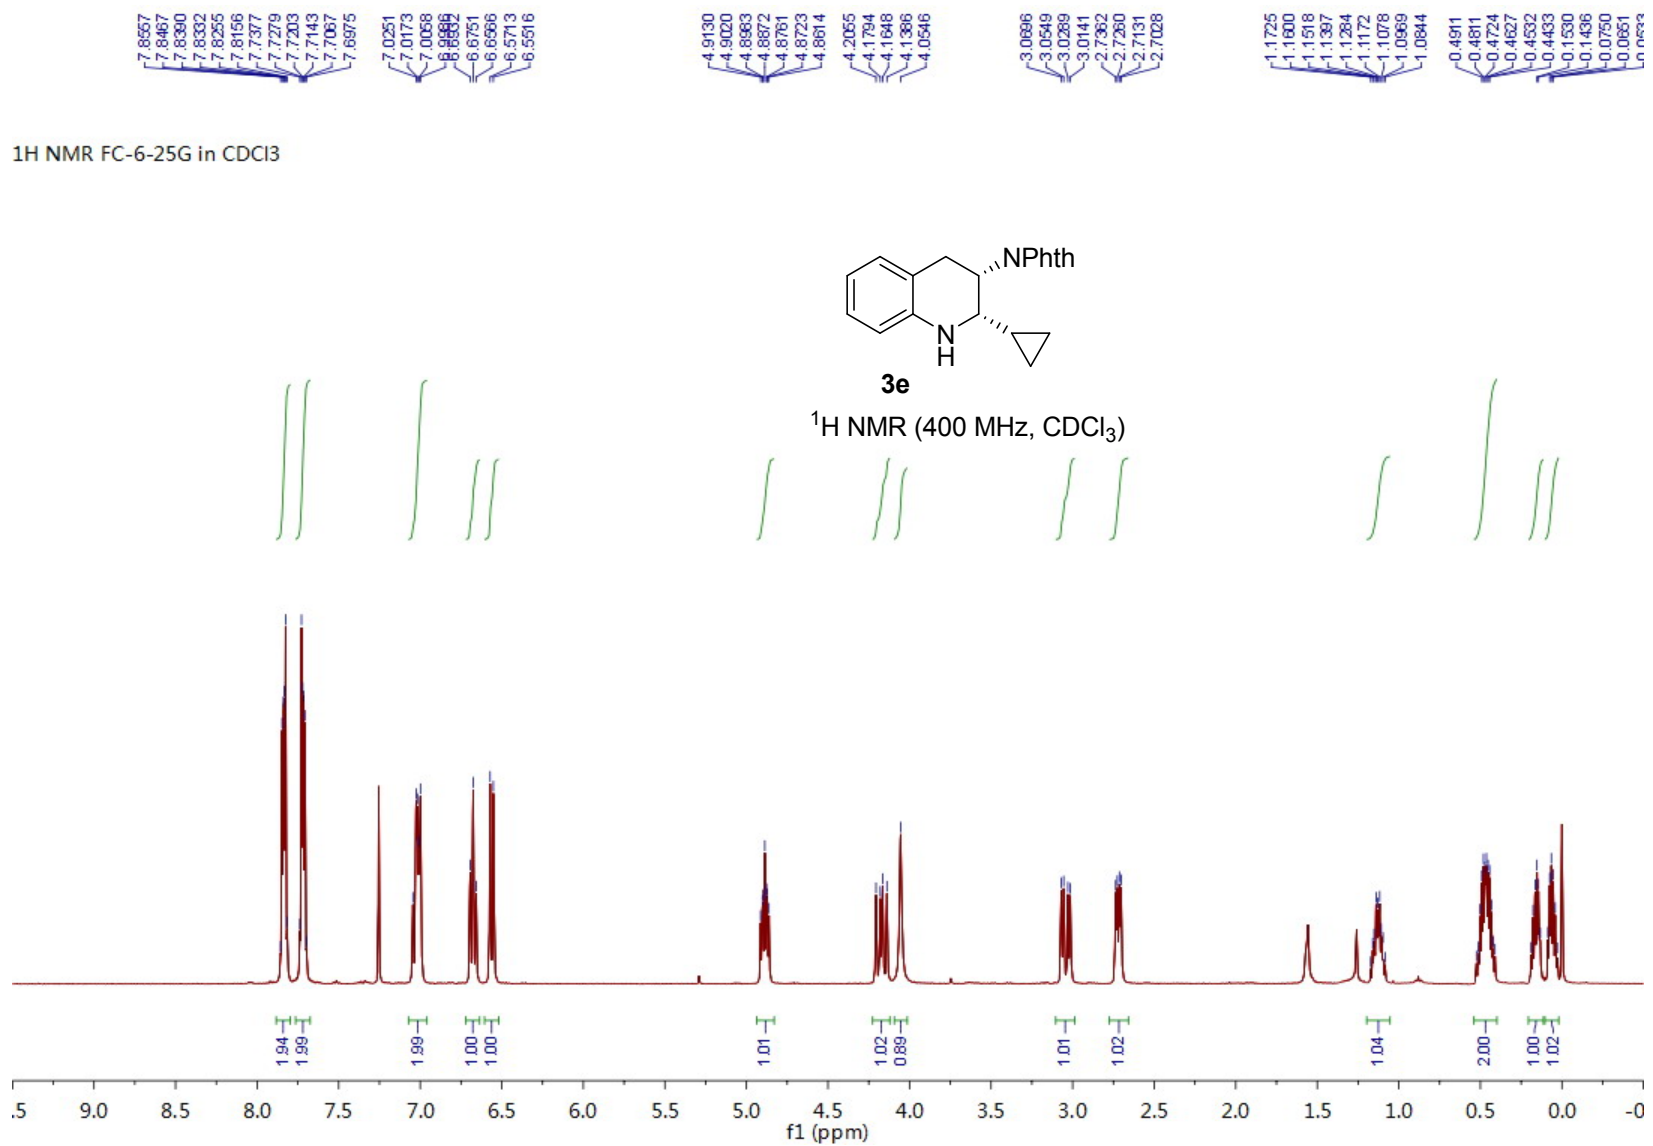

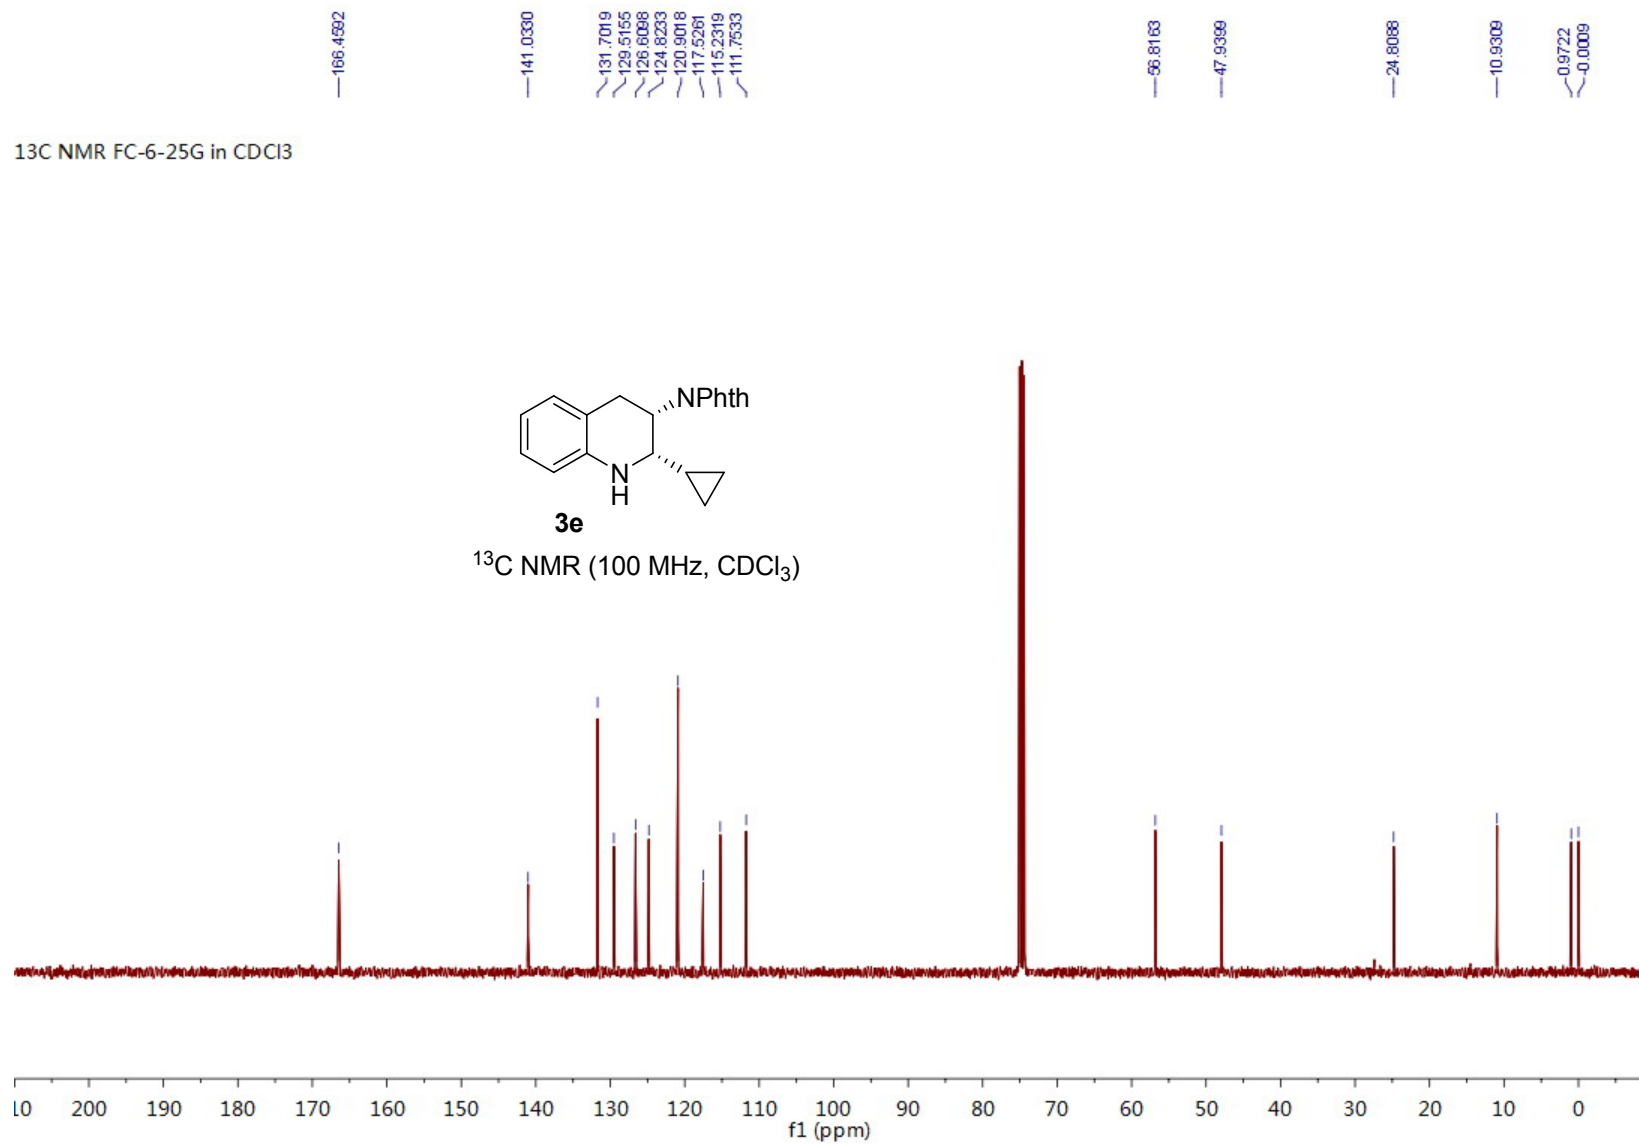



7.8467  
7.8374  
7.8297  
7.8237  
7.8162  
7.8064  
7.8038  
7.7319  
7.7221  
7.7144  
7.7085  
7.7008  
7.6916  
7.6881  
7.0438  
7.0251  
7.0077  
6.9909  
6.7094  
6.7071  
6.6908  
6.6667  
6.6725  
6.6702  
6.5749  
6.5553

4.8267  
4.8194  
4.8128  
4.8042  
4.7967  
4.7901  
4.7808

3.9700  
3.9054  
3.8826  
3.8638  
3.8409

3.5914  
3.5738  
3.5655  
3.5655  
3.0896  
3.0638  
3.0480

1.7512  
1.7406  
1.7333  
1.7268  
1.7162  
1.6227  
1.6117  
1.5967  
1.5876  
1.5774  
1.5623  
1.5514

1.2348  
1.2258  
0.9743  
0.8978  
0.8597  
0.8433

<sup>1</sup>H NMR FC-6-25F in CDCl<sub>3</sub>

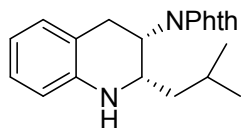

**3f**

<sup>1</sup>H NMR (400 MHz, CDCl<sub>3</sub>)

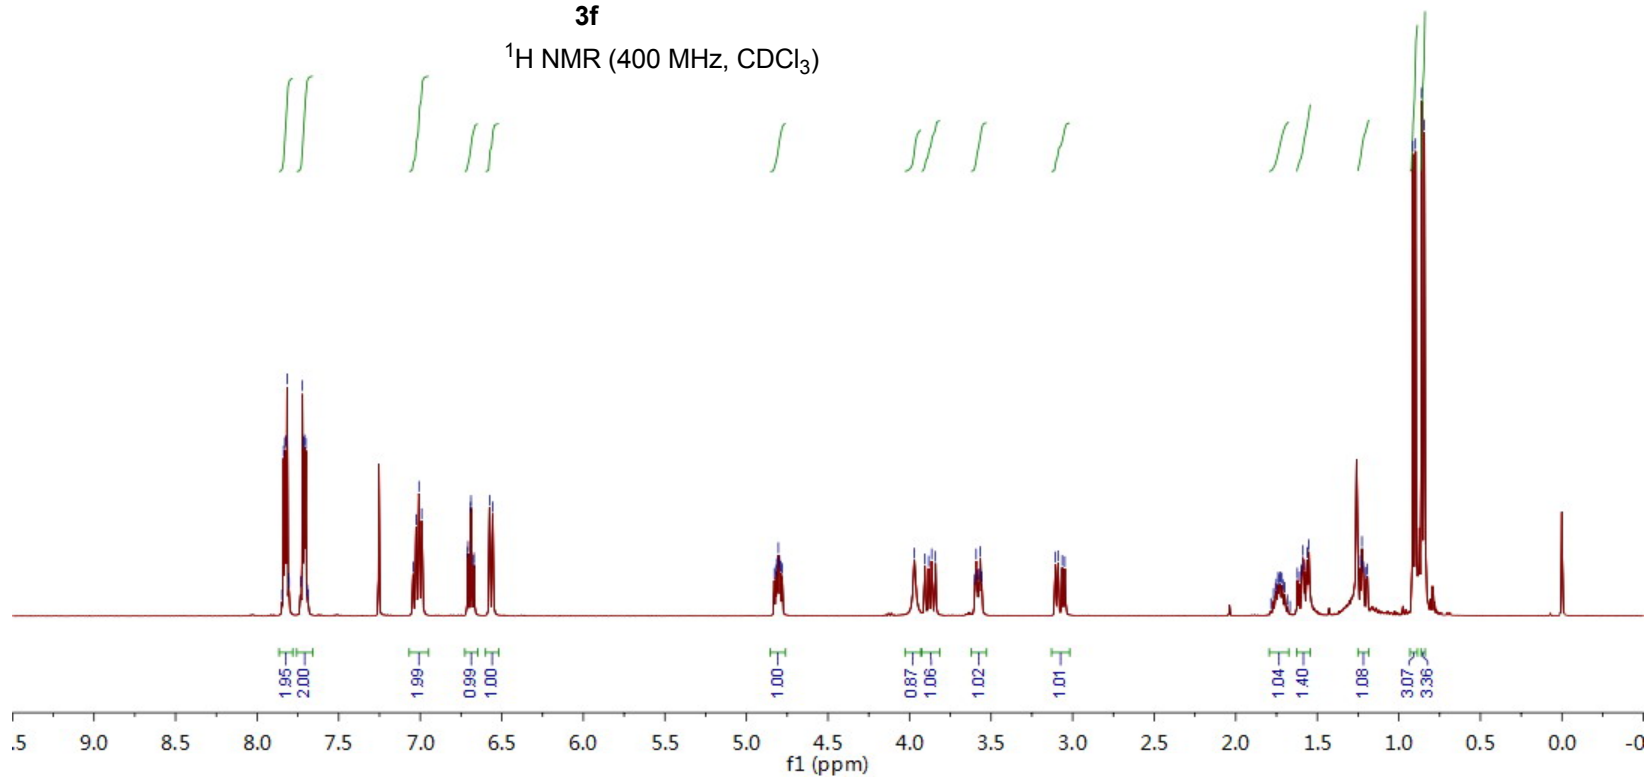

<sup>13</sup>C NMR FC-6-25F in CDCl<sub>3</sub>

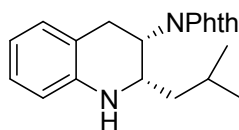

**3f**

<sup>13</sup>C NMR (100 MHz, CDCl<sub>3</sub>)

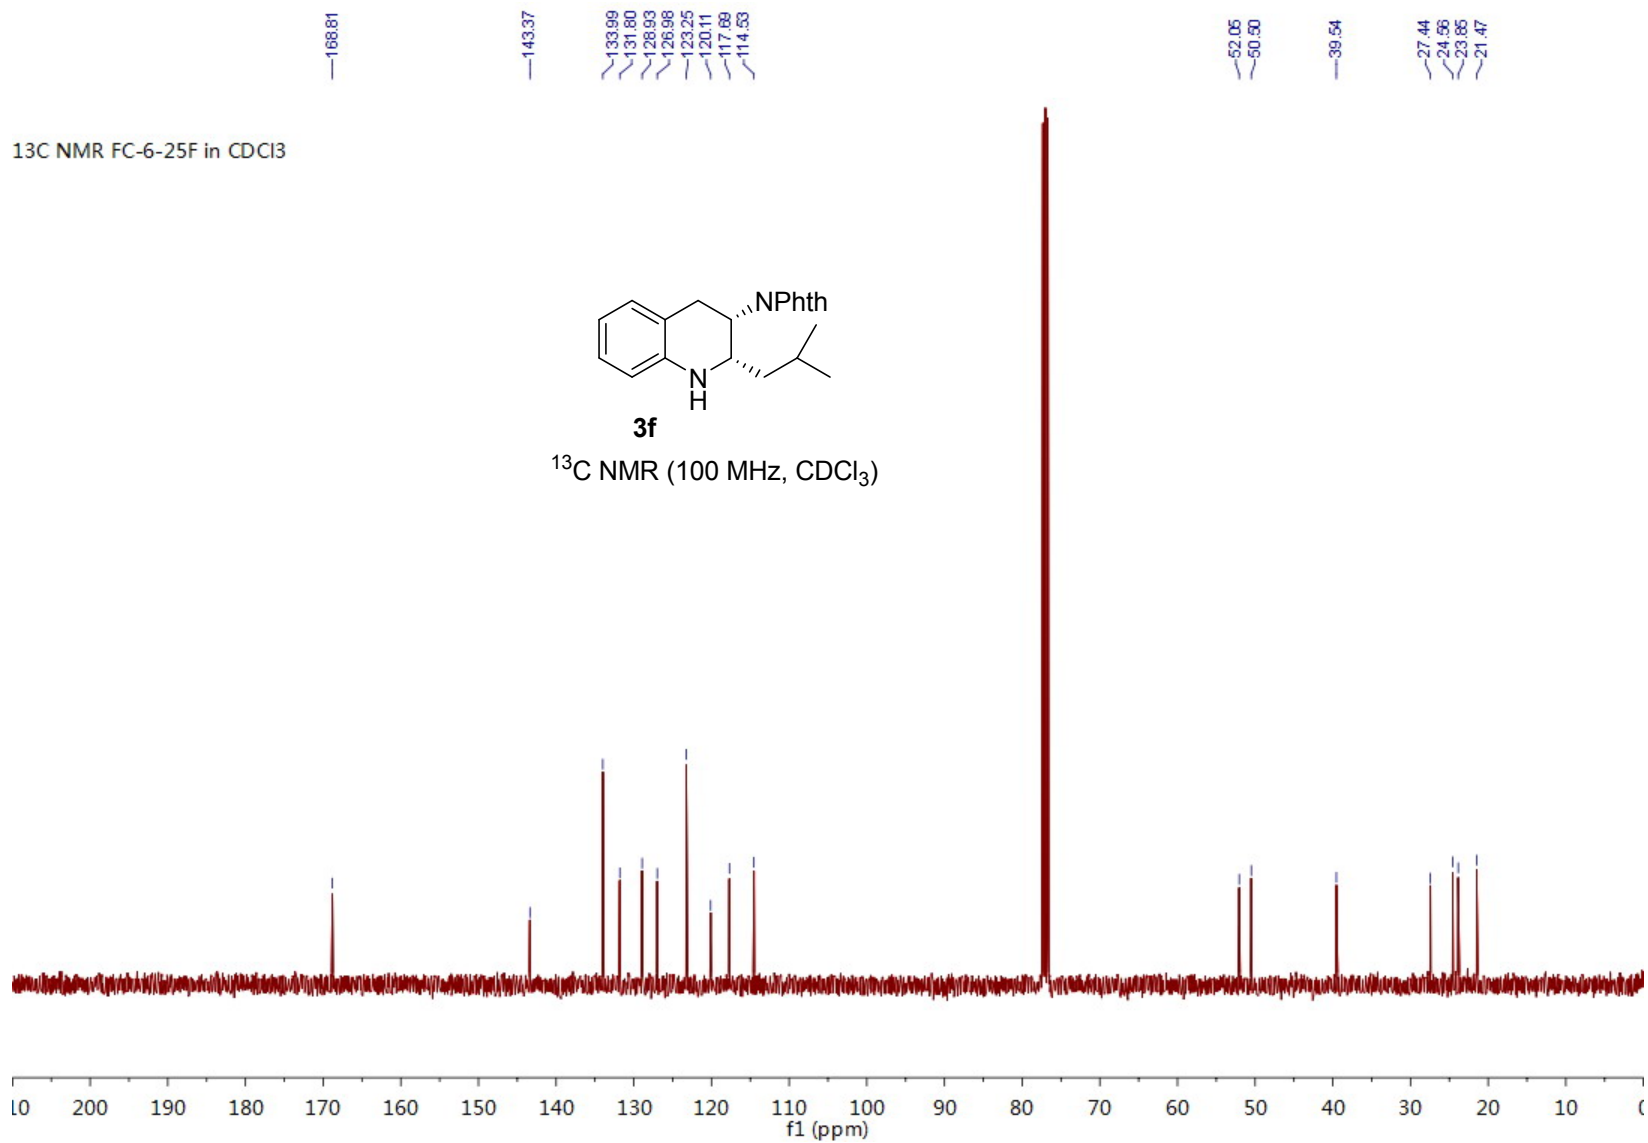

7.8442  
7.8352  
7.8275  
7.8220  
7.8142  
7.8037  
7.7269  
7.7168  
7.7092  
7.7032  
7.6956  
7.6883  
7.0403  
7.0215  
7.0017  
6.9828  
6.6984  
6.6800  
6.6616  
6.5775  
6.5576

4.8506  
4.8412  
4.8350  
4.8266  
4.8178  
4.8117  
4.8024

4.0285  
3.9351  
3.9116  
3.8937  
3.8702

3.4353  
3.4257  
3.4110  
3.4021  
3.0665  
3.0307  
3.0151

1.5784  
1.5638  
1.5417  
1.5291  
1.5134  
1.4965  
1.4804  
1.4633  
1.3456  
1.3317  
1.3168  
1.2030  
1.1886  
1.1734  
1.1593  
0.8419  
0.8252  
0.8199  
0.8032

<sup>1</sup>H NMR FC-6-25E in CDCl<sub>3</sub>

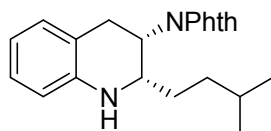

<sup>1</sup>H NMR (400 MHz, CDCl<sub>3</sub>)

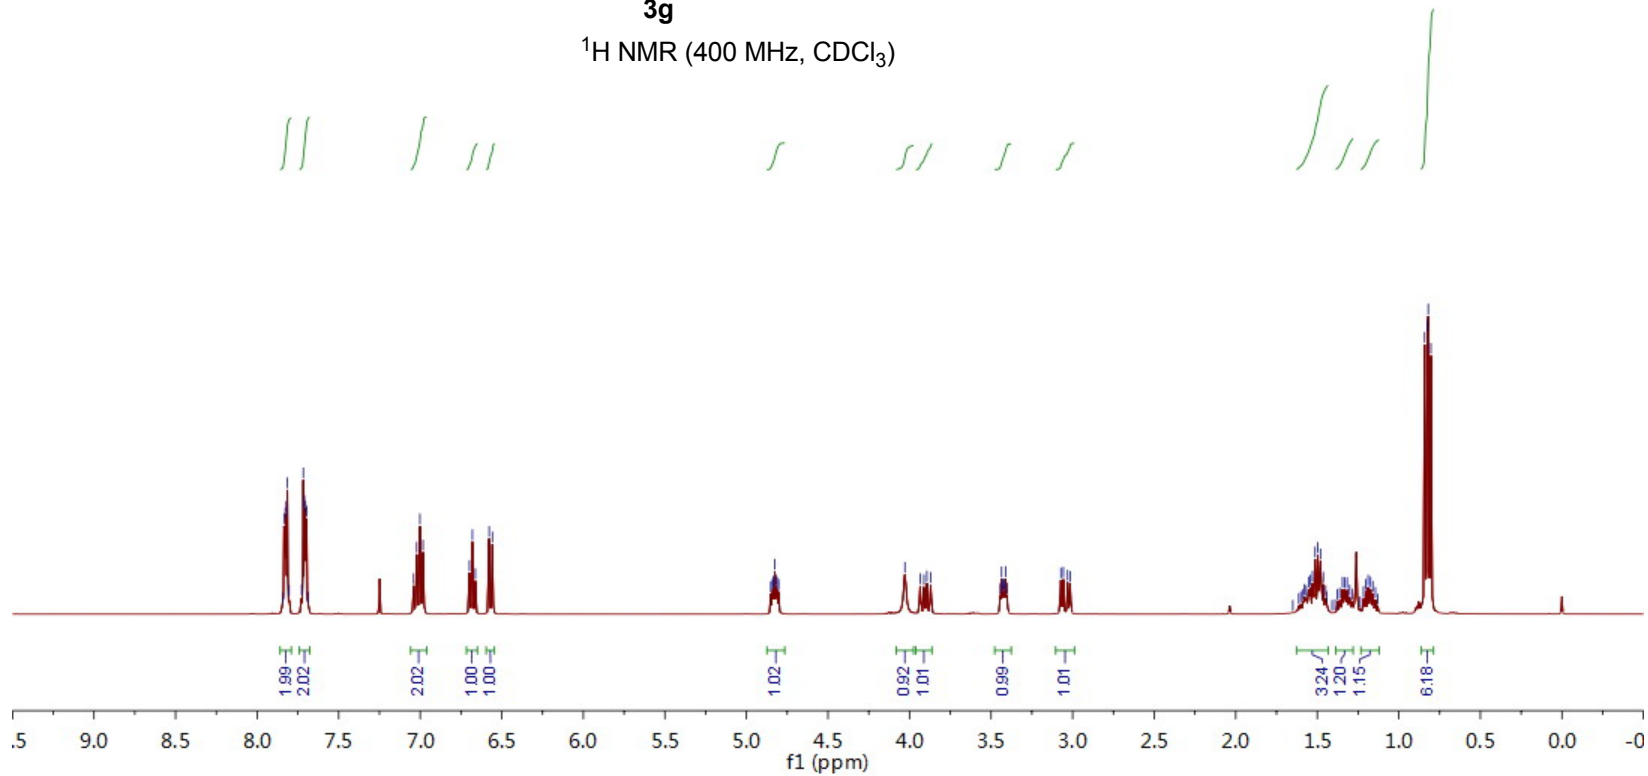

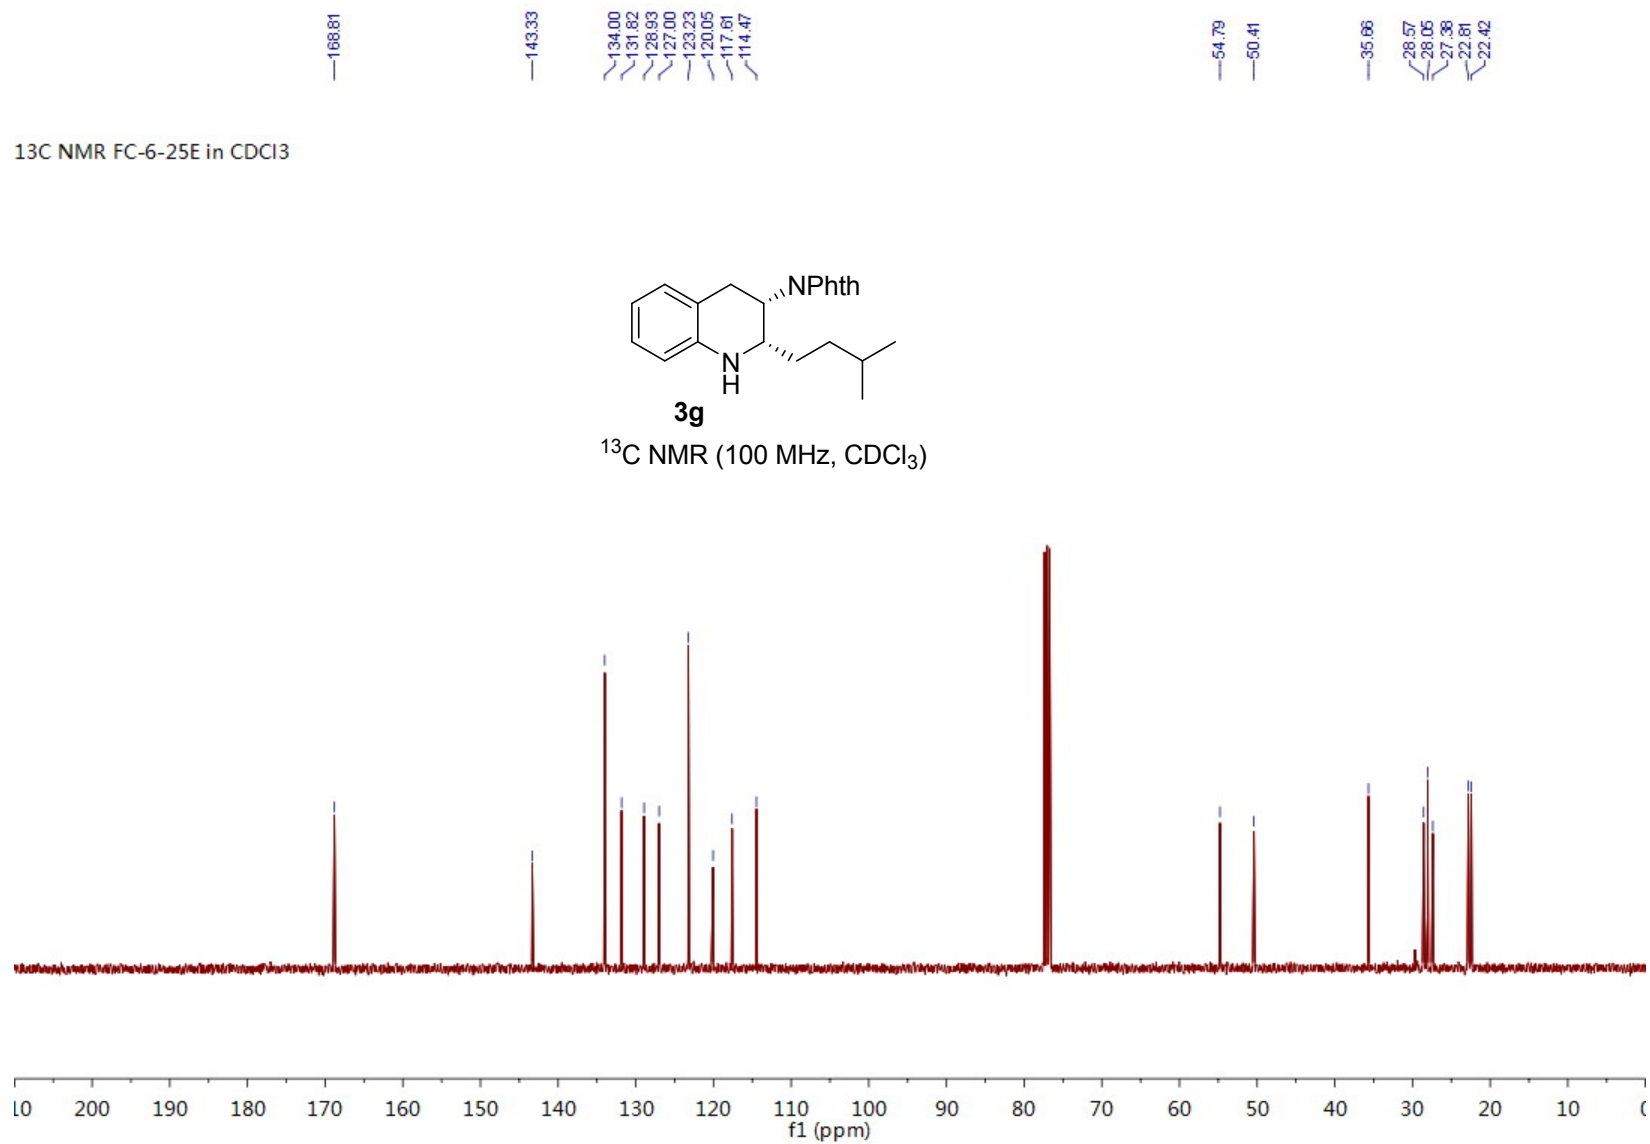

7.8359  
7.8282  
7.8223  
7.8147  
7.8048  
7.7285  
7.7188  
7.7112  
7.7052  
7.6975  
7.0404  
7.0216  
7.0025  
6.9843  
6.6989  
6.6970  
6.6804  
6.6787  
6.6621  
6.6601  
6.5766  
6.5668

4.8479  
4.8385  
4.8324  
4.8235  
4.8146  
4.8065  
4.7960

4.0335  
3.9969  
3.9329  
3.9155  
3.8915

3.4574  
3.4601  
3.4417  
3.0646  
3.0490  
3.0231  
3.0076

1.6248  
1.6015  
1.5782  
1.5645  
1.5299  
1.4950  
1.4851  
1.4496  
1.4163  
1.4082  
1.2825  
1.2591  
1.2470  
1.2233  
1.1630  
0.8424  
0.8258  
0.8064

<sup>1</sup>H NMR FC-6-21C in CDCl<sub>3</sub>

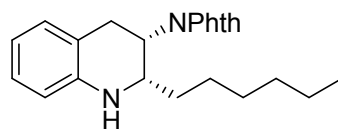

<sup>1</sup>H NMR (400 MHz, CDCl<sub>3</sub>)

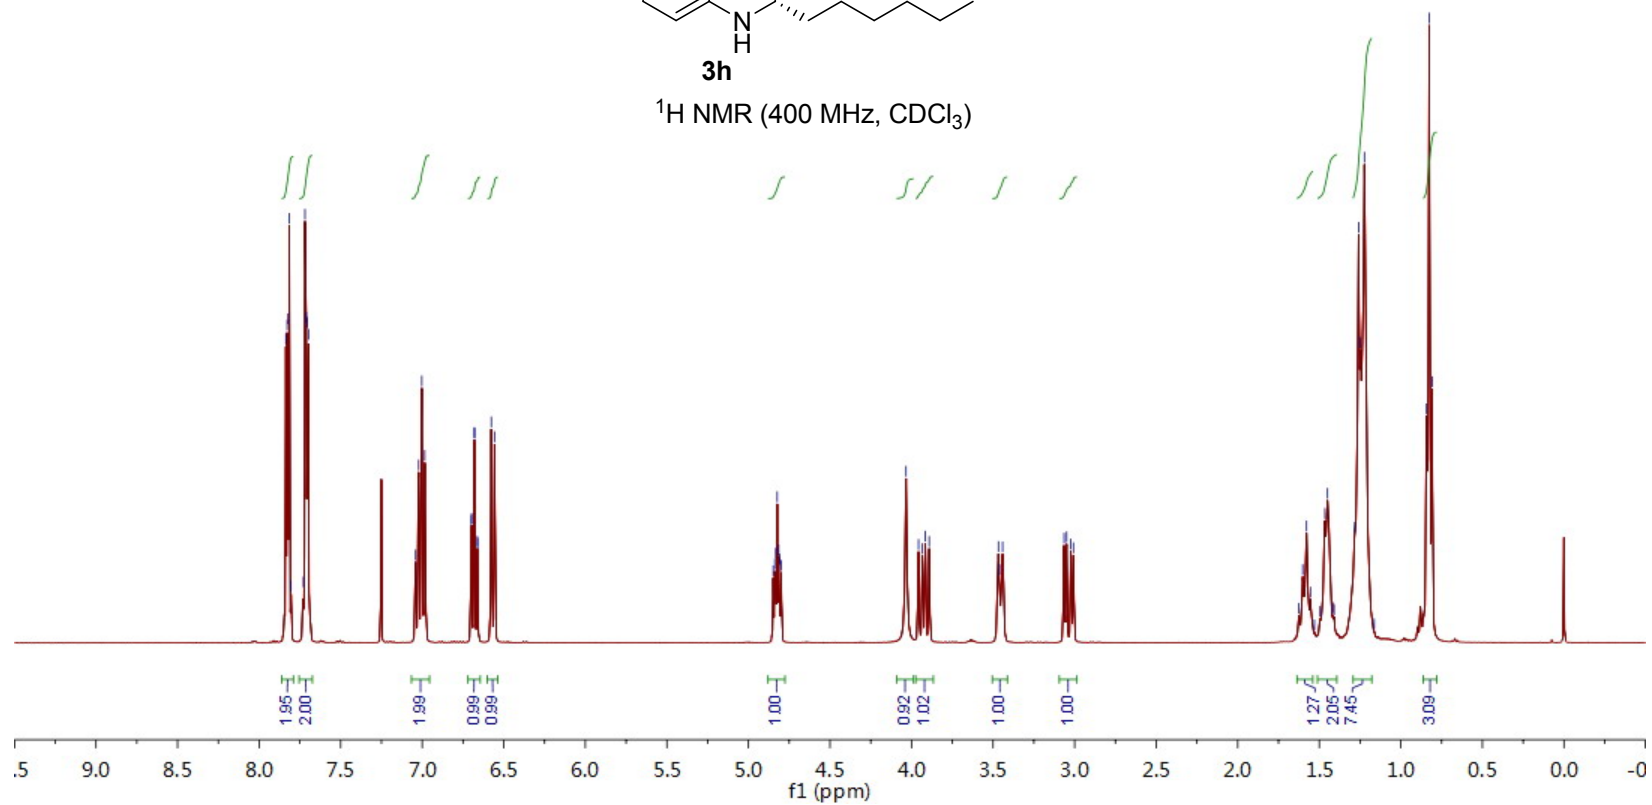

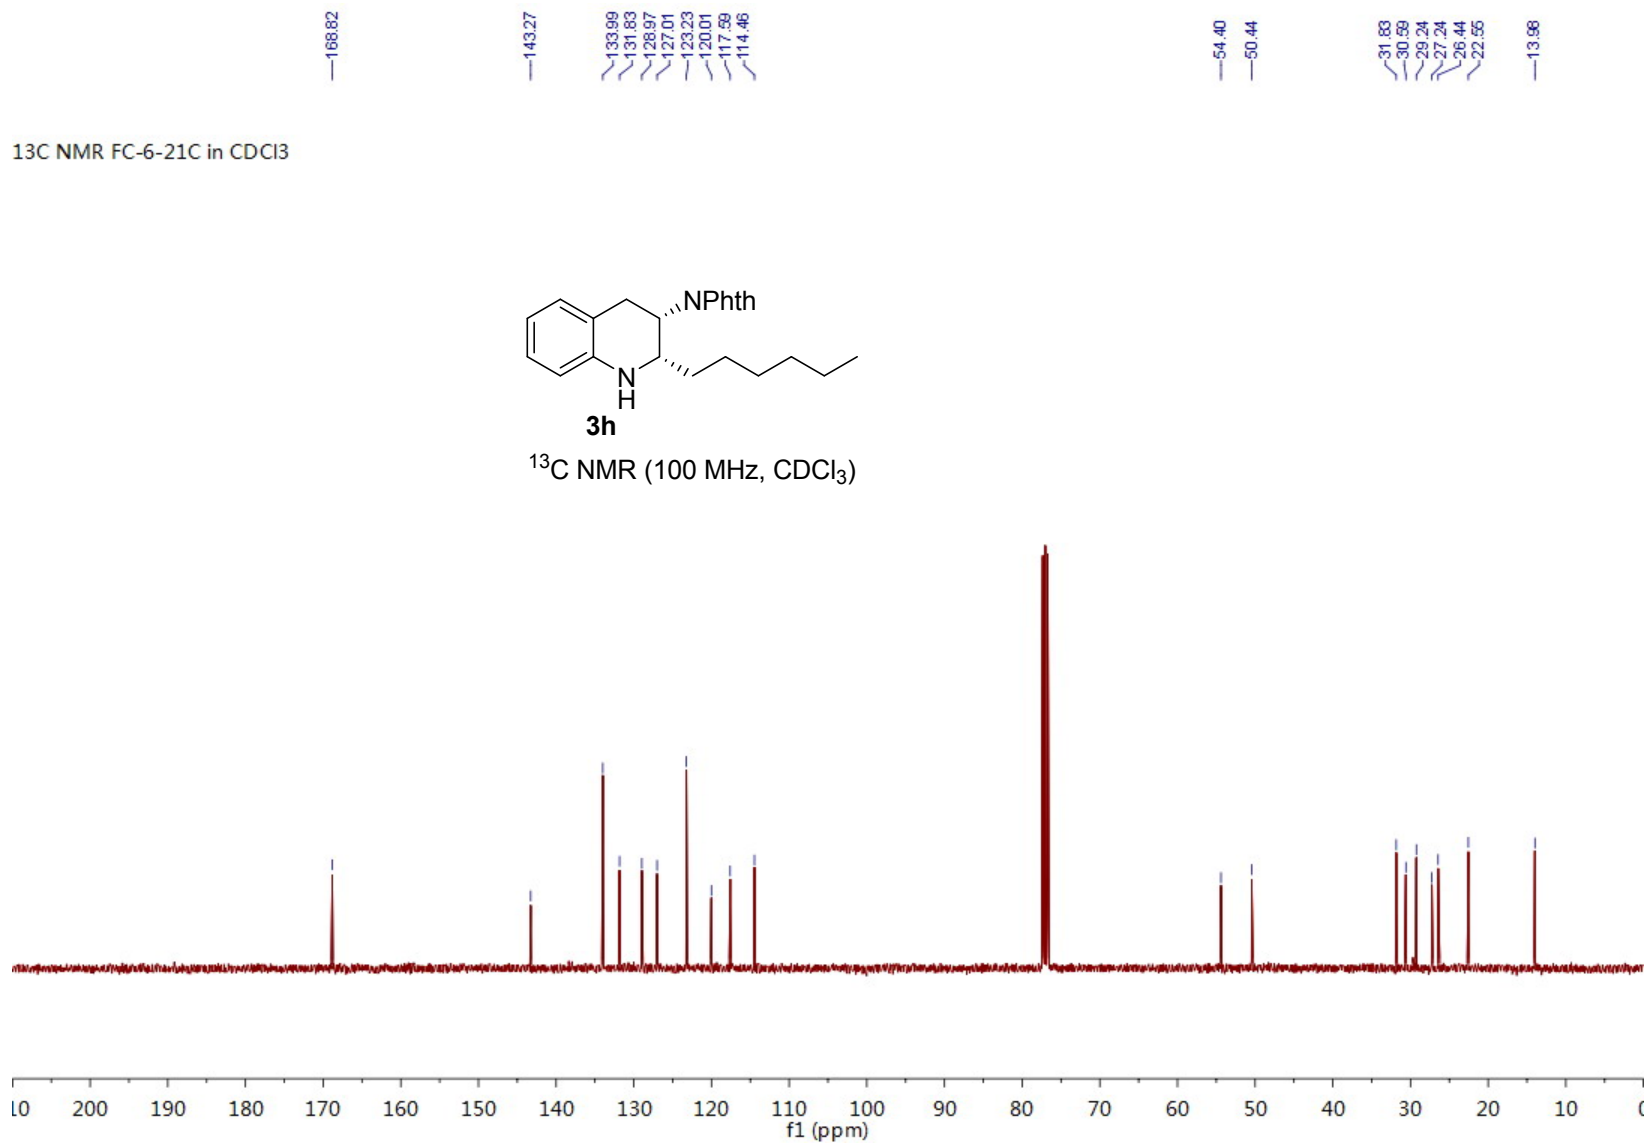

7.8237  
7.8146  
7.8069  
7.8010  
7.7934  
7.7835  
7.7150  
7.7052  
7.6976  
7.6916  
7.6840  
7.6749  
7.1998  
7.1814  
7.1202  
7.1178  
6.7114  
6.6834  
6.6682  
6.4667  
6.4570

4.8352  
4.8258  
4.8197  
4.8106  
4.8015  
4.7964  
4.7881

3.9711  
3.9464  
3.9301  
3.9054

3.5064  
3.4967  
3.4825

3.0547  
3.0393  
3.0132  
2.9978  
2.7999  
2.6773  
2.6735  
2.6670  
2.6610  
1.9643  
1.9574  
1.9450  
1.9298  
1.9227  
1.9056  
1.9000  
1.8891  
1.8834  
1.8811  
1.8725  
1.8641  
1.8577  
1.8499  
1.8408  
1.8318  
1.8234  
1.8154  
1.8066

<sup>1</sup>H NMR FC-6-21I in CDCl<sub>3</sub>

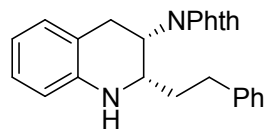

**3i**

<sup>1</sup>H NMR (400 MHz, CDCl<sub>3</sub>)

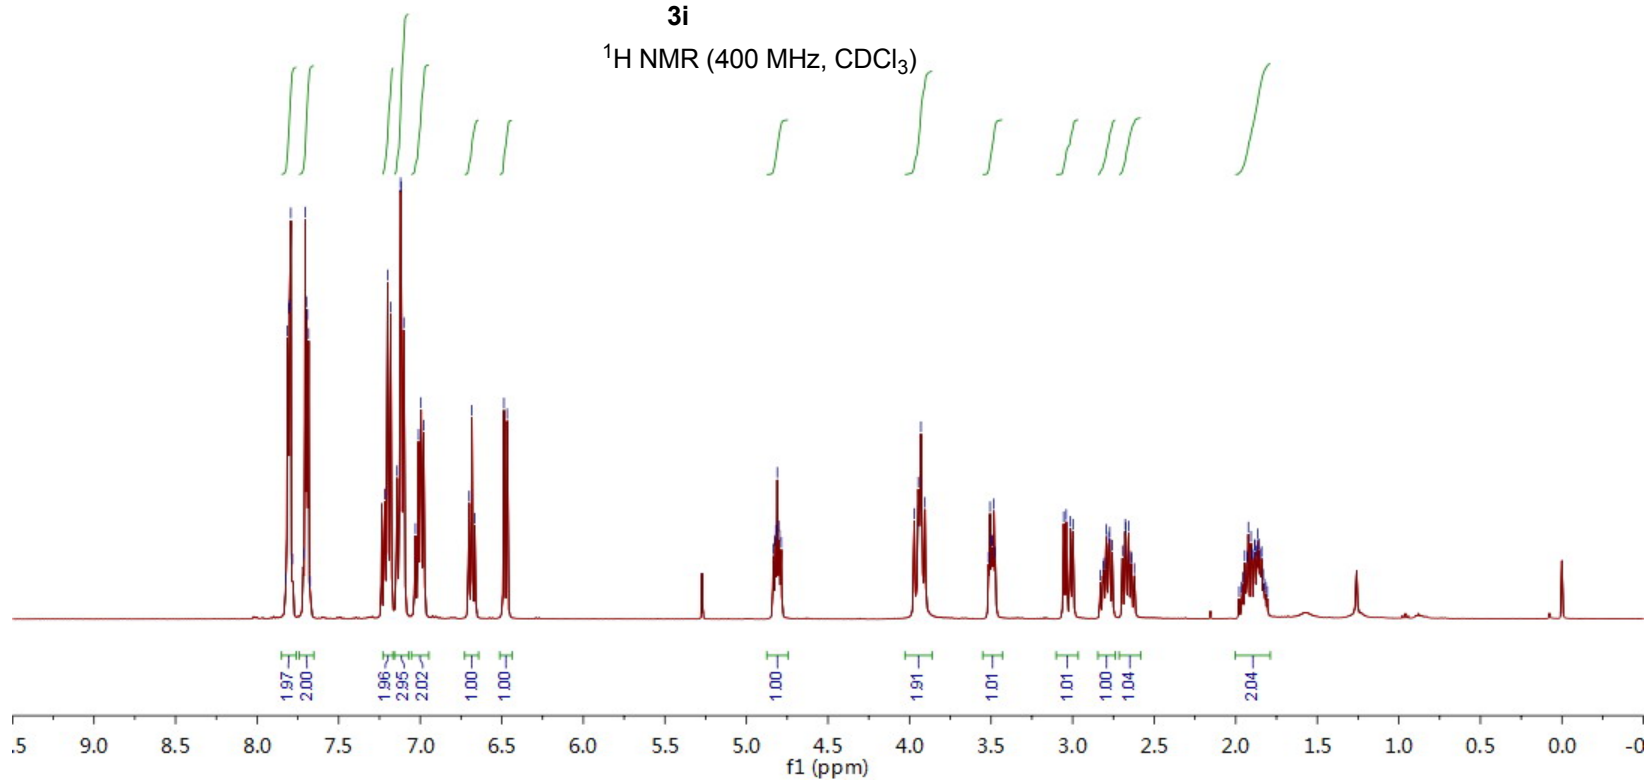

$^{13}\text{C}$  NMR FC-6-21I in  $\text{CDCl}_3$

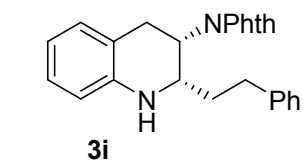

$^{13}\text{C}$  NMR (100 MHz,  $\text{CDCl}_3$ )

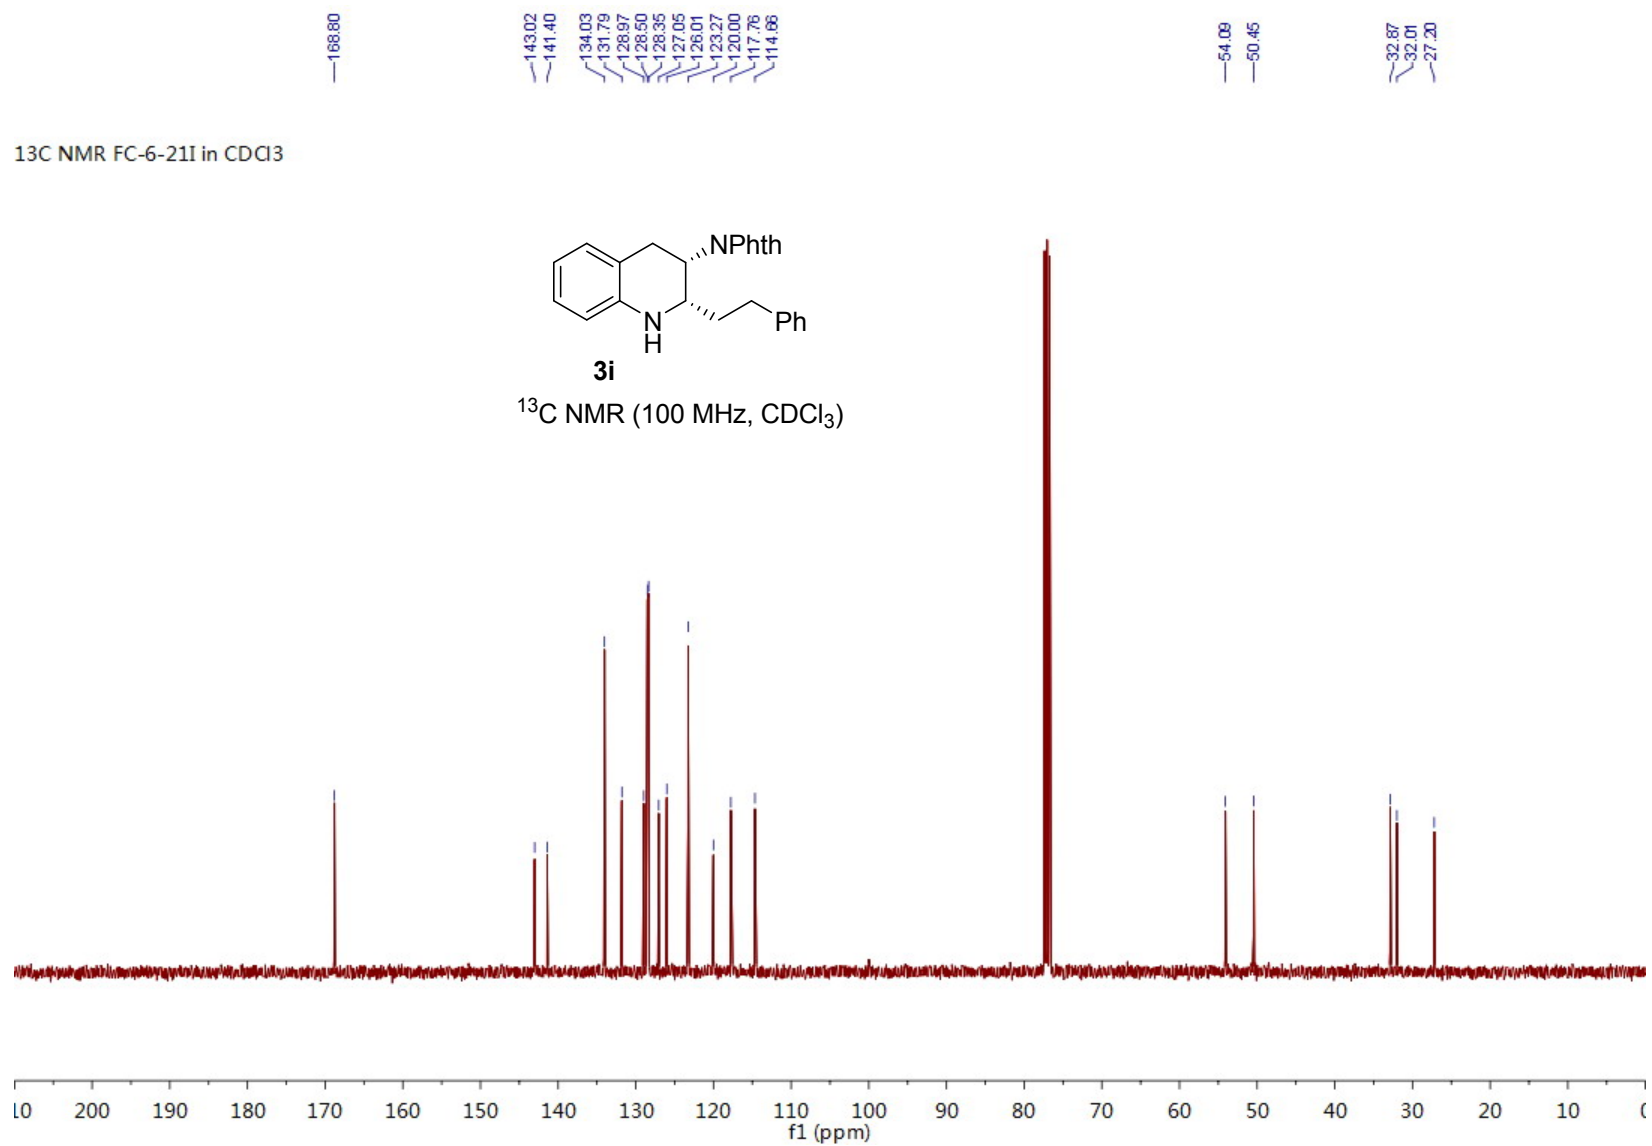



7.8408  
7.8319  
7.8242  
7.8184  
7.8107  
7.8009  
7.7306  
7.7209  
7.7134  
7.7074  
7.6997  
7.6906  
6.7895  
6.7825  
6.7407  
6.7164  
6.5282  
6.5143  
6.5064  
6.4933

4.8201  
4.8113  
4.8003  
4.7941  
4.7881  
4.7744

3.8863  
3.7935  
3.7733  
3.7608  
3.7306

3.4102  
3.3872  
3.1023  
3.0765  
3.0597

1.5167  
1.5041  
1.4888  
1.4814  
1.4712  
1.4474  
1.4369  
1.4300  
1.4257  
1.3285  
1.3084  
1.3037  
1.2902  
1.2731  
0.8399  
0.8359  
0.8309  
0.8269

<sup>1</sup>H NMR FC-6-44A in CDCl<sub>3</sub>  
G:/新 NMR 2014/1845/fid

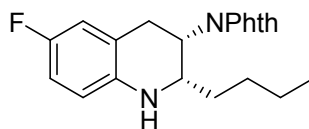

<sup>1</sup>H NMR (400 MHz, CDCl<sub>3</sub>)

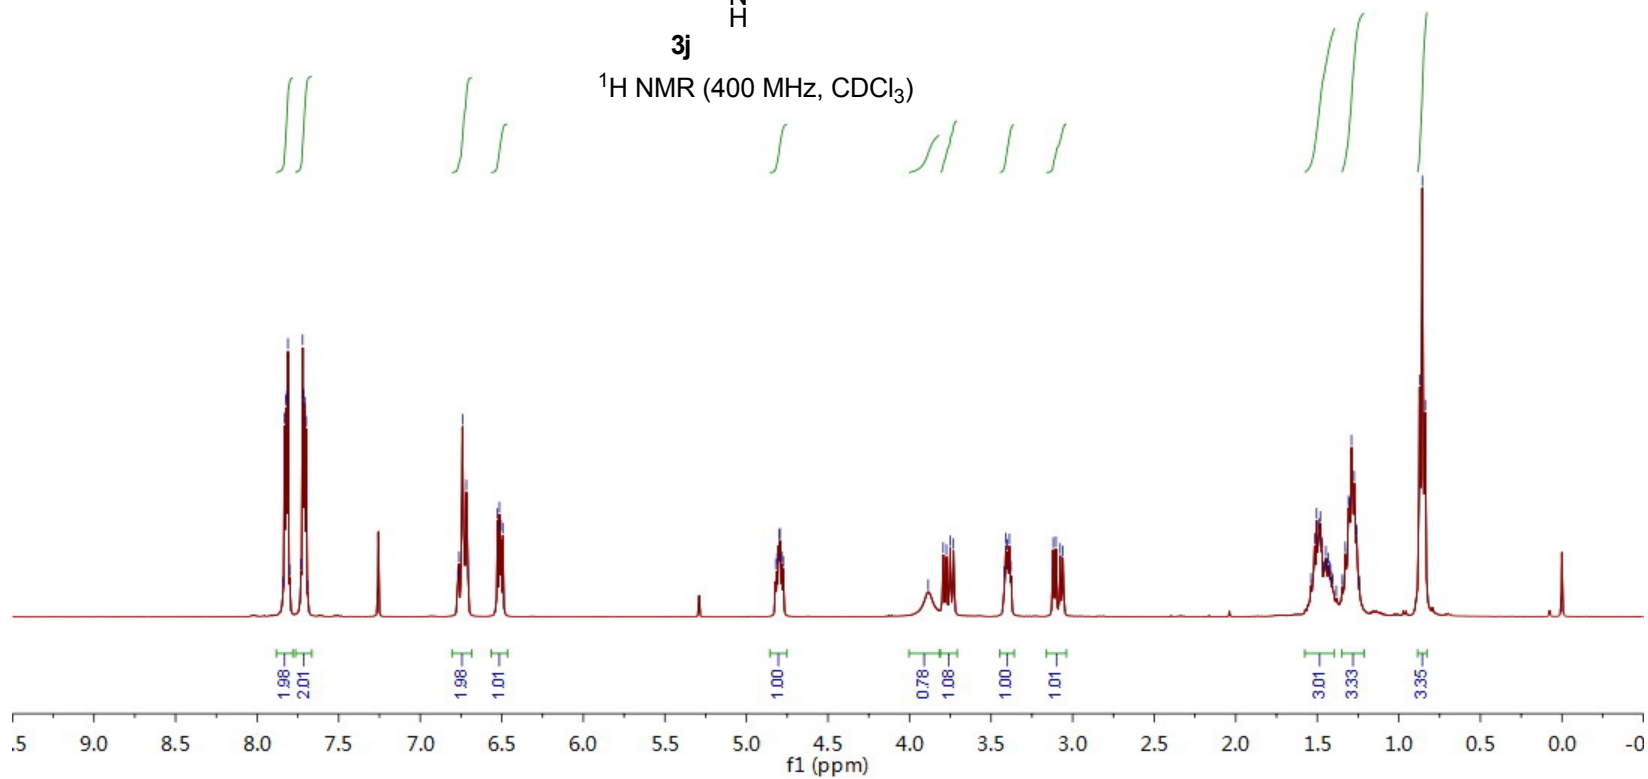

<sup>13</sup>C NMR FC-6-44A in CDCl<sub>3</sub>  
G:/新 NMR 2014/1847/fid

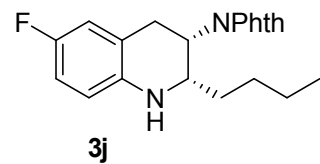

<sup>13</sup>C NMR (100 MHz, CDCl<sub>3</sub>)

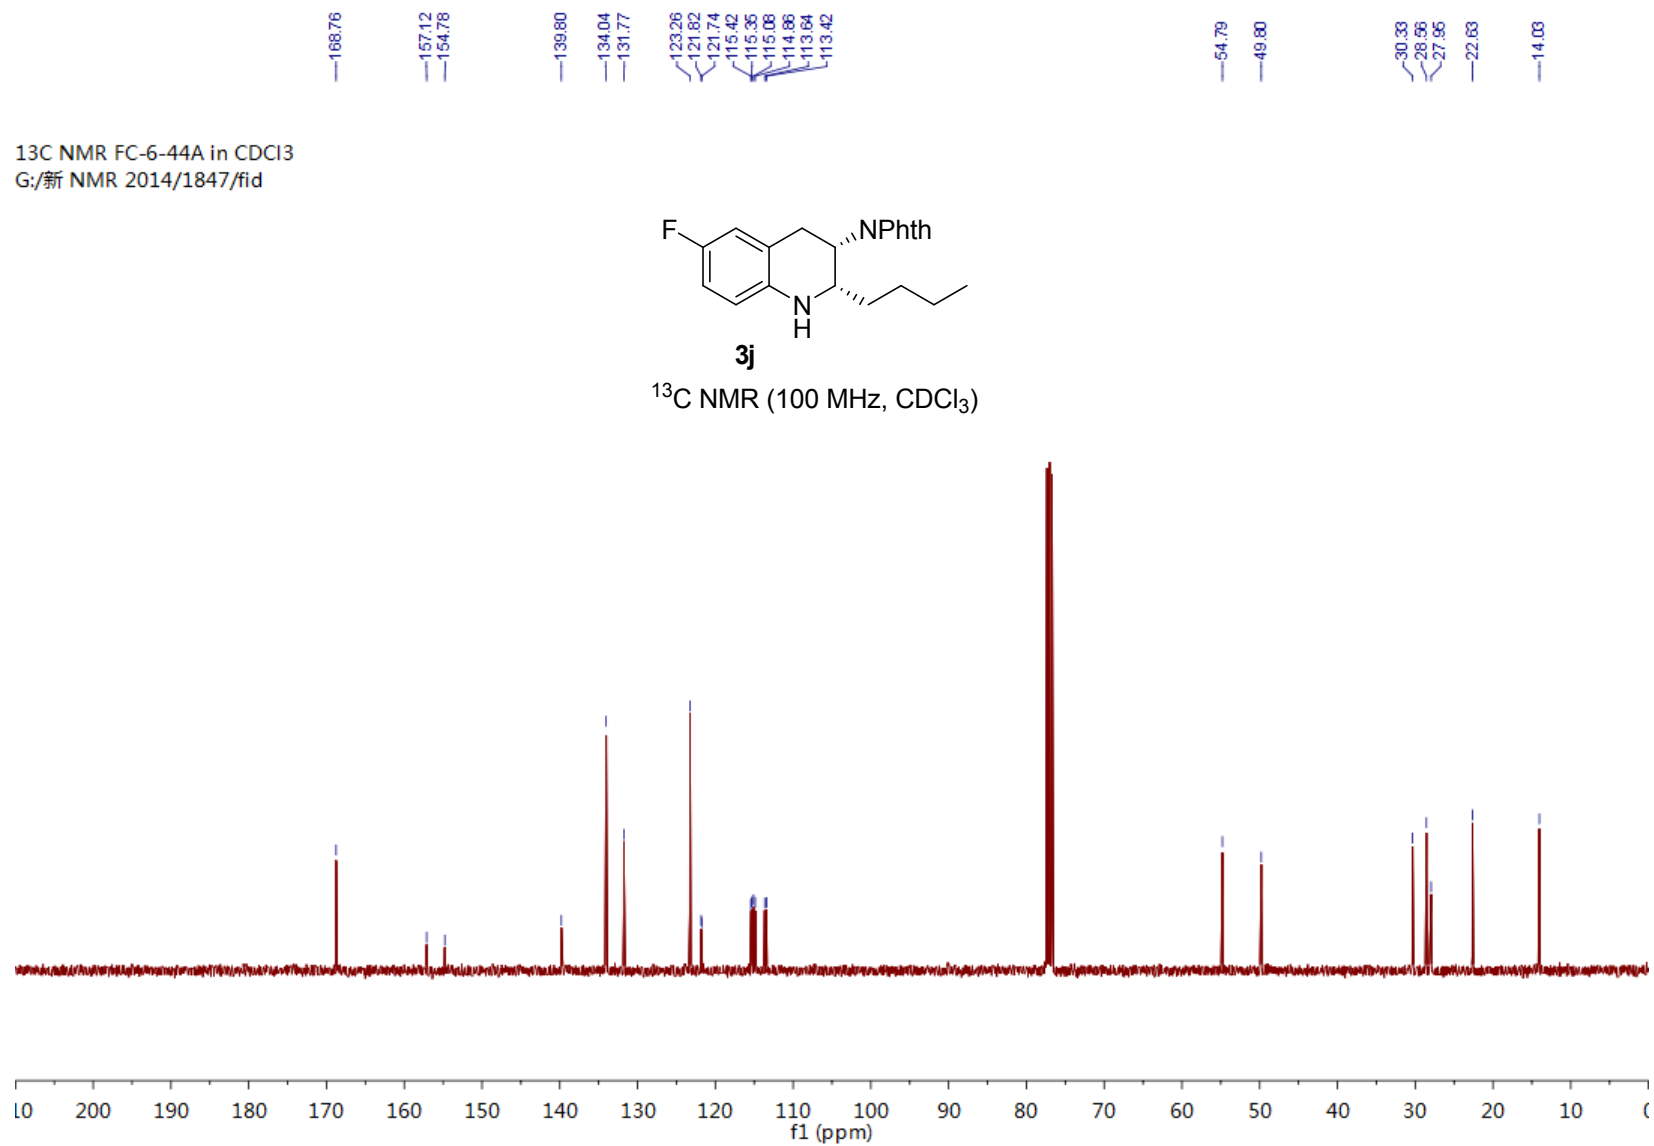

19F NMR FC-6-44A in CDCl3  
G:/新 NMR 2014/1846/fid

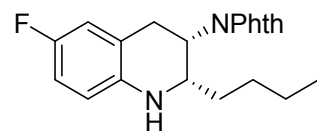

**3j**  
<sup>19</sup>F NMR (376 MHz, CDCl<sub>3</sub>)

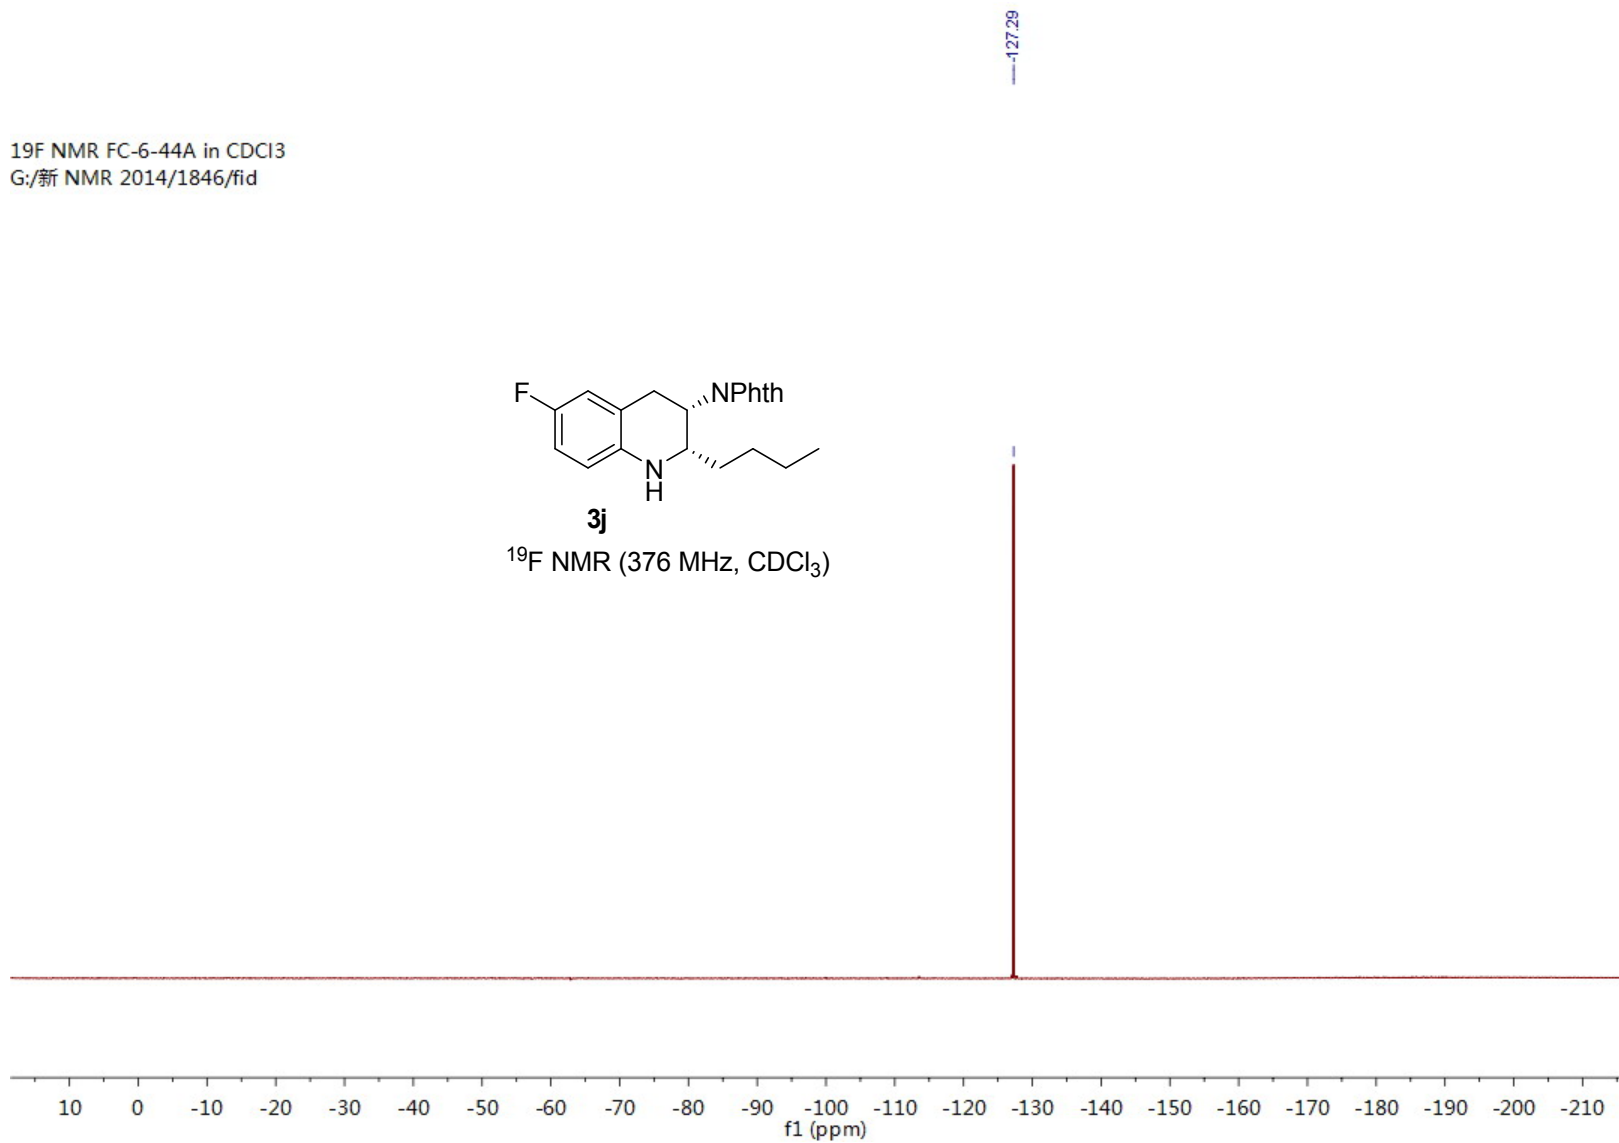

7.7422  
7.7300  
7.7221  
7.7156  
7.7086  
7.6986  
7.6879  
7.6778  
7.6705  
7.6642  
7.6562  
7.6479

7.1854  
7.1478  
7.1419  
7.1389  
6.7184  
6.7001  
6.6258  
6.6060

4.9525  
4.9798  
4.9686  
4.9535  
4.9405  
4.7556  
4.7440

4.3203

3.9827  
3.9560  
3.9420  
3.9153

3.0609  
3.0476  
3.0202  
3.0068

<sup>1</sup>H NMR FC-6-21D in CDCl<sub>3</sub>

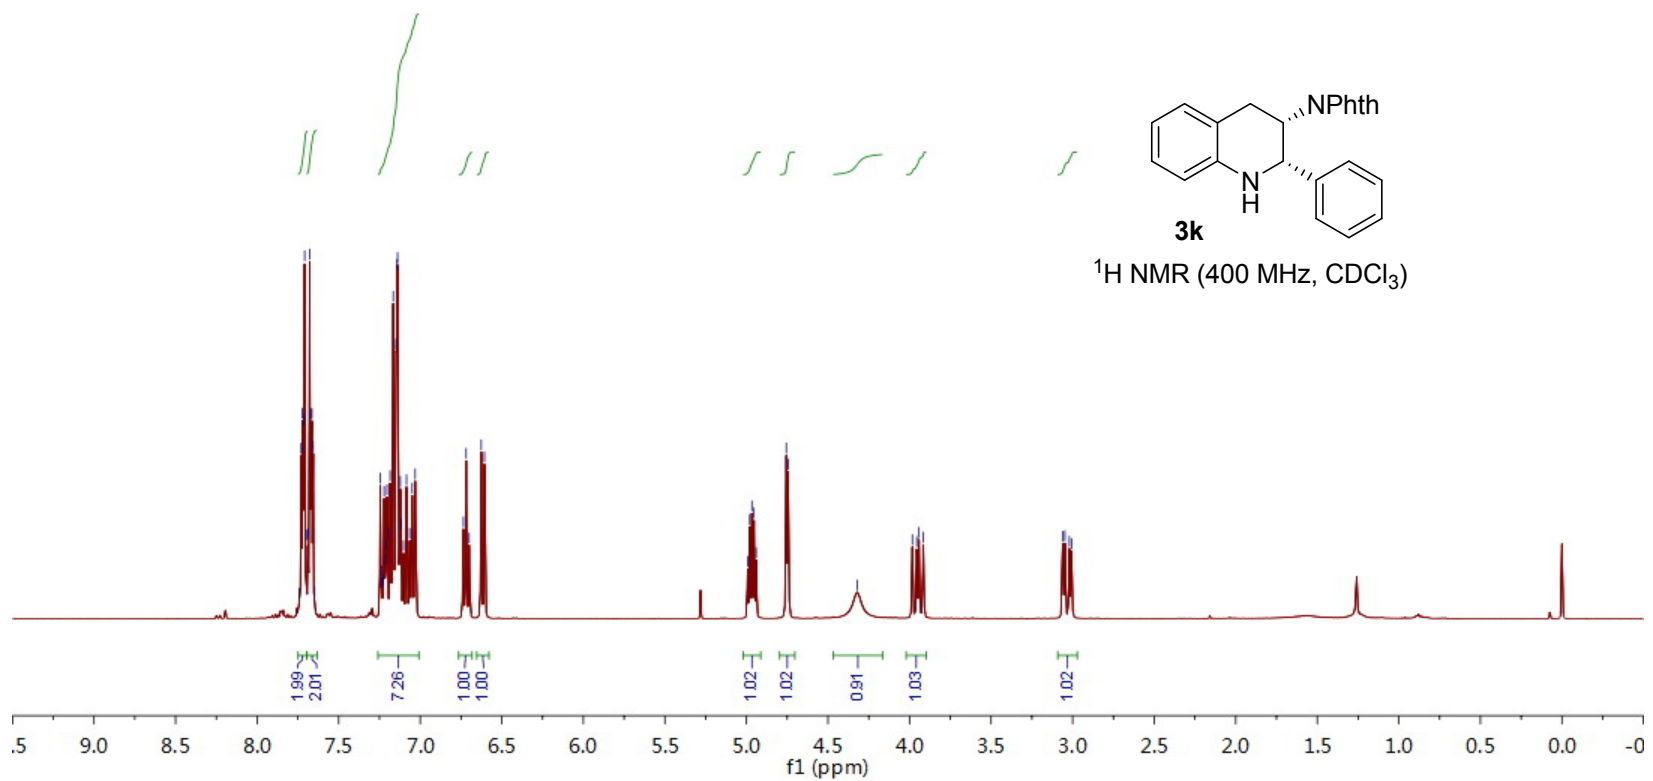

<sup>13</sup>C NMR FC-6-21D in CDCl<sub>3</sub>

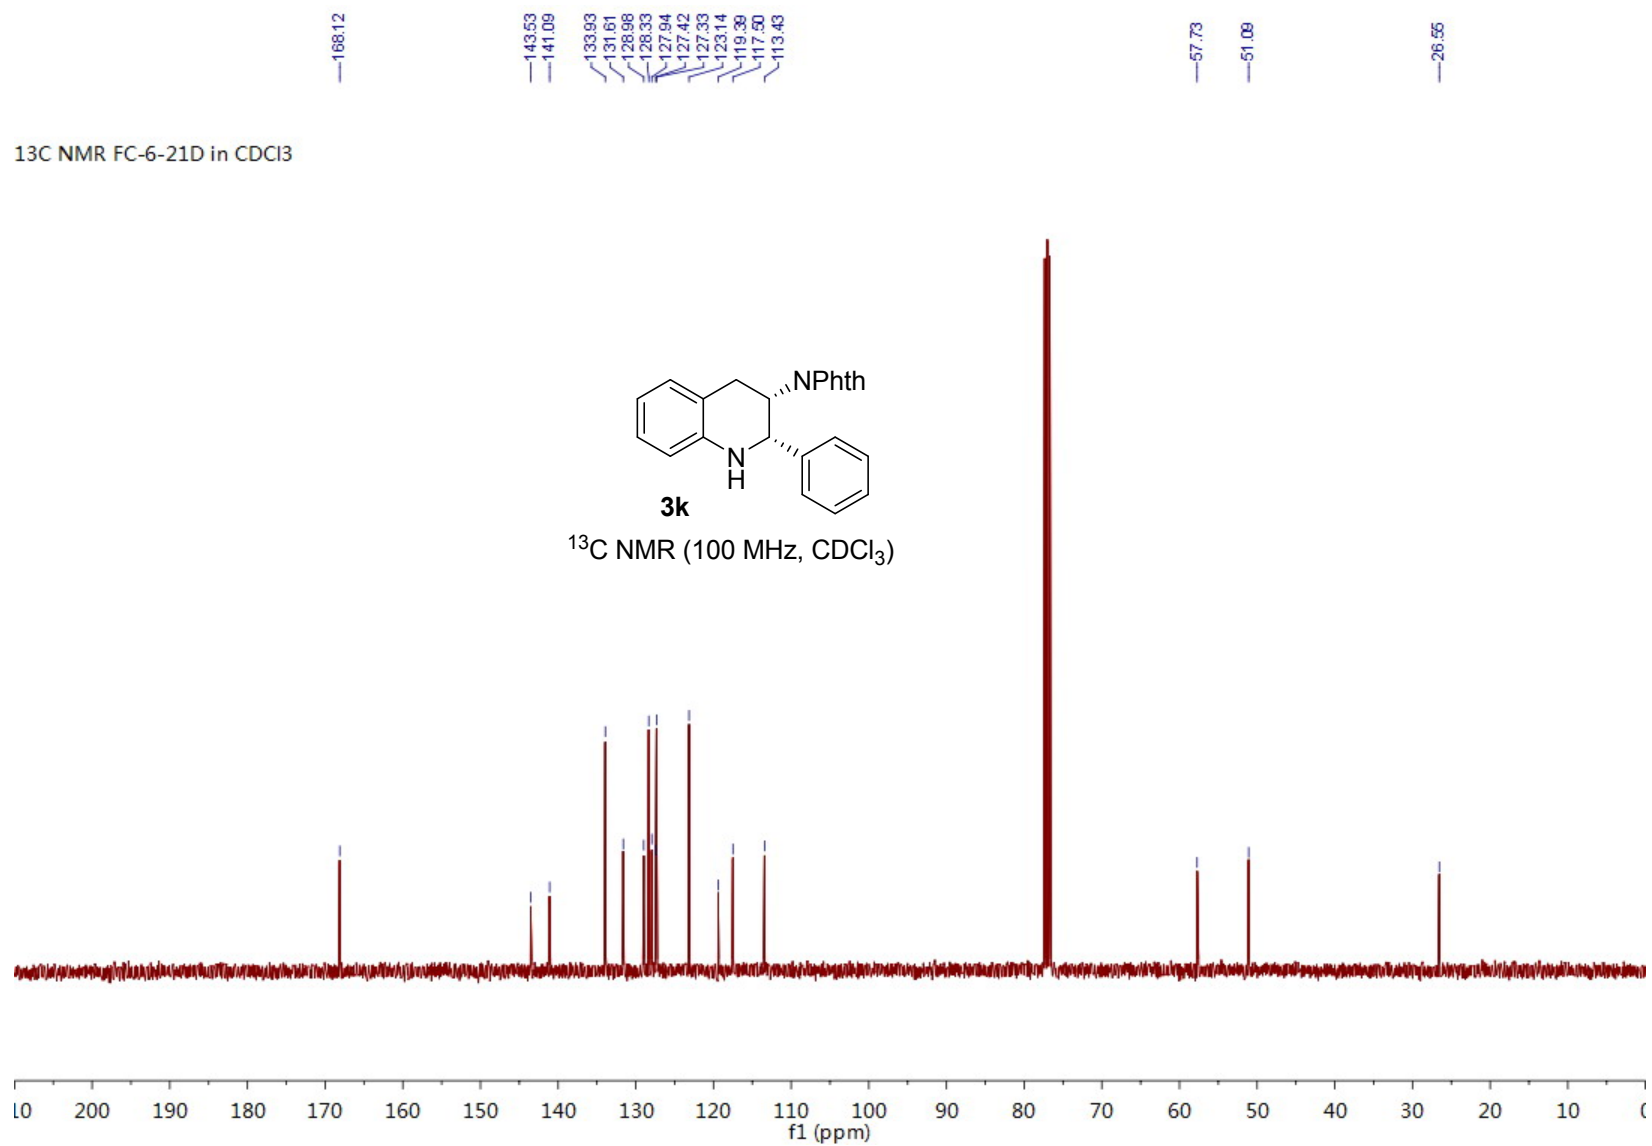

7.8220  
7.8144  
7.8085  
7.8009  
7.7911  
7.7292  
7.7194  
7.7118  
7.7059  
7.6982  
7.0743  
7.0604  
7.0633  
7.0401  
7.0241  
7.0055  
6.9876  
6.8960  
6.8743  
6.8527  
6.7121  
6.6943  
6.6761  
6.5227  
6.5030

4.8337  
4.8242  
4.8184  
4.8090  
4.7986  
4.7908  
4.7843

3.9886  
3.9817  
3.9455  
3.9206  
3.4988  
3.4872  
3.4826  
3.4729  
3.0633  
3.0381  
3.0118  
2.9986  
2.7744  
2.6383  
2.6339  
2.6174  
1.9430  
1.9350  
1.9228  
1.9091  
1.9003  
1.8852  
1.8773  
1.8621  
1.8487  
1.8400  
1.8320  
1.8241  
1.8163  
1.8086  
1.7996  
1.7902  
1.7824  
1.7744  
1.7656

<sup>1</sup>H NMR FC-6-30A in CDCl<sub>3</sub>

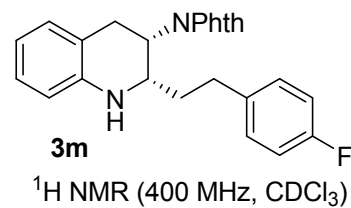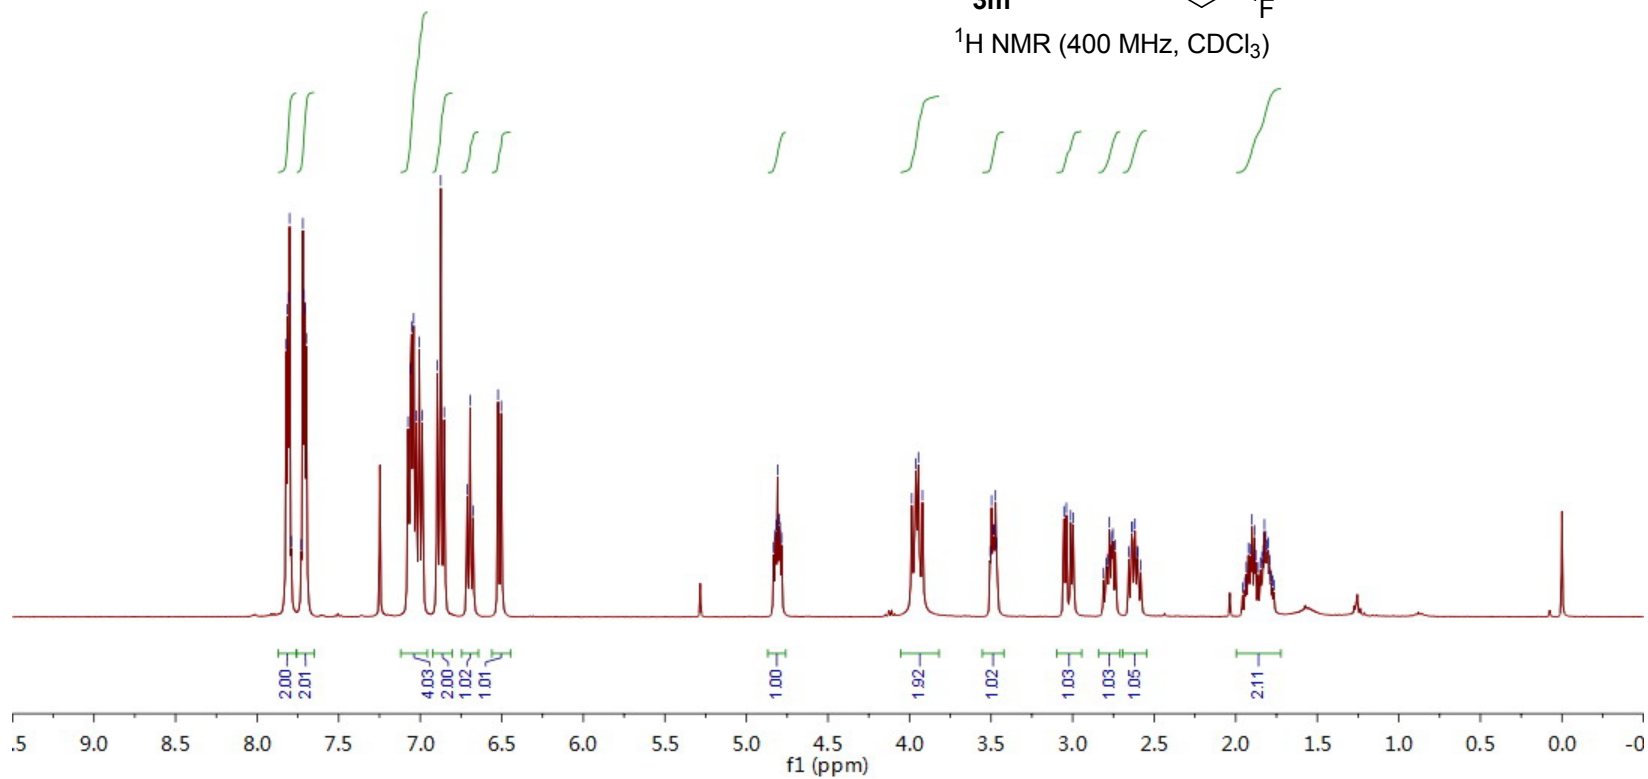

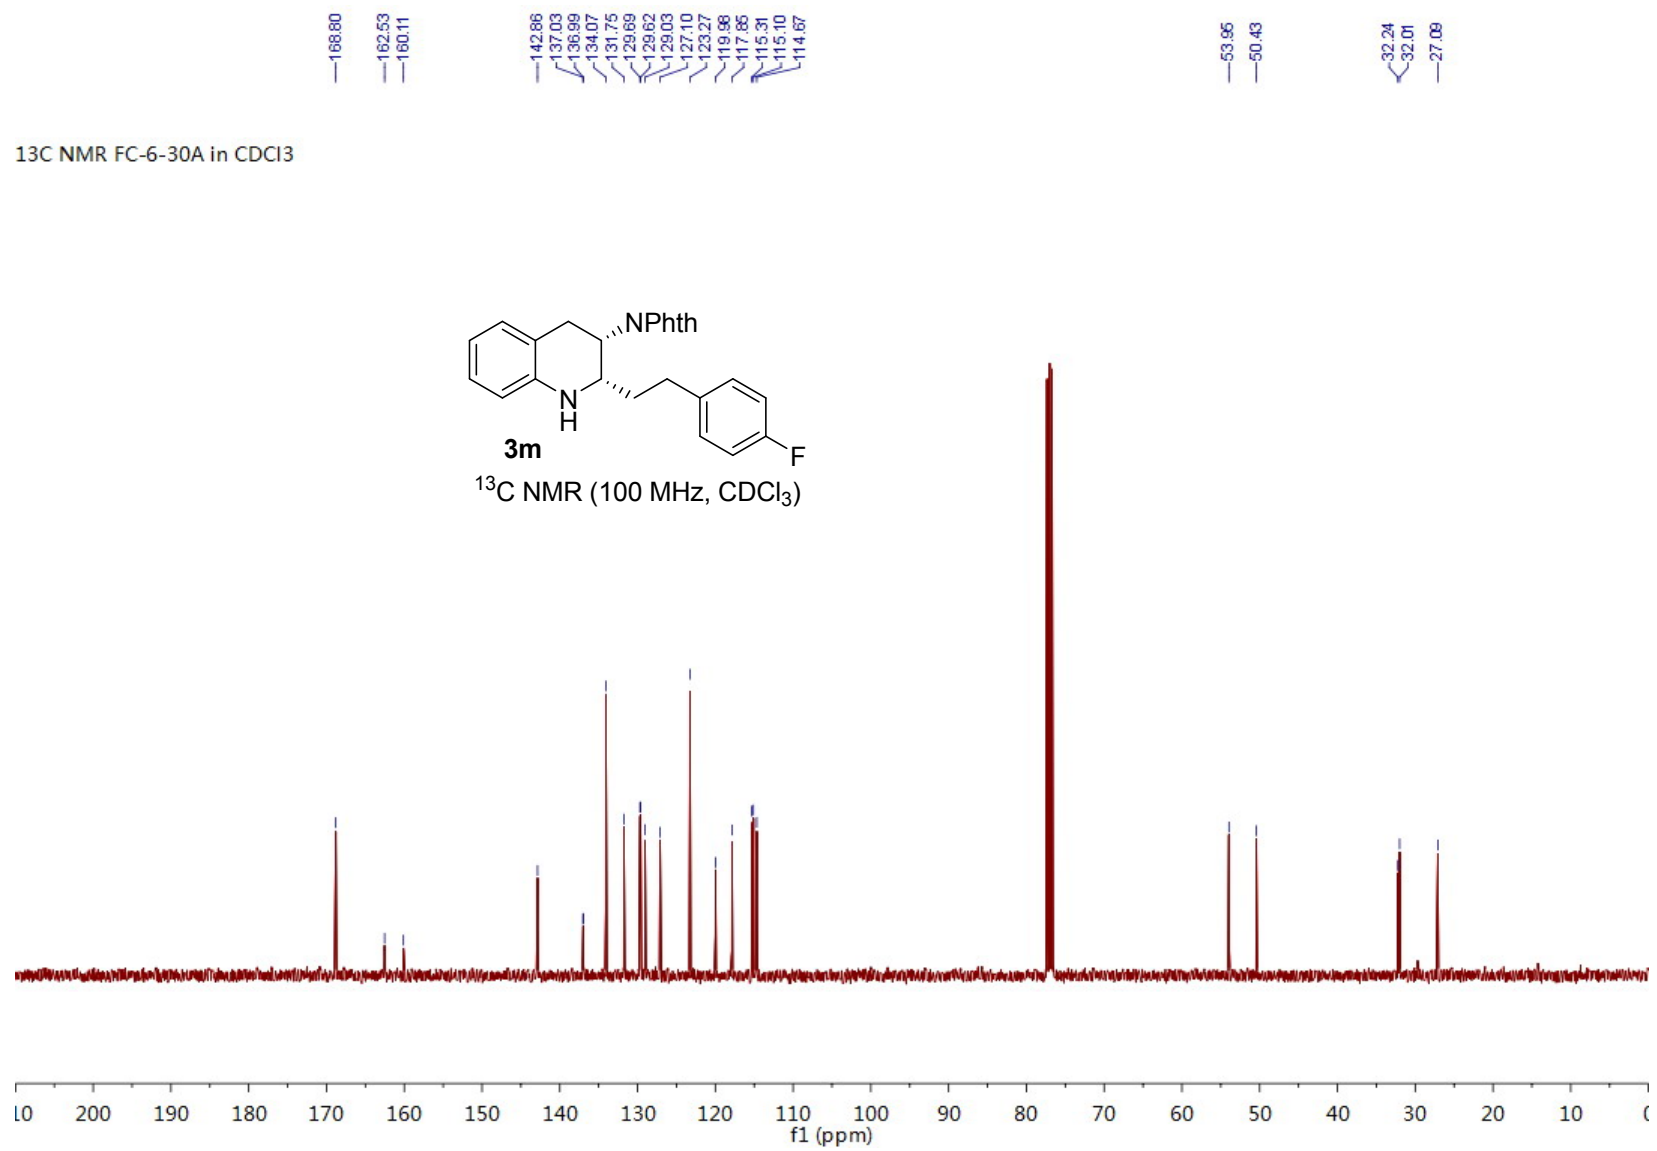

<sup>19</sup>F NMR FC-6-30A in CDCl<sub>3</sub>

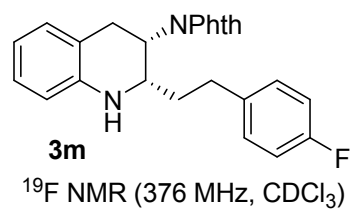

—117.36

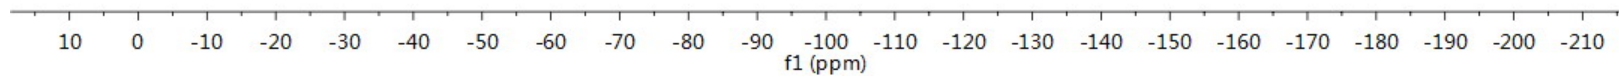



7.0184  
6.9999  
6.9820  
6.9631  
6.8660  
6.6407  
6.6242  
6.6222  
6.5089  
6.4882

4.1275  
4.1108  
4.1007  
4.0937  
4.0840  
4.0771  
4.0674  
4.0606  
4.0504  
4.0338  
3.8884  
3.8789  
3.8733  
3.8629  
3.8572  
3.8467  
3.8307

3.0855  
3.0641  
3.0506  
3.0286  
2.9666  
2.9742  
2.9644  
2.9513  
2.9431  
2.9288  
2.9006  
2.9112  
1.6881  
1.6657  
1.6476  
1.6303  
1.6124  
1.1497  
1.1333  
0.9564  
0.9369  
0.9183

<sup>1</sup>H NMR FC-6-25D2 in CDCl<sub>3</sub>

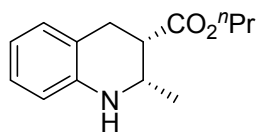

<sup>1</sup>H NMR (400 MHz, CDCl<sub>3</sub>)

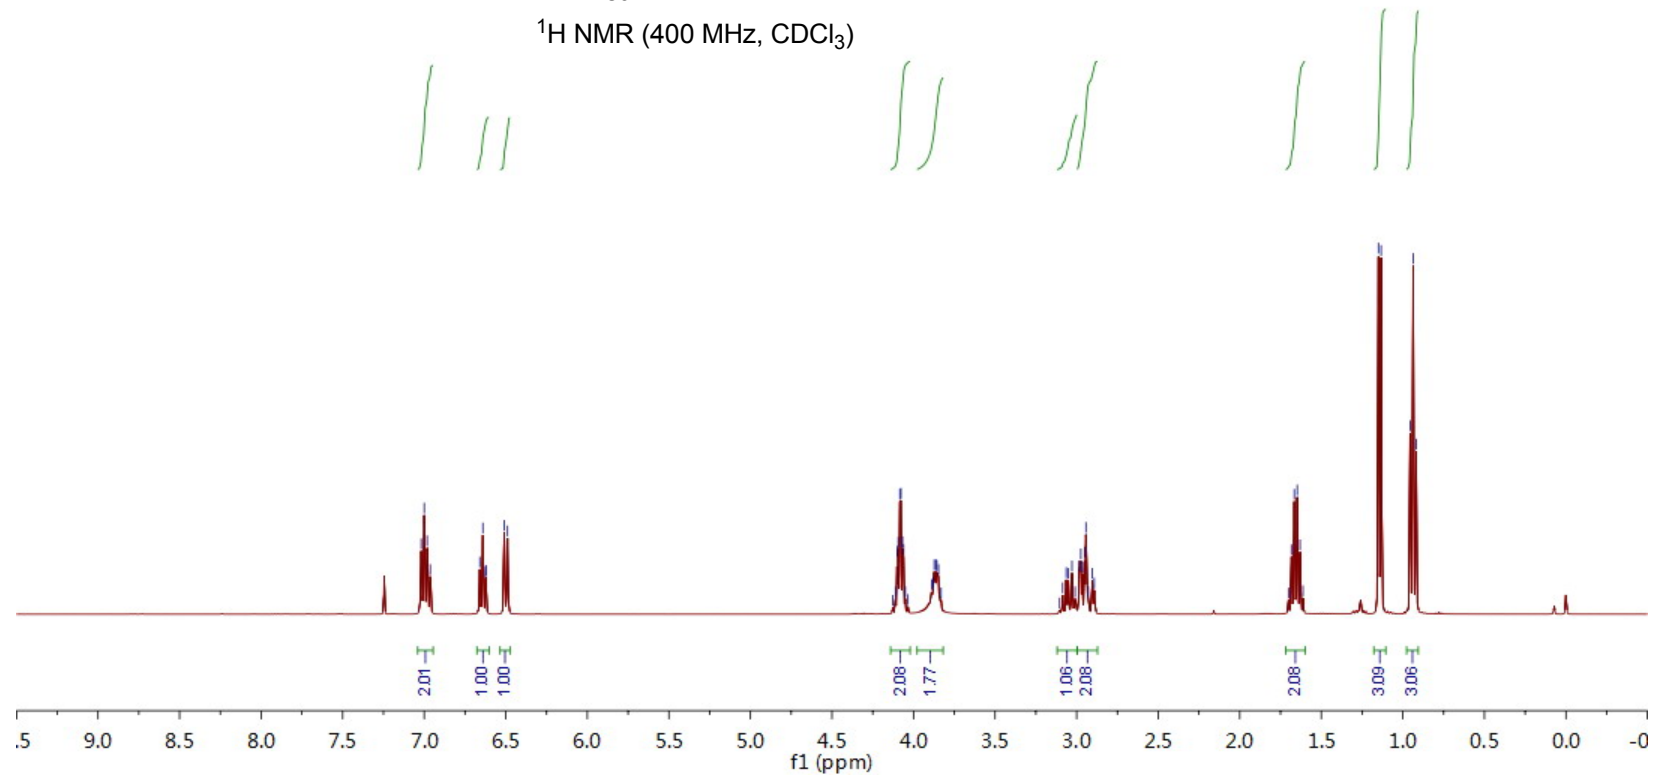

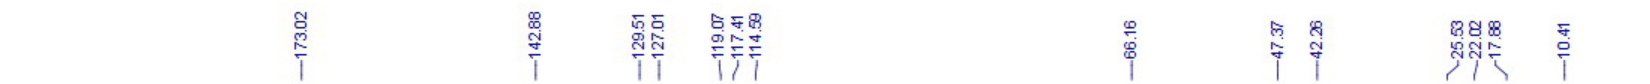

<sup>13</sup>C NMR FC-6-25D2 in CDCl<sub>3</sub>

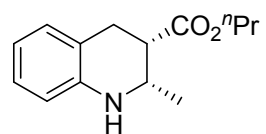

**8a**

<sup>13</sup>C NMR (100 MHz, CDCl<sub>3</sub>)

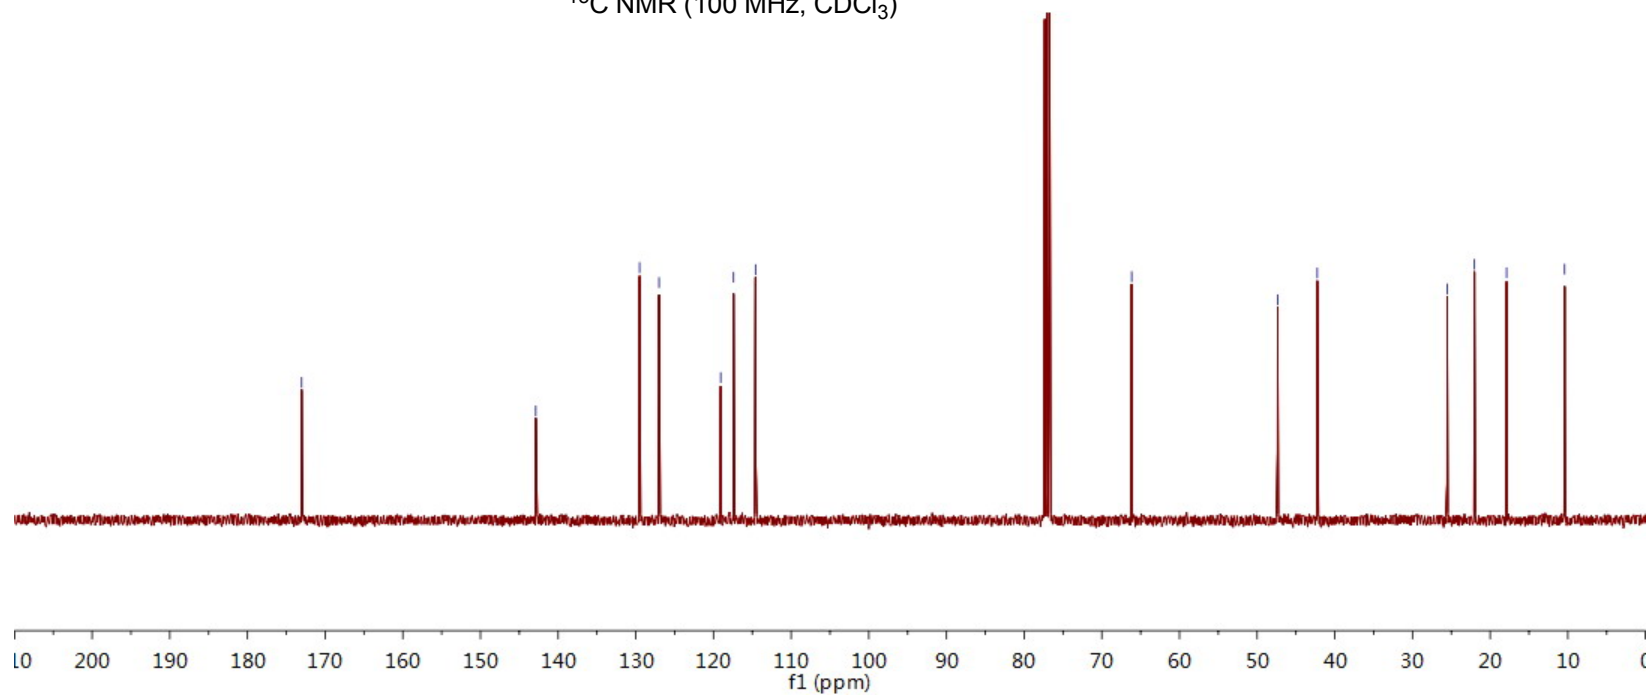

<sup>1</sup>H NMR FC-6-25D1 in CDCl<sub>3</sub>

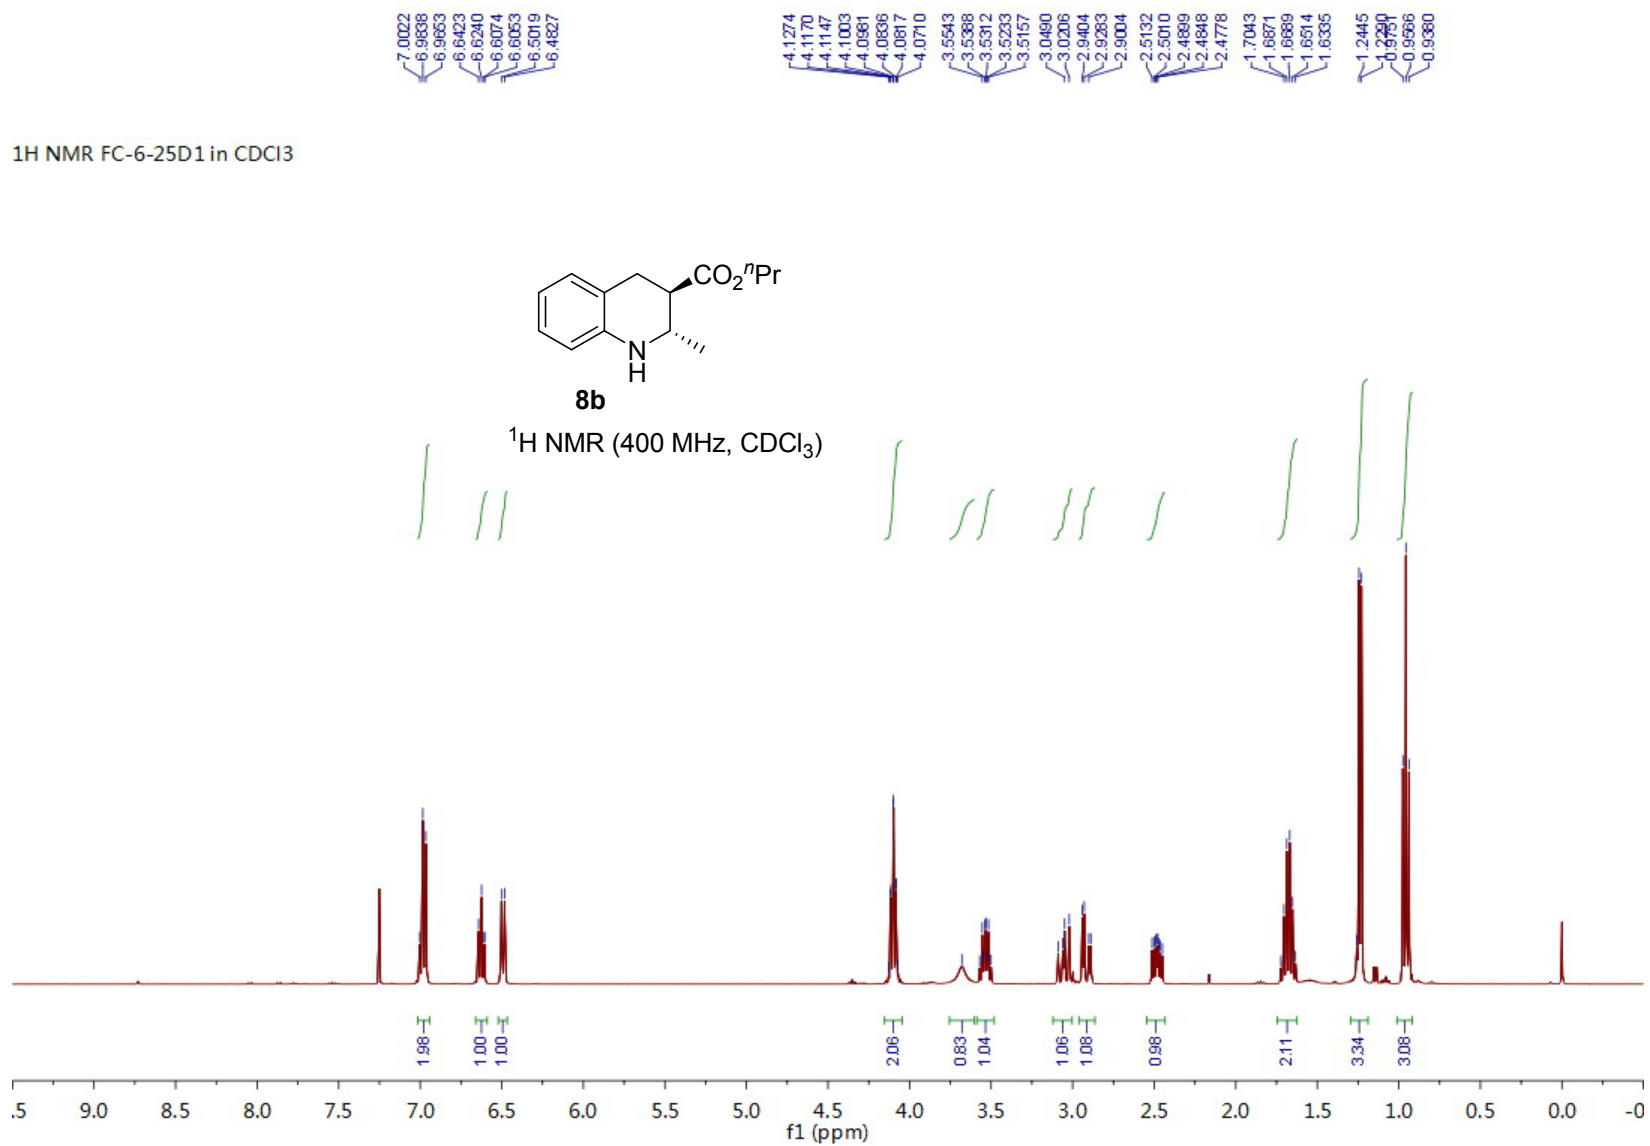

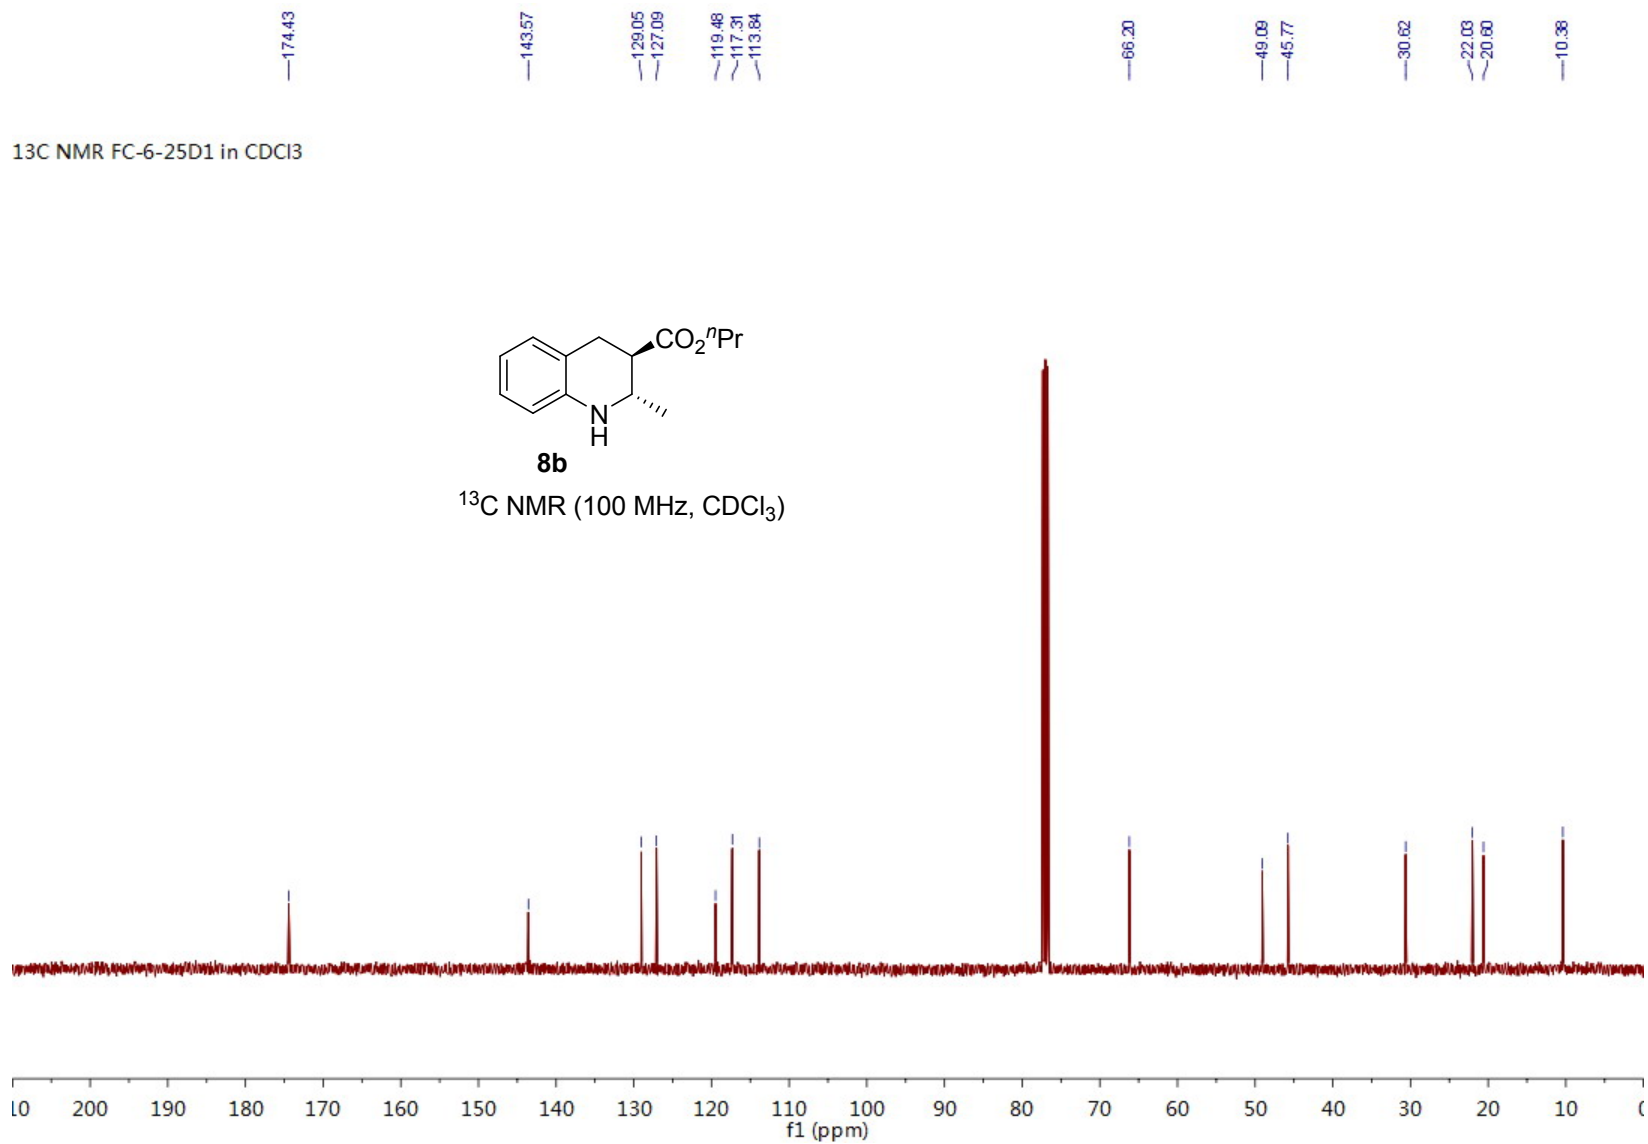

7.7301  
7.7096  
7.2815  
7.2612  
7.0004  
6.9817  
6.9629  
6.7759  
6.7573  
6.6532  
6.6350  
6.6167  
6.4876  
6.4678  
4.8789  
4.8560  
3.7430  
3.7367  
3.7317  
3.7247  
3.7203  
3.6047  
3.2017  
3.1886  
3.1681  
2.8501  
2.8492  
2.8483  
2.5869  
2.5807  
2.5465  
2.4247  
1.3055  
1.2573  
1.2104  
1.1990  
1.1885  
1.1750  
1.1573  
1.1425  
1.1322  
1.1281  
1.1251  
0.8367  
0.8192

1H NMR FC-6-44C1 inCDCl3  
G:/新 NMR 2014/2082/fid

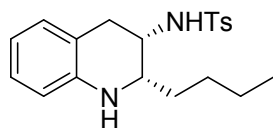

<sup>1</sup>H NMR (400 MHz, CDCl<sub>3</sub>)

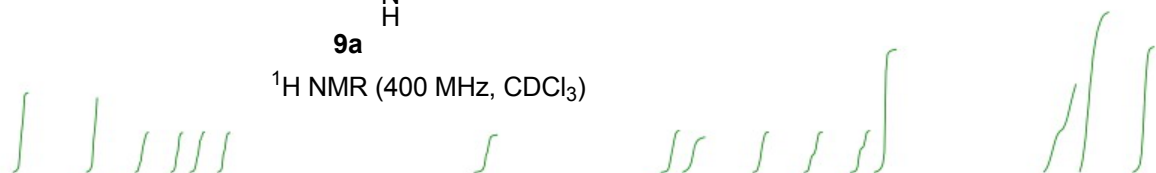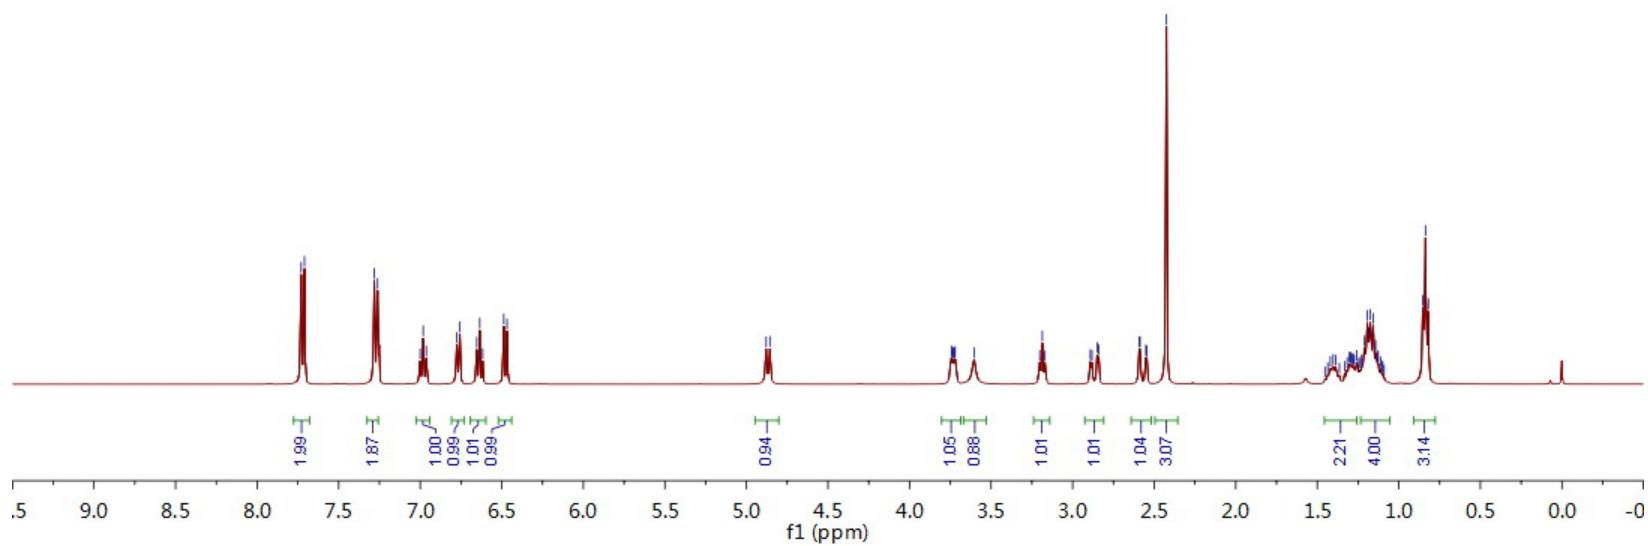

<sup>13</sup>C NMR FC-6-44C1 in CDCl<sub>3</sub>  
G:/新 NMR 2014/2083/fid

143.50  
143.16  
136.77  
130.48  
129.59  
127.28  
126.98  
118.48  
117.83  
114.22

54.84  
48.38  
34.33  
31.70  
27.86  
22.84  
21.49  
13.88

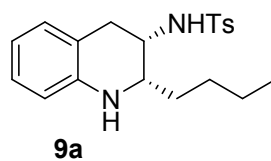

<sup>13</sup>C NMR (100 MHz, CDCl<sub>3</sub>)

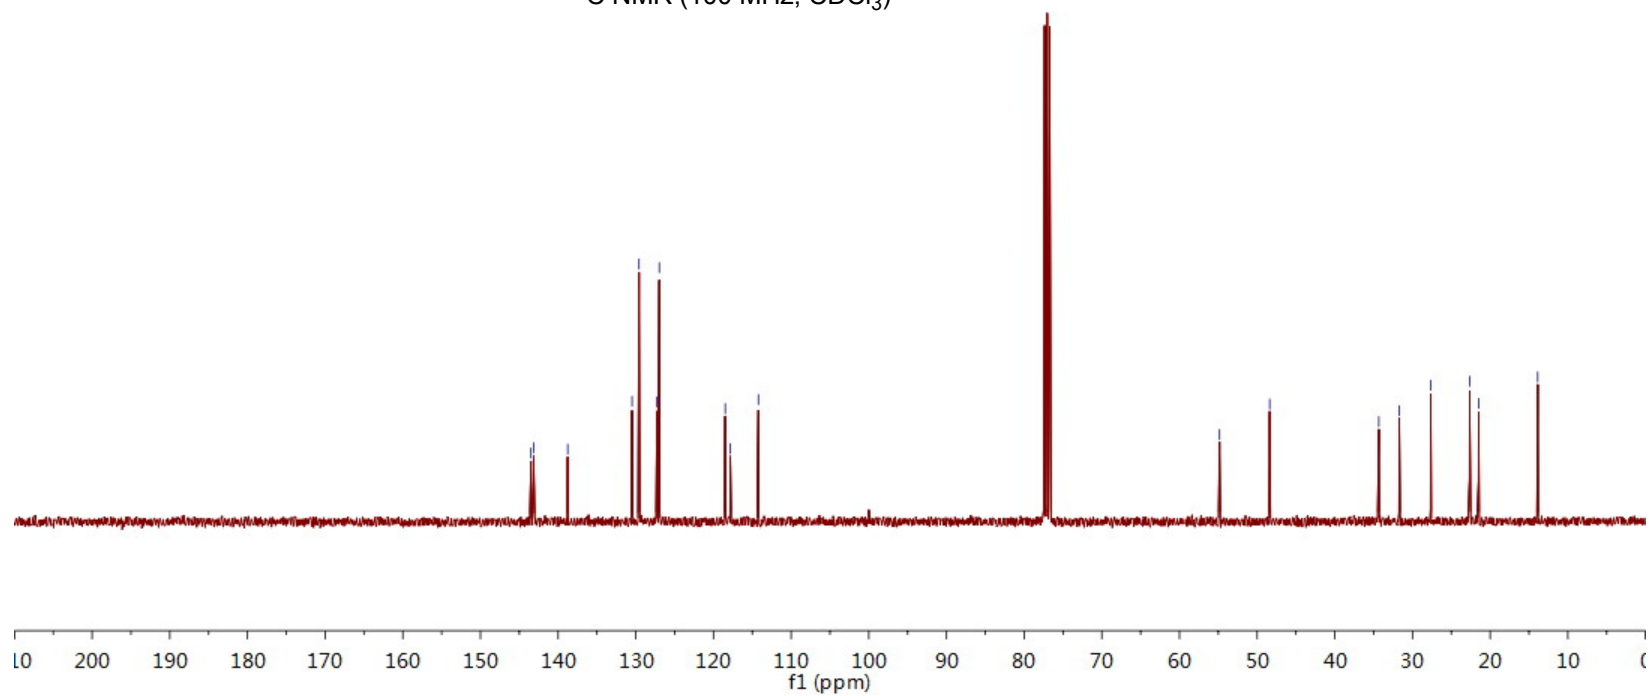

<sup>1</sup>H NMR FC-6-44C2 in CDCl<sub>3</sub>  
//Yzc/g/新 NMR 2013/1359/fid

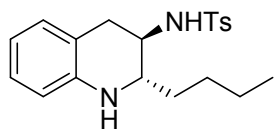

<sup>1</sup>H NMR (400 MHz, CDCl<sub>3</sub>)

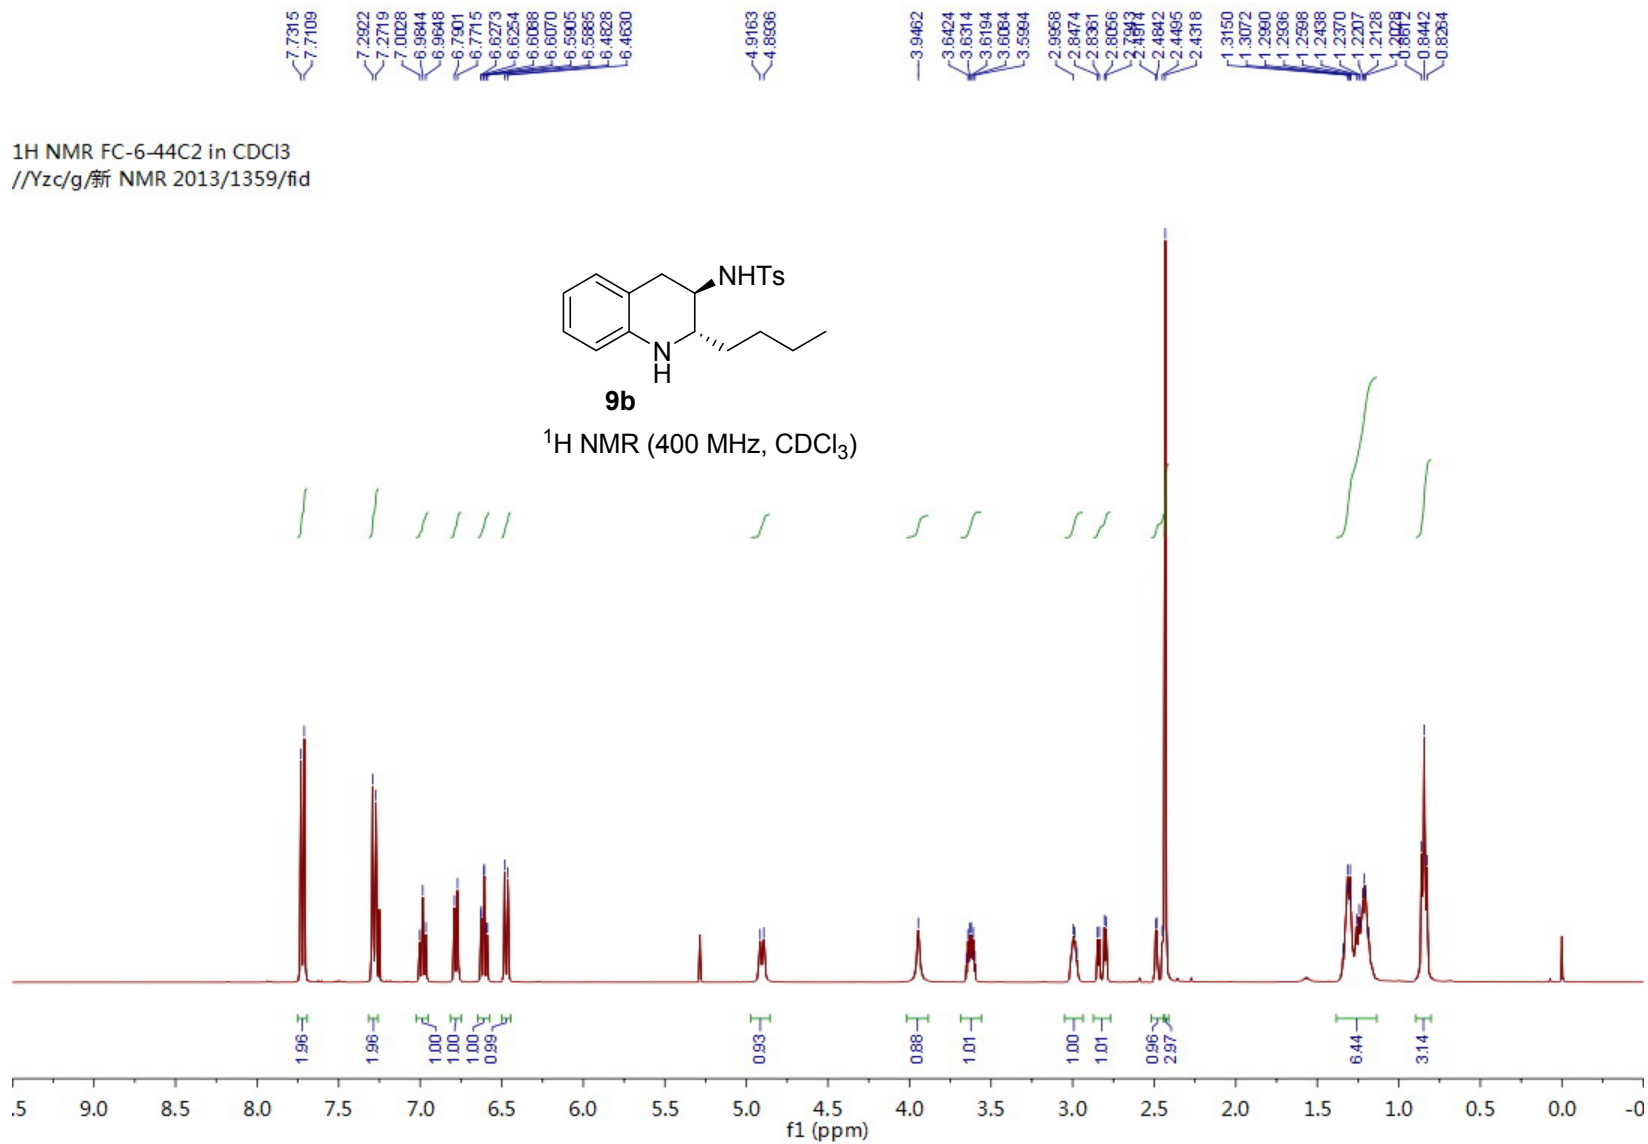

143.26  
142.03  
138.64  
130.29  
129.66  
127.48  
126.93  
117.70  
116.48  
114.31

55.05  
49.01

33.84  
29.72  
27.74  
22.42  
21.50  
13.94

<sup>13</sup>C NMR FC-6-44C2 in CDCl<sub>3</sub>  
//Yzc/g/新 NMR 2013/1360/fid

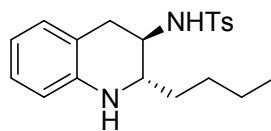

<sup>13</sup>C NMR (100 MHz, CDCl<sub>3</sub>)

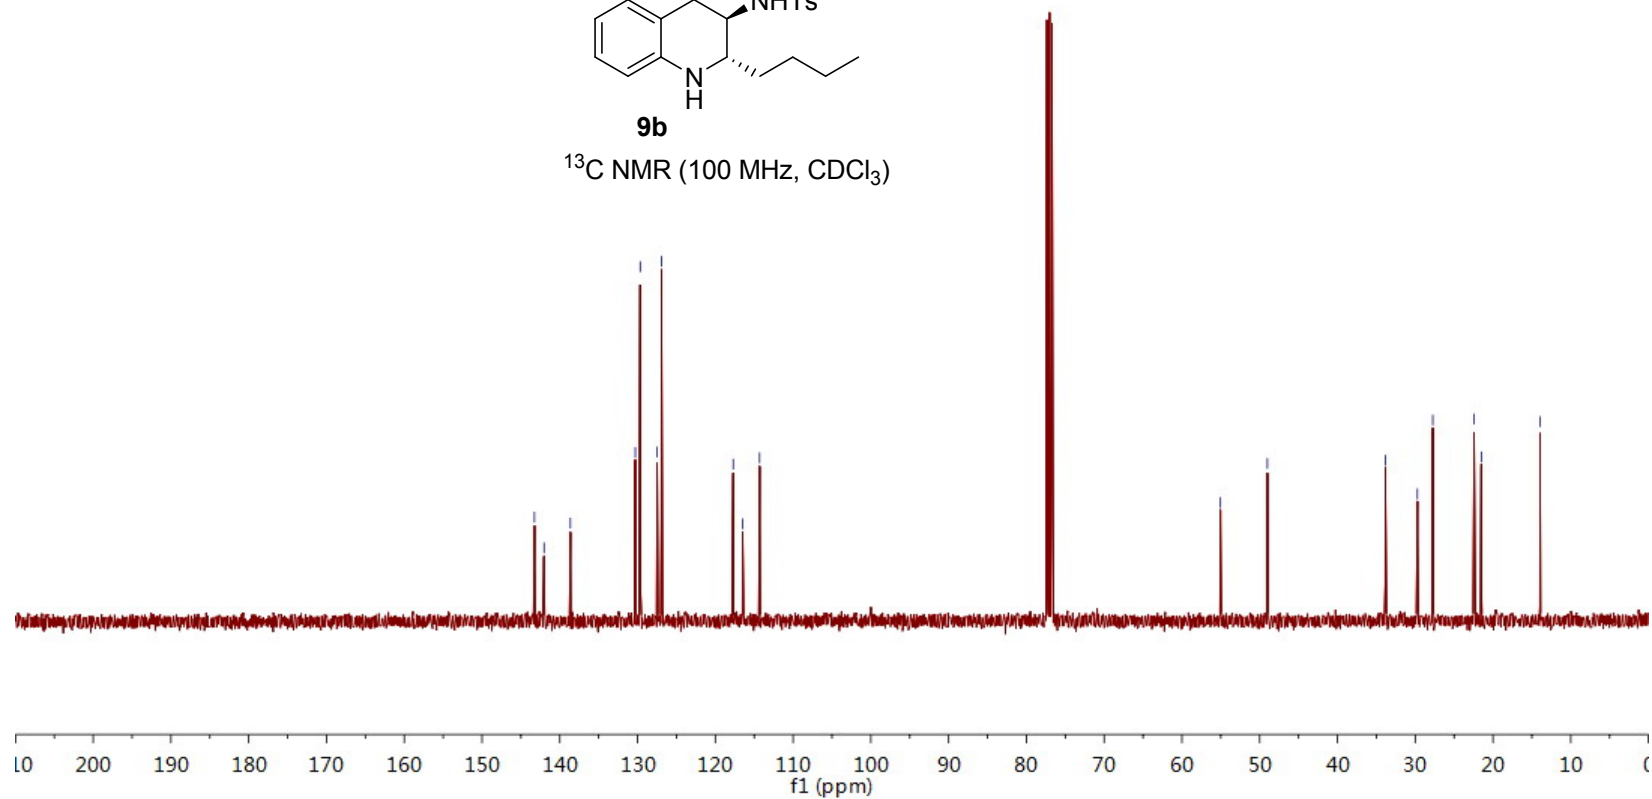



<sup>1</sup>H NMR FC-6-44D in CDCl<sub>3</sub>  
G:/新 NMR 2014/1850/fid

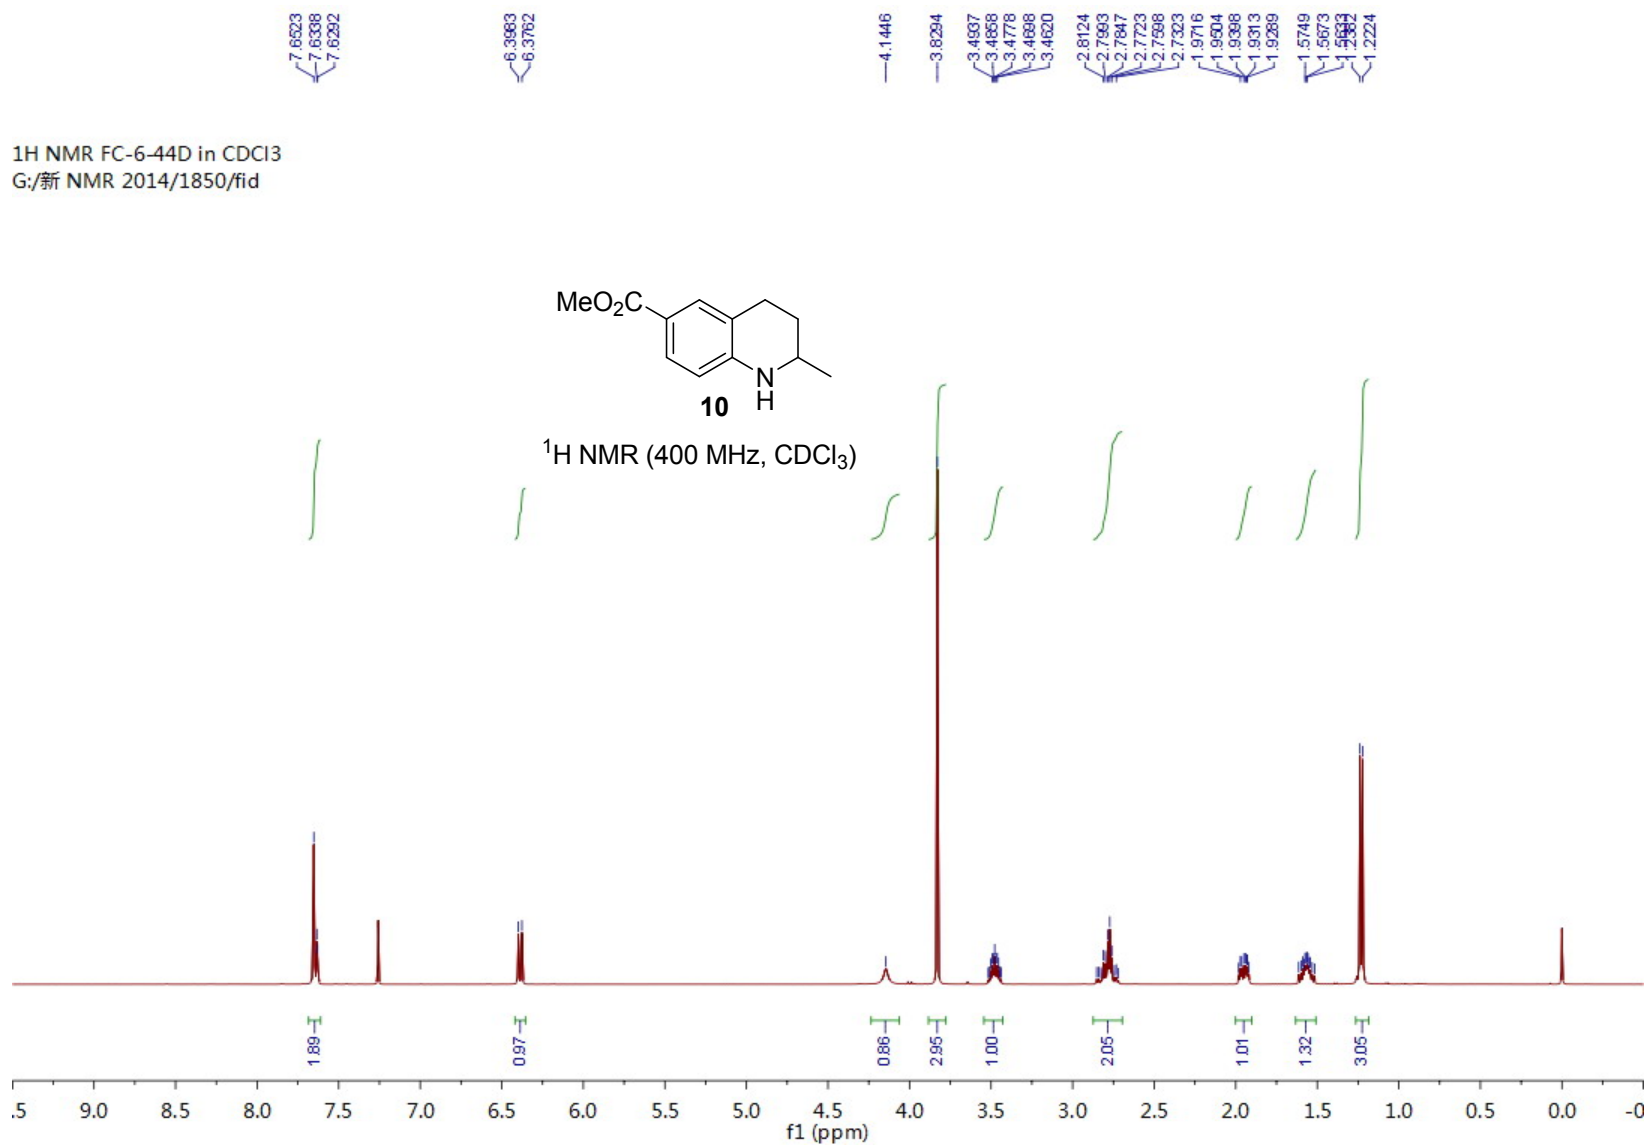

<sup>13</sup>C NMR FC-6-44D in CDCl<sub>3</sub>  
G:/新 NMR 2014/1851/fid

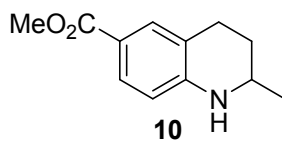

<sup>13</sup>C NMR (100 MHz, CDCl<sub>3</sub>)

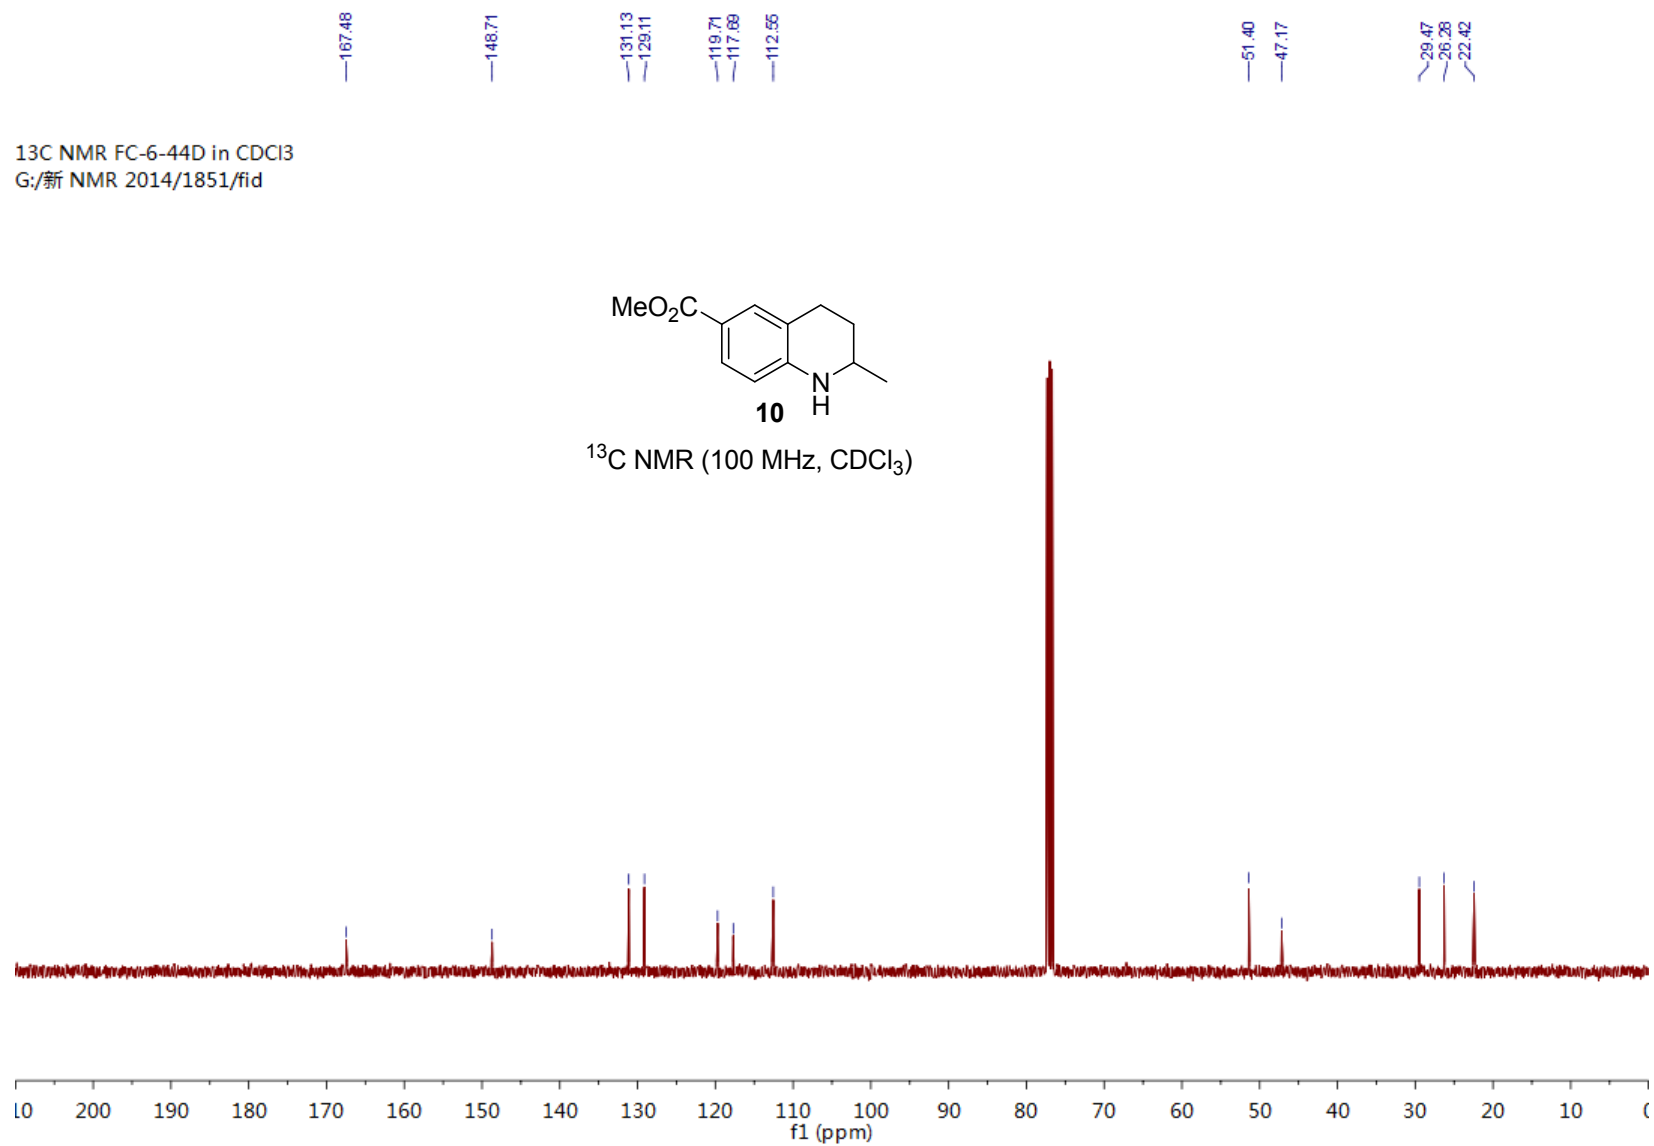

Data File C:\FC-2\YZN002874.D  
 Sample Name: FC-4-91D

=====  
 Acq. Operator : WH  
 Acq. Instrument : Instrument 1 Location : Vial 1  
 Injection Date : 5/25/2013 3:34:54 PM  
 Acq. Method : C:\CHEM32\1\METHODS\DEF LC.M  
 Last changed : 5/25/2013 3:18:43 PM by WH  
 (modified after loading)  
 Analysis Method : C:\CHEM32\1\METHODS\DEF LC.M  
 Last changed : 10/24/2013 8:18:08 PM by B  
 (modified after loading)  
 Sample Info : OD-H, H/i-PrOH = 70/30, 0.7 mL/min, 30 oC, 254nm

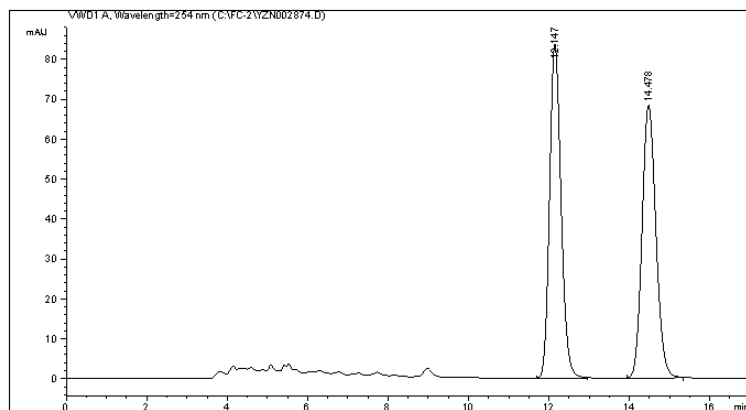

=====  
 Area Percent Report  
 =====

Sorted By : Signal  
 Multiplier: : 1.0000  
 Dilution: : 1.0000  
 Use Multiplier & Dilution Factor with ISTDs

Signal 1: VWD1 A, Wavelength=254 nm

| Peak # | RetTime [min] | Type | Width [min] | Area mAU *s | Height [mAU] | Area %  |
|--------|---------------|------|-------------|-------------|--------------|---------|
| 1      | 12.147        | BB   | 0.3050      | 1655.66174  | 83.72147     | 50.3159 |
| 2      | 14.478        | BB   | 0.3708      | 1634.87048  | 68.35770     | 49.6841 |

Totals : 3290.53223 152.07918

=====  
 \*\*\* End of Report \*\*\*

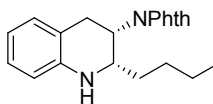

*cis-(±)-3a*

Data File C:\FC-4 PD\YZ005160.D  
 Sample Name: FC-6-19B

=====  
 Acq. Operator : ZHOU  
 Acq. Instrument : Instrument 1 Location : Vial 1  
 Injection Date : 11/3/2013 7:47:45 AM  
 Acq. Method : C:\HPCHEM\1\METHODS\DEMOCAL2.M  
 Last changed : 11/3/2013 5:56:48 AM by ZHOU  
 (modified after loading)  
 Analysis Method : C:\CHEM32\1\METHODS\DEF LC.M  
 Last changed : 3/19/2014 1:42:02 PM by Z  
 (modified after loading)  
 Sample Info : OD-H, H/i-PrOH = 70/30 0.7 mL/min, 30 oC, 254 nm

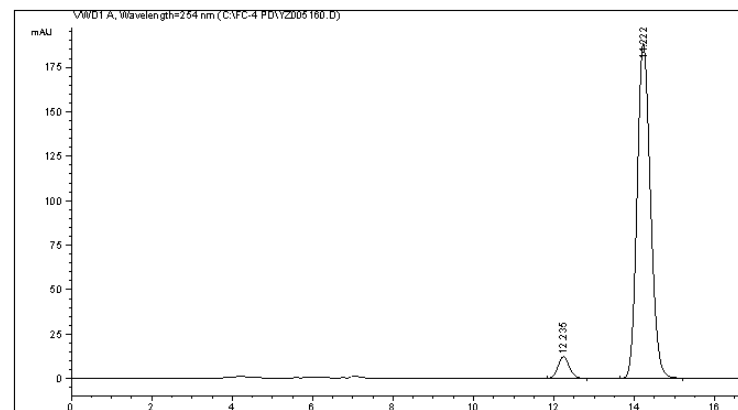

=====  
 Area Percent Report  
 =====

Sorted By : Signal  
 Multiplier: : 1.0000  
 Dilution: : 1.0000  
 Use Multiplier & Dilution Factor with ISTDs

Signal 1: VWD1 A, Wavelength=254 nm

| Peak # | RetTime [min] | Type | Width [min] | Area mAU *s | Height [mAU] | Area %  |
|--------|---------------|------|-------------|-------------|--------------|---------|
| 1      | 12.235        | BB   | 0.3061      | 240.73900   | 12.19050     | 5.2448  |
| 2      | 14.222        | BB   | 0.3585      | 4349.30615  | 188.11835    | 94.7552 |

Totals : 4590.04515 200.30884

=====  
 \*\*\* End of Report \*\*\*

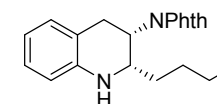

*cis-(-)-3a*

Data File C:\FC-2\YZM002943.D  
 Sample Name: FC-5-12E

=====  
 Acq. Operator : WH  
 Acq. Instrument : Instrument 1 Location : Vial 1  
 Injection Date : 6/8/2013 4:41:20 PM  
 Acq. Method : C:\CHEM32\1\METHODS\DEF.LC.M  
 Last changed : 6/8/2013 4:18:00 PM by WH  
 (modified after loading)  
 Analysis Method : C:\CHEM32\1\METHODS\DEF.LC.M  
 Last changed : 10/9/2013 10:14:04 PM by B  
 (modified after loading)  
 Sample Info : OD-H, H/i-PrOH = 70/30, 0.7 mL/min, 30 oC, 254nm

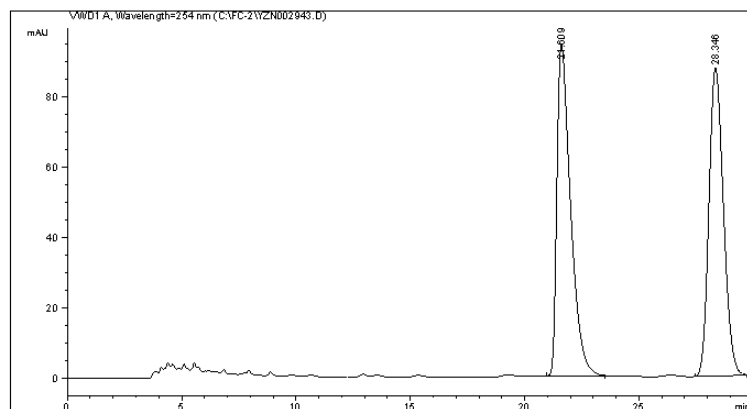

=====  
 Area Percent Report  
 =====

Sorted By : Signal  
 Multiplier: : 1.0000  
 Dilution: : 1.0000  
 Use Multiplier & Dilution Factor with ISTDs

Signal 1: VWD1 A, Wavelength=254 nm

| Peak # | RetTime [min] | Type | Width [min] | Area mAU   | Height *s [mAU] | Area %  |
|--------|---------------|------|-------------|------------|-----------------|---------|
| 1      | 21.609        | BB   | 0.6230      | 3910.40552 | 94.11921        | 50.3693 |
| 2      | 28.346        | BB   | 0.6843      | 3853.05908 | 87.46463        | 49.6307 |

Totals : 7763.46460 181.58384

=====  
 \*\*\* End of Report \*\*\*

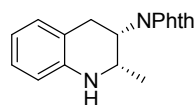

*cis*-(±)-**3b**

Data File C:\FC-4 PD\YZM005185.D  
 Sample Name: FC-6-21A

=====  
 Acq. Operator : ZHOU  
 Acq. Instrument : Instrument 1 Location : Vial 1  
 Injection Date : 11/6/2013 9:02:50 AM  
 Acq. Method : C:\HPCHEM\1\METHODS\DEMOCAL2.M  
 Last changed : 11/6/2013 7:52:30 AM by ZHOU  
 (modified after loading)  
 Analysis Method : C:\CHEM32\1\METHODS\DEF.LC.M  
 Last changed : 3/19/2014 1:45:03 PM by Z  
 (modified after loading)  
 Sample Info : OD-H, H/i-PrOH = 70/30, 0.7 mL/min, 30 oC, 254 nm

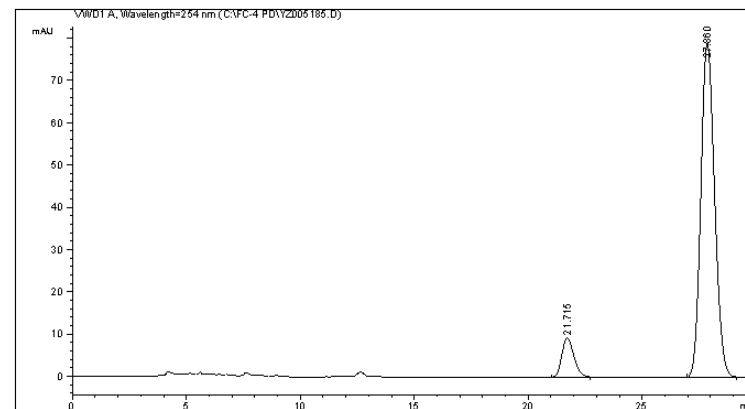

=====  
 Area Percent Report  
 =====

Sorted By : Signal  
 Multiplier: : 1.0000  
 Dilution: : 1.0000  
 Use Multiplier & Dilution Factor with ISTDs

Signal 1: VWD1 A, Wavelength=254 nm

| Peak # | RetTime [min] | Type | Width [min] | Area mAU   | Height *s [mAU] | Area %  |
|--------|---------------|------|-------------|------------|-----------------|---------|
| 1      | 21.715        | BB   | 0.5722      | 346.06189  | 9.30622         | 9.4320  |
| 2      | 27.860        | BB   | 0.6514      | 3322.97461 | 79.15966        | 90.5680 |

Totals : 3669.03650 88.46588

=====  
 \*\*\* End of Report \*\*\*

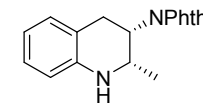

*cis*-(-)-**3b**

Data File C:\FC-2\YZ004506.D  
 Sample Name: FC-5-4B

```

=====
Acq. Operator   : WH
Acq. Instrument : Instrument 1           Location : Vial 1
Injection Date  : 6/5/2013 1:31:59 AM
Acq. Method     : C:\HPCHEM\1\METHODS\DEF.LC.M
Last changed    : 6/5/2013 1:14:42 AM by WH
                 (modified after loading)
Analysis Method : C:\CHEM32\1\METHODS\DEF.LC.M
Last changed    : 10/9/2013 10:16:54 PM by B
                 (modified after loading)
Sample Info     : OD-H, H/i-PrOH = 70/30, 0.7 mL/min, 30 oC, 254 nm
  
```

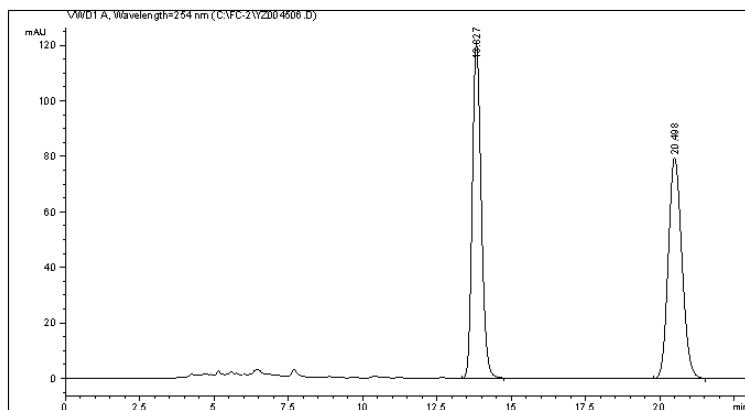

Area Percent Report

```

Sorted By      : Signal
Multiplier:    : 1.0000
Dilution:      : 1.0000
Use Multiplier & Dilution Factor with ISTDs
  
```

Signal 1: VWD1 A, Wavelength=254 nm

| Peak # | RetTime [min] | Type | Width [min] | Area mAU*s | Height [mAU] | Area %  |
|--------|---------------|------|-------------|------------|--------------|---------|
| 1      | 13.827        | BB   | 0.3250      | 2529.78125 | 120.51426    | 50.0247 |
| 2      | 20.498        | BB   | 0.4955      | 2527.28491 | 79.63683     | 49.9753 |

Totals : 5057.06616 200.15109

\*\*\* End of Report \*\*\*

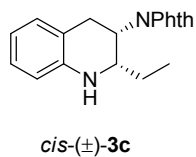

Data File C:\FC-4 PD\YZ005277.D  
 Sample Name: FC-6-21H

```

=====
Acq. Operator   : ZHOU
Acq. Instrument : Instrument 1           Location : Vial 1
Injection Date   : 11/16/2013 12:43:13 PM
Acq. Method     : C:\HPCHEM\1\METHODS\DEHOCAL2.M
Last changed    : 11/16/2013 11:40:55 AM by ZHOU
                 (modified after loading)
Analysis Method : C:\CHEM32\1\METHODS\DEF.LC.M
Last changed    : 3/19/2014 2:03:59 PM by Z
                 (modified after loading)
Sample Info     : OD-H, H/i-PrOH = 70/30, 0.70 mL/min, 30 oC, 254nm
  
```

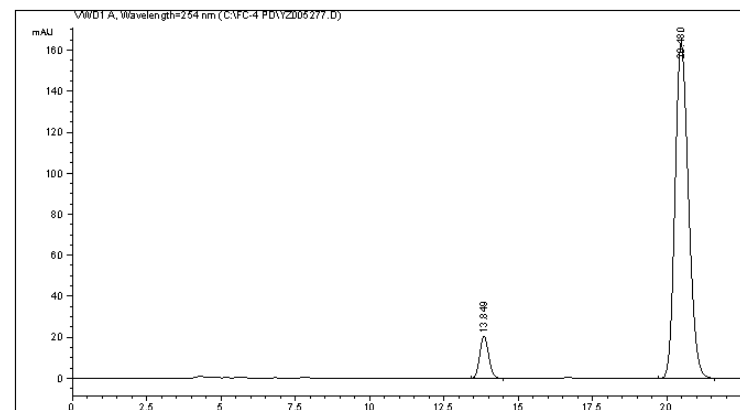

Area Percent Report

```

Sorted By      : Signal
Multiplier:    : 1.0000
Dilution:      : 1.0000
Use Multiplier & Dilution Factor with ISTDs
  
```

Signal 1: VWD1 A, Wavelength=254 nm

| Peak # | RetTime [min] | Type | Width [min] | Area mAU*s | Height [mAU] | Area %  |
|--------|---------------|------|-------------|------------|--------------|---------|
| 1      | 13.849        | BB   | 0.3228      | 431.96985  | 20.75943     | 7.7395  |
| 2      | 20.480        | BB   | 0.4888      | 5149.38428 | 163.28098    | 92.2605 |

Totals : 5581.35413 184.04040

\*\*\* End of Report \*\*\*

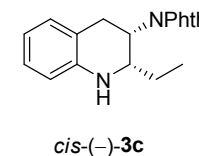

Data File C:\FC-2\YZN002973.D  
 Sample Name: FC-5-15E

=====  
 Acq. Operator : WH  
 Acq. Instrument : Instrument 1 Location : Vial 1  
 Injection Date : 6/11/2013 9:32:17 PM  
 Acq. Method : C:\CHEM32\1\METHODS\DEF.LC.M  
 Last changed : 6/11/2013 9:31:54 PM by WH  
 (modified after loading)  
 Analysis Method : C:\CHEM32\1\METHODS\DEF.LC.M  
 Last changed : 10/9/2013 10:19:15 PM by B  
 (modified after loading)  
 Sample Info : OD-H, H/i-PrOH = 70/30, 0.7 mL/min, 30 oC, 254nm

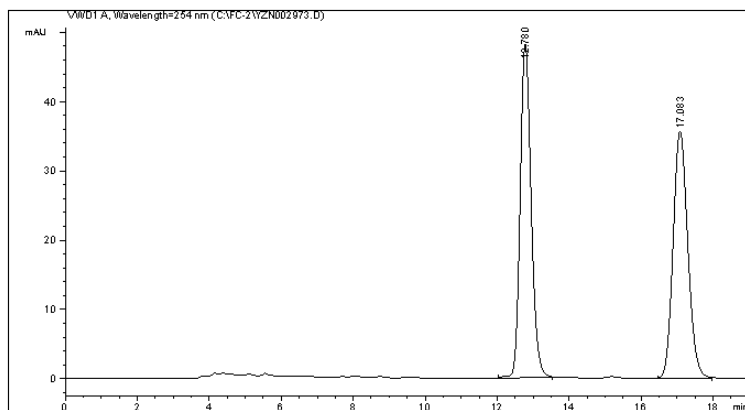

=====  
 Area Percent Report  
 =====

Sorted By : Signal  
 Multiplier: : 1.0000  
 Dilution: : 1.0000  
 Use Multiplier & Dilution Factor with ISTDs

Signal 1: VWD1 A, Wavelength=254 nm

| Peak # | RetTime [min] | Type | Width [min] | Area [mAU*s] | Height [mAU] | Area %  |
|--------|---------------|------|-------------|--------------|--------------|---------|
| 1      | 12.780        | BB   | 0.3250      | 1017.71002   | 48.18303     | 50.2071 |
| 2      | 17.083        | BB   | 0.4396      | 1009.31415   | 35.64315     | 49.7929 |

Totals : 2027.02417 83.82618

=====  
 \*\*\* End of Report \*\*\*

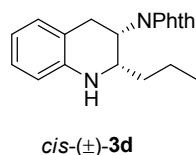

Data File C:\FC-4 PD\YZ005276.D  
 Sample Name: FC-6-21G

=====  
 Acq. Operator : ZHOU  
 Acq. Instrument : Instrument 1 Location : Vial 1  
 Injection Date : 11/16/2013 12:21:34 PM  
 Acq. Method : C:\HPCHEM\1\METHODS\DEHOCAL2.H  
 Last changed : 11/16/2013 11:40:55 AM by ZHOU  
 (modified after loading)  
 Analysis Method : C:\CHEM32\1\METHODS\DEF.LC.M  
 Last changed : 3/19/2014 1:56:09 PM by Z  
 (modified after loading)  
 Sample Info : OD-H, H/i-PrOH = 70/30, 0.70 mL/min, 30 oC, 254nm

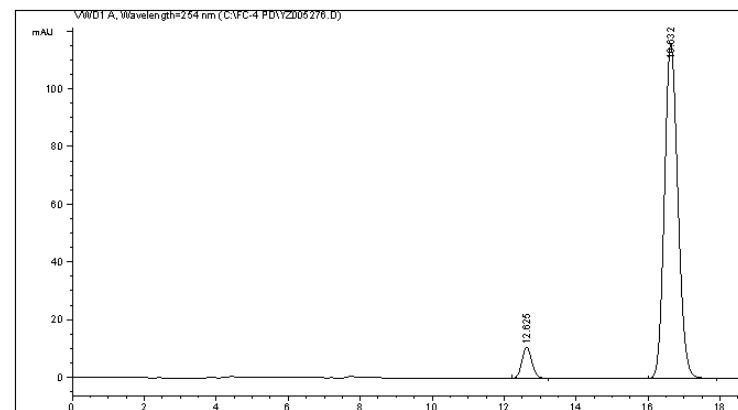

=====  
 Area Percent Report  
 =====

Sorted By : Signal  
 Multiplier: : 1.0000  
 Dilution: : 1.0000  
 Use Multiplier & Dilution Factor with ISTDs

Signal 1: VWD1 A, Wavelength=254 nm

| Peak # | RetTime [min] | Type | Width [min] | Area [mAU*s] | Height [mAU] | Area %  |
|--------|---------------|------|-------------|--------------|--------------|---------|
| 1      | 12.625        | BB   | 0.2964      | 206.74997    | 10.78981     | 6.4153  |
| 2      | 16.632        | BB   | 0.4054      | 3015.99756   | 115.94248    | 93.5847 |

Totals : 3222.74753 126.73229

=====  
 \*\*\* End of Report \*\*\*

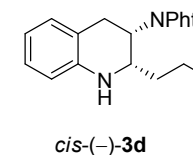

Data File C:\FC-4 PD\YZ004509.D  
 Sample Name: FC-5-4D

=====  
 Acq. Operator : WH  
 Acq. Instrument : Instrument 1 Location : Vial 1  
 Injection Date : 6/5/2013 2:18:54 AM  
 Acq. Method : C:\HPCHEM\1\METHODS\DEF.LC.M  
 Last changed : 6/5/2013 11:14:42 AM by WH  
 (modified after loading)  
 Analysis Method : C:\CHEM32\1\METHODS\DEF.LC.M  
 Last changed : 3/19/2014 2:24:22 PM by Z  
 (modified after loading)  
 Sample Info : OD-H, H/i-PrOH = 70/30, 0.7 mL/min, 30 oC, 254 nm

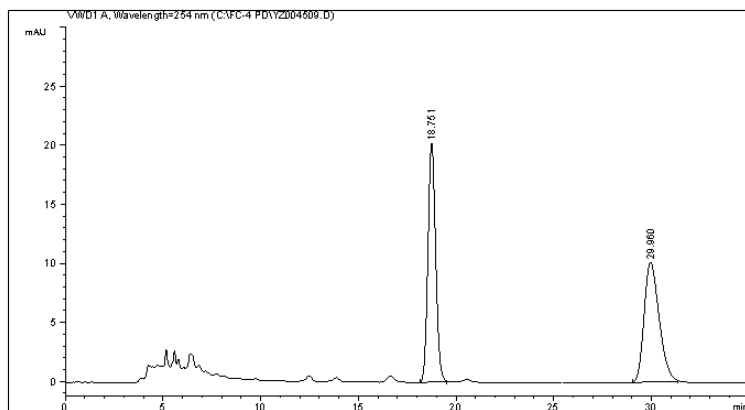

=====  
 Area Percent Report  
 =====

Sorted By : Signal  
 Multiplier: : 1.0000  
 Dilution: : 1.0000  
 Use Multiplier & Dilution Factor with ISTDs

Signal 1: VWD1 A, Wavelength=254 nm

| Peak # | RetTime [min] | Type | Width [min] | Area mAU  | Area %   | Height [mAU] | Area %  |
|--------|---------------|------|-------------|-----------|----------|--------------|---------|
| 1      | 18.751        | BB   | 0.4242      | 553.47186 | 20.21572 | 50.5895      | 50.5895 |
| 2      | 29.960        | BB   | 0.8173      | 540.57367 | 10.11172 | 49.4105      | 49.4105 |

Totals : 1094.04553 30.32744

=====  
 \*\*\* End of Report \*\*\*

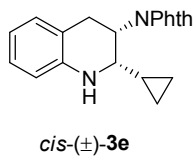

Data File C:\FC-4 PD\YZ005280.D  
 Sample Name: FC-6-25G

=====  
 Acq. Operator : ZHOU  
 Acq. Instrument : Instrument 1 Location : Vial 1  
 Injection Date : 11/16/2013 2:13:53 PM  
 Acq. Method : C:\HPCHEM\1\METHODS\DEMOCAL2.M  
 Last changed : 11/16/2013 2:33:12 PM by ZHOU  
 (modified after loading)  
 Analysis Method : C:\CHEM32\1\METHODS\DEF.LC.M  
 Last changed : 3/19/2014 2:25:16 PM by Z  
 (modified after loading)  
 Sample Info : OD-H, H/i-PrOH = 70/30, 0.70 mL/min, 30 oC, 254nm

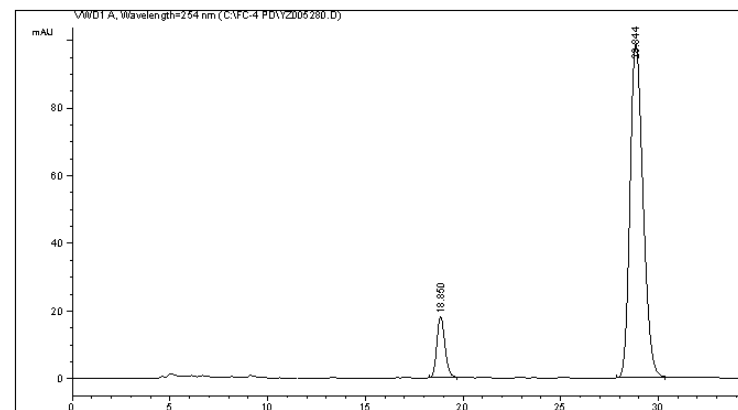

=====  
 Area Percent Report  
 =====

Sorted By : Signal  
 Multiplier: : 1.0000  
 Dilution: : 1.0000  
 Use Multiplier & Dilution Factor with ISTDs

Signal 1: VWD1 A, Wavelength=254 nm

| Peak # | RetTime [min] | Type | Width [min] | Area mAU   | Area %   | Height [mAU] | Area %  |
|--------|---------------|------|-------------|------------|----------|--------------|---------|
| 1      | 18.850        | BB   | 0.4476      | 521.99036  | 18.07144 | 10.2492      | 10.2492 |
| 2      | 28.844        | BB   | 0.7169      | 4570.97607 | 98.61848 | 89.7508      | 89.7508 |

Totals : 5092.96643 116.68992

=====  
 \*\*\* End of Report \*\*\*

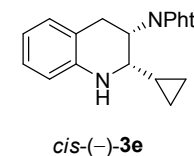

Data File C:\FC-2\YZN002996.D  
Sample Name: FC-5-15H

=====  
Acq. Operator : WH  
Acq. Instrument : Instrument 1 Location : Vial 1  
Injection Date : 6/14/2013 4:15:31 PM  
Acq. Method : C:\CHEM32\1\METHODS\DEF.LC.M  
Last changed : 6/14/2013 4:13:10 PM by WH  
(modified after loading)  
Analysis Method : C:\CHEM32\1\METHODS\DEF.LC.M  
Last changed : 10/9/2013 10:19:15 PM by B  
(modified after loading)  
Sample Info : OD-H, H/i-PrOH = 70/30, 0.7 mL/min, 30 oC, 254 nm

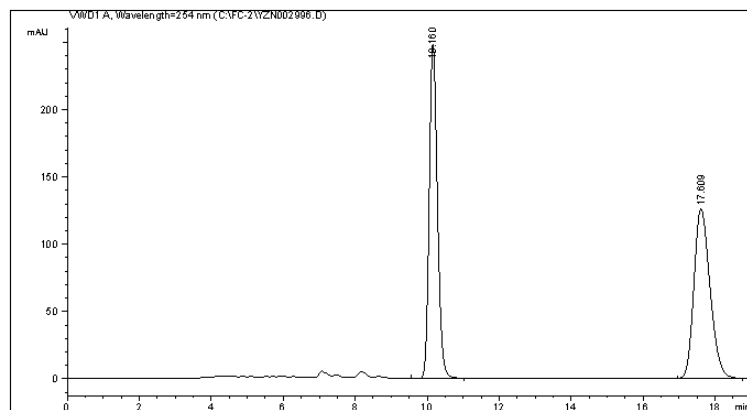

=====  
Area Percent Report  
=====

Sorted By : Signal  
Multiplier: : 1.0000  
Dilution: : 1.0000  
Use Multiplier & Dilution Factor with ISTDs

Signal 1: VWD1 A, Wavelength=254 nm

| Peak # | RetTime [min] | Type | Width [min] | Area mAU   | Height *s [mAU] | Area %  |
|--------|---------------|------|-------------|------------|-----------------|---------|
| 1      | 10.160        | EB   | 0.2457      | 3930.91138 | 248.50368       | 50.1263 |
| 2      | 17.609        | EB   | 0.4798      | 3911.09814 | 126.08517       | 49.8737 |

Totals : 7842.00952 374.58884

=====  
\*\*\* End of Report \*\*\*

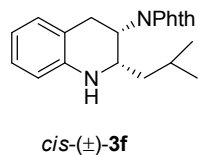

Data File C:\FC-4 PD\YZ005278.D  
Sample Name: FC-6-25F

=====  
Acq. Operator : ZHOU  
Acq. Instrument : Instrument 1 Location : Vial 1  
Injection Date : 11/16/2013 1:12:40 PM  
Acq. Method : C:\HPCHEM\1\METHODS\DEHOCAL2.M  
Last changed : 11/16/2013 11:40:55 AM by ZHOU  
(modified after loading)  
Analysis Method : C:\CHEM32\1\METHODS\DEF.LC.M  
Last changed : 3/19/2014 2:13:30 PM by Z  
(modified after loading)  
Sample Info : OD-H, H/i-PrOH = 70/30, 0.70 mL/min, 30 oC, 254nm

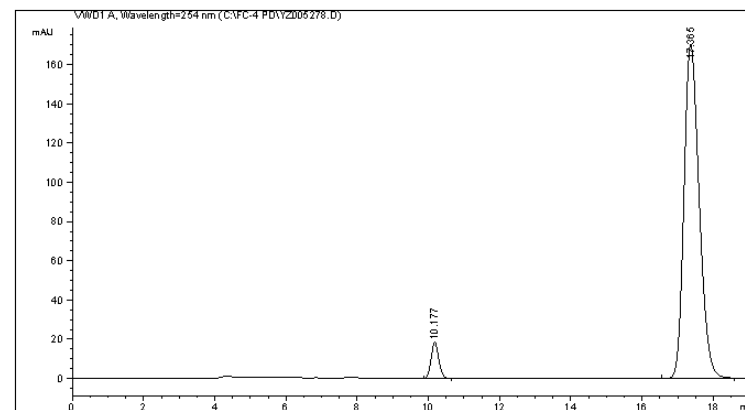

=====  
Area Percent Report  
=====

Sorted By : Signal  
Multiplier: : 1.0000  
Dilution: : 1.0000  
Use Multiplier & Dilution Factor with ISTDs

Signal 1: VWD1 A, Wavelength=254 nm

| Peak # | RetTime [min] | Type | Width [min] | Area mAU   | Height *s [mAU] | Area %  |
|--------|---------------|------|-------------|------------|-----------------|---------|
| 1      | 10.177        | EB   | 0.2342      | 279.06879  | 18.50447        | 5.2374  |
| 2      | 17.365        | EB   | 0.4575      | 5049.33252 | 170.54918       | 94.7626 |

Totals : 5328.40131 189.05365

=====  
\*\*\* End of Report \*\*\*

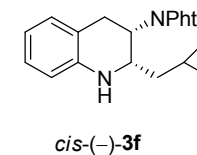



Data File C:\FC-2\YZ\N003132.D  
 Sample Name: FC-5-31F

=====  
 Acq. Operator : YZ  
 Acq. Instrument : Instrument 1 Location : Vial 1  
 Injection Date : 7/1/2013 10:55:21 AM  
 Acq. Method : C:\CHEM32\1\METHODS\DEF.LC.M  
 Last changed : 7/1/2013 10:30:28 AM by YZ  
 (modified after loading)  
 Analysis Method : C:\CHEM32\1\METHODS\DEF.LC.M  
 Last changed : 10/9/2013 10:22:50 PM by B  
 (modified after loading)  
 Sample Info : OD-H, H/i-PrOH = 70/30, 0.6 mL/min, 30 oC, 254nm

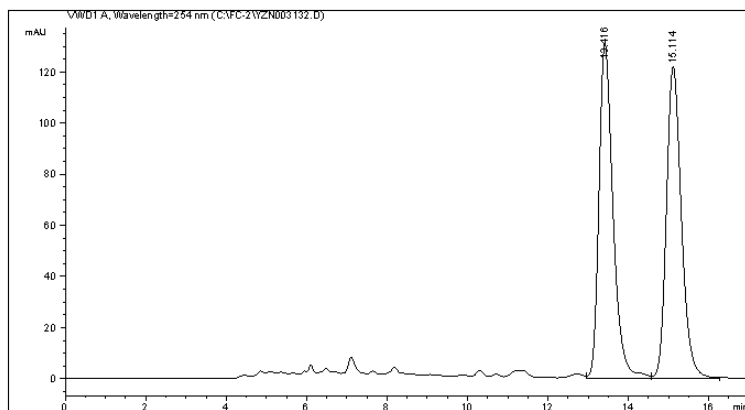

=====  
 Area Percent Report  
 =====

Sorted By : Signal  
 Multiplier: : 1.0000  
 Dilution: : 1.0000  
 Use Multiplier & Dilution Factor with ISTDs

Signal 1: VWD1 A, Wavelength=254 nm

| Peak # | RetTime [min] | Type | Width [min] | Area mAU   | Area %  | Height [mAU] | Area %  |
|--------|---------------|------|-------------|------------|---------|--------------|---------|
| 1      | 13.416        | VV   | 0.3705      | 3171.39990 | 50.3245 | 130.66174    | 50.3245 |
| 2      | 15.114        | VB   | 0.3943      | 3130.49976 | 49.6755 | 121.86823    | 49.6755 |

Totals : 6301.89966 252.52998

=====  
 \*\*\* End of Report \*\*\*

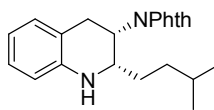

*cis-(±)-3g*

Data File C:\FC-4 PD\YZ005228.D  
 Sample Name: FC-6-25E

=====  
 Acq. Operator : ZHOU  
 Acq. Instrument : Instrument 1 Location : Vial 1  
 Injection Date : 11/11/2013 1:07:27 PM  
 Acq. Method : C:\HPCHEM\1\METHODS\DEMOCAL2.M  
 Last changed : 11/11/2013 1:01:42 PM by ZHOU  
 (modified after loading)  
 Analysis Method : C:\CHEM32\1\METHODS\DEF.LC.M  
 Last changed : 3/19/2014 2:21:21 PM by Z  
 (modified after loading)  
 Sample Info : OD-H, H/i-PrOH = 70/30, 0.60 mL/min, 30 oC, 254 nm

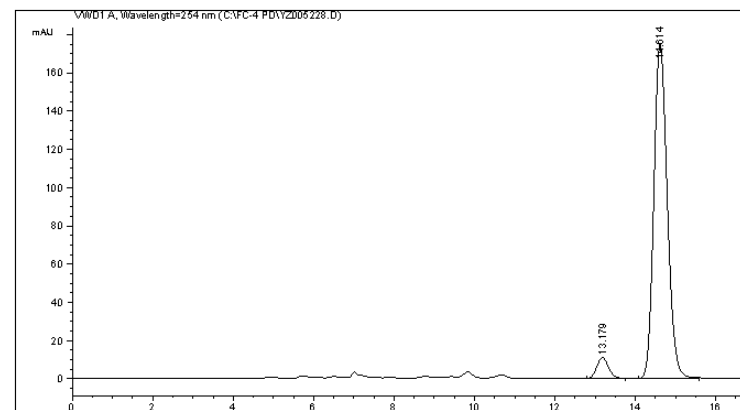

=====  
 Area Percent Report  
 =====

Sorted By : Signal  
 Multiplier: : 1.0000  
 Dilution: : 1.0000  
 Use Multiplier & Dilution Factor with ISTDs

Signal 1: VWD1 A, Wavelength=254 nm

| Peak # | RetTime [min] | Type | Width [min] | Area mAU   | Area %  | Height [mAU] | Area %  |
|--------|---------------|------|-------------|------------|---------|--------------|---------|
| 1      | 13.179        | EB   | 0.3171      | 220.64961  | 5.1799  | 10.86086     | 5.1799  |
| 2      | 14.614        | EB   | 0.3570      | 4039.04907 | 94.8201 | 174.78802    | 94.8201 |

Totals : 4259.69868 185.64889

=====  
 \*\*\* End of Report \*\*\*

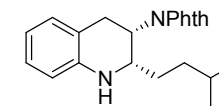

*cis-(-)-3g*

Data File C:\FC-2\YZN003128.D  
Sample Name: FC-5-31A

=====  
Acq. Operator : YZ  
Acq. Instrument : Instrument 1 Location : Vial 1  
Injection Date : 6/30/2013 5:59:30 PM  
Acq. Method : C:\CHEM32\1\METHODS\DEF.LC.M  
Last changed : 6/30/2013 5:57:42 PM by YZ  
(modified after loading)  
Analysis Method : C:\CHEM32\1\METHODS\DEF.LC.M  
Last changed : 10/9/2013 10:24:50 PM by B  
(modified after loading)  
Sample Info : OD-H, H/i-PrOH = 70/30, 0.7 mL/min, 30 oC, 254nm

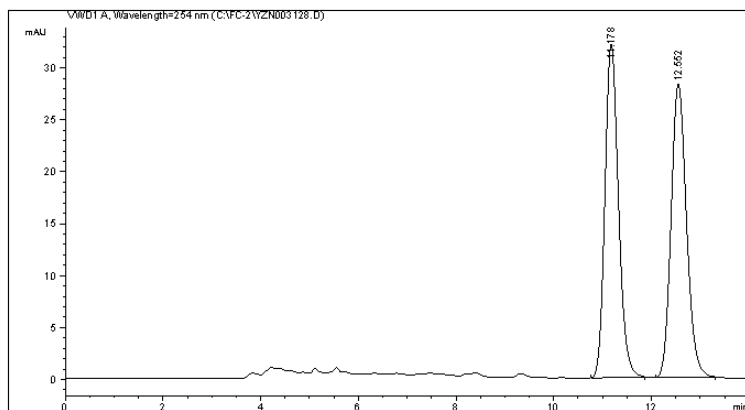

=====  
Area Percent Report  
=====

Sorted By : Signal  
Multiplier: : 1.0000  
Dilution: : 1.0000  
Use Multiplier & Dilution Factor with ISTDs

Signal 1: VWD1 A, Wavelength=254 nm

| Peak # | RetTime [min] | Type | Width [min] | Area [mAU*s] | Height [mAU] | Area %  |
|--------|---------------|------|-------------|--------------|--------------|---------|
| 1      | 11.178        | EB   | 0.2976      | 619.77832    | 32.16206     | 49.9698 |
| 2      | 12.552        | EB   | 0.3391      | 620.52863    | 28.26396     | 50.0302 |

Totals : 1240.30695 60.42602

=====  
\*\*\* End of Report \*\*\*

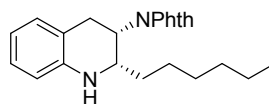

*cis*-(±)-3h

Data File C:\FC-4 PD\YZ005219.D  
Sample Name: FC-6-21C

=====  
Acq. Operator : ZHOU  
Acq. Instrument : Instrument 1 Location : Vial 1  
Injection Date : 11/10/2013 3:17:46 AM  
Acq. Method : C:\HPCHEM\1\METHODS\DEMOCAL2.M  
Last changed : 11/10/2013 1:08:06 AM by ZHOU  
(modified after loading)  
Analysis Method : C:\CHEM32\1\METHODS\DEF.LC.M  
Last changed : 3/20/2014 6:50:36 PM by Z  
(modified after loading)  
Sample Info : OD-H, H/i-PrOH = 70/30, 0.70 mL/min, 30 oC, 254 nm

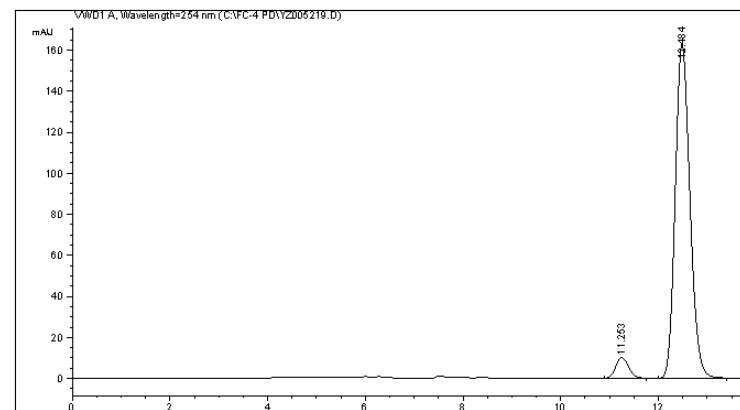

=====  
Area Percent Report  
=====

Sorted By : Signal  
Multiplier: : 1.0000  
Dilution: : 1.0000  
Use Multiplier & Dilution Factor with ISTDs

Signal 1: VWD1 A, Wavelength=254 nm

| Peak # | RetTime [min] | Type | Width [min] | Area [mAU*s] | Height [mAU] | Area %  |
|--------|---------------|------|-------------|--------------|--------------|---------|
| 1      | 11.253        | EB   | 0.2882      | 189.07195    | 10.17013     | 5.2442  |
| 2      | 12.484        | EB   | 0.3261      | 3416.27197   | 162.98039    | 94.7558 |

Totals : 3605.34392 173.15053

=====  
\*\*\* End of Report \*\*\*

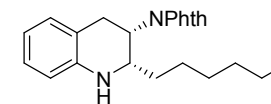

*cis*-(-)-3h

Data File C:\FC-2\YZN003130.D  
Sample Name: FC-5-31D

=====  
Acq. Operator : YZ  
Acq. Instrument : Instrument 1 Location : Vial 1  
Injection Date : 7/1/2013 8:32:52 AM  
Acq. Method : C:\CHEM32\1\METHODS\DEF.LC.M  
Last changed : 7/1/2013 8:32:15 AM by YZ  
(modified after loading)  
Analysis Method : C:\CHEM32\1\METHODS\DEF.LC.M  
Last changed : 10/9/2013 10:26:48 PM by B  
(modified after loading)  
Sample Info : OD-H, H/i-PrOH = 70/30, 0.7 mL/min, 30 oC, 254nm

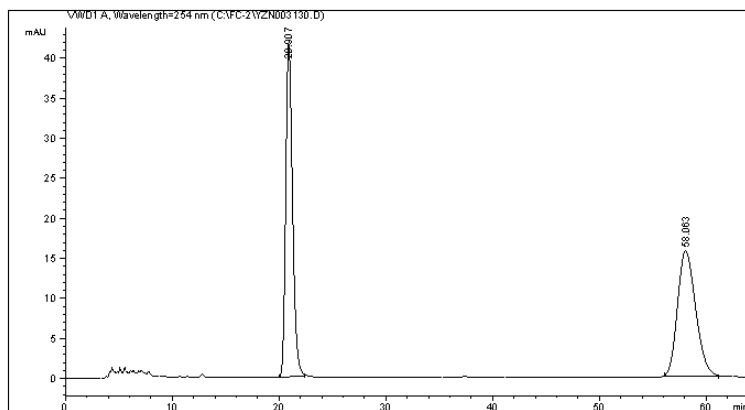

=====  
Area Percent Report  
=====

Sorted By : Signal  
Multiplier: : 1.0000  
Dilution: : 1.0000  
Use Multiplier & Dilution Factor with ISTDs

Signal 1: VWD1 A, Wavelength=254 nm

| Peak # | RetTime [min] | Type | Width [min] | Area mAU*s | Height [mAU] | Area %  |
|--------|---------------|------|-------------|------------|--------------|---------|
| 1      | 20.907        | BB   | 0.6820      | 1851.19116 | 41.61592     | 50.2063 |
| 2      | 58.063        | BB   | 1.6967      | 1835.97693 | 15.66210     | 49.7937 |

Totals : 3687.16809 57.27802

=====  
\*\*\* End of Report \*\*\*

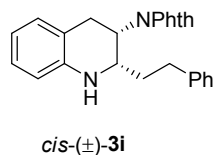

Data File C:\FC-4 PDVZ005221.D  
Sample Name: FC-6-21I

=====  
Acq. Operator : ZHOU  
Acq. Instrument : Instrument 1 Location : Vial 1  
Injection Date : 11/10/2013 7:28:50 AM  
Acq. Method : C:\HPCHEM\1\METHODS\DEMOCAL2.M  
Last changed : 11/10/2013 7:51:31 AM by ZHOU  
(modified after loading)  
Analysis Method : C:\CHEM32\1\METHODS\DEF.LC.M  
Last changed : 3/19/2014 2:11:40 PM by Z  
(modified after loading)  
Sample Info : OD-H, H/i-PrOH = 70/30, 0.70 mL/min, 30 oC, 254 nm

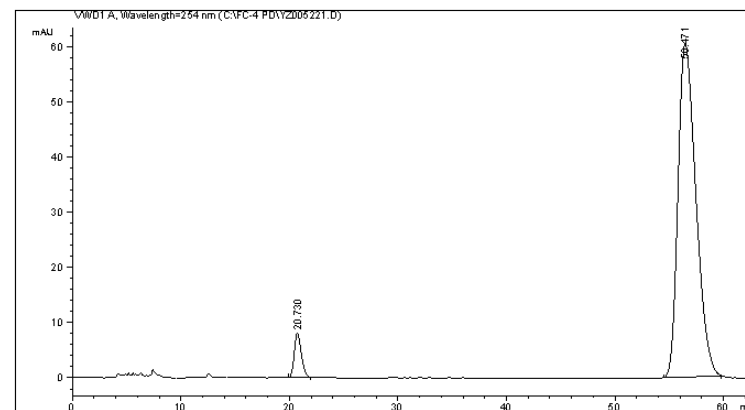

=====  
Area Percent Report  
=====

Sorted By : Signal  
Multiplier: : 1.0000  
Dilution: : 1.0000  
Use Multiplier & Dilution Factor with ISTDs

Signal 1: VWD1 A, Wavelength=254 nm

| Peak # | RetTime [min] | Type | Width [min] | Area mAU*s | Height [mAU] | Area %  |
|--------|---------------|------|-------------|------------|--------------|---------|
| 1      | 20.730        | BB   | 0.6737      | 359.73199  | 8.03634      | 4.9467  |
| 2      | 56.471        | BB   | 1.7246      | 6912.45605 | 60.37128     | 95.0533 |

Totals : 7272.18805 68.40762

=====  
\*\*\* End of Report \*\*\*

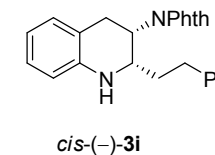

Data File C:\FC-4 PD\YZ005351.D  
 Sample Name: FC-6-44B

=====  
 Acq. Operator : ZHOU  
 Acq. Instrument : Instrument 1 Location : Vial 1  
 Injection Date : 12/7/2013 11:33:21 AM  
 Acq. Method : C:\HPCHEM\1\METHODS\DEMOCAL2.M  
 Last changed : 12/7/2013 10:49:03 AM by ZHOU  
 (modified after loading)  
 Analysis Method : C:\CHEM32\1\METHODS\DEF.LC.M  
 Last changed : 3/19/2014 2:47:56 PM by Z  
 (modified after loading)  
 Sample Info : OD-H, H/i-PrOH = 70/30, 0.7 mL/min, 30 oC, 254 nm

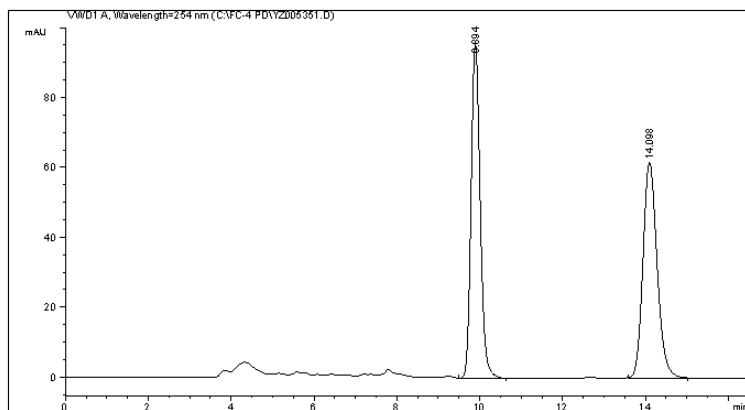

=====  
 Area Percent Report  
 =====

Sorted By : Signal  
 Multiplier: : 1.0000  
 Dilution: : 1.0000  
 Use Multiplier & Dilution Factor with ISTDs

Signal 1: VWD1 A, Wavelength=254 nm

| Peak # | RetTime [min] | Type | Width [min] | Area mAU   | Height *s [mAU] | Area %  |
|--------|---------------|------|-------------|------------|-----------------|---------|
| 1      | 9.894         | VB   | 0.2362      | 1460.19324 | 95.72971        | 49.9780 |
| 2      | 14.098        | EB   | 0.3666      | 1461.47852 | 61.70567        | 50.0220 |

Totals : 2921.67175 157.43539

=====  
 \*\*\* End of Report \*\*\*

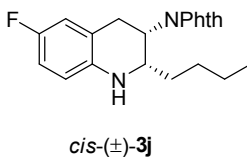

Data File C:\FC-4 PD\YZ005354.D  
 Sample Name: FC-6-44A

=====  
 Acq. Operator : ZHOU  
 Acq. Instrument : Instrument 1 Location : Vial 1  
 Injection Date : 12/7/2013 12:41:56 PM  
 Acq. Method : C:\HPCHEM\1\METHODS\DEMOCAL2.M  
 Last changed : 12/7/2013 10:49:03 AM by ZHOU  
 (modified after loading)  
 Analysis Method : C:\CHEM32\1\METHODS\DEF.LC.M  
 Last changed : 3/19/2014 2:47:56 PM by Z  
 (modified after loading)  
 Sample Info : OD-H, H/i-PrOH = 70/30, 0.7 mL/min, 30 oC, 254 nm

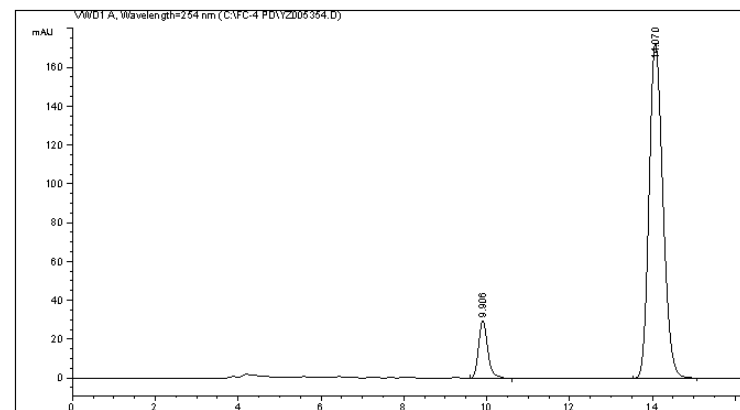

=====  
 Area Percent Report  
 =====

Sorted By : Signal  
 Multiplier: : 1.0000  
 Dilution: : 1.0000  
 Use Multiplier & Dilution Factor with ISTDs

Signal 1: VWD1 A, Wavelength=254 nm

| Peak # | RetTime [min] | Type | Width [min] | Area mAU   | Height *s [mAU] | Area %  |
|--------|---------------|------|-------------|------------|-----------------|---------|
| 1      | 9.906         | EB   | 0.2387      | 464.39185  | 29.78394        | 10.3754 |
| 2      | 14.070        | EB   | 0.3604      | 4011.52148 | 172.33759       | 89.6246 |

Totals : 4475.91333 202.12153

=====  
 \*\*\* End of Report \*\*\*

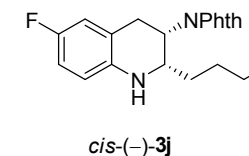

Data File C:\FC-2\YZN002989.D  
 Sample Name: FC-5-SF

=====  
 Acq. Operator : WH  
 Acq. Instrument : Instrument 1 Location : Vial 1  
 Injection Date : 6/13/2013 6:02:46 PM  
 Acq. Method : C:\CHEM32\1\METHODS\DEF.LC.M  
 Last changed : 6/13/2013 5:57:07 PM by WH  
 (modified after loading)  
 Analysis Method : C:\CHEM32\1\METHODS\DEF.LC.M  
 Last changed : 10/9/2013 10:30:44 PM by B  
 (modified after loading)  
 Sample Info : OD-H, H/i-PrOH = 70/30, 0.7 mL/min, 30 oC, 254 nm

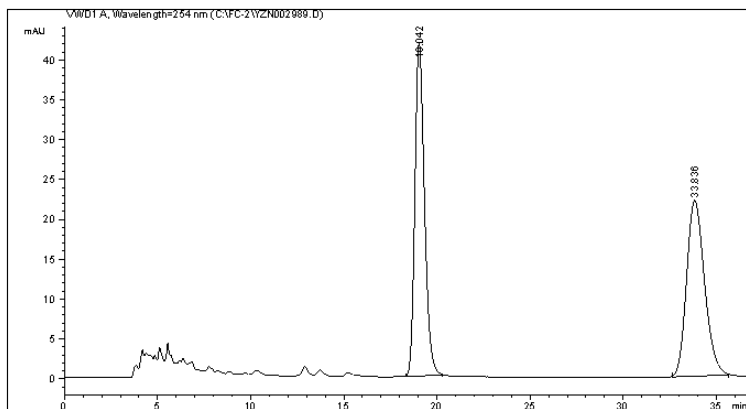

=====  
 Area Percent Report  
 =====

Sorted By : Signal  
 Multiplier: : 1.0000  
 Dilution: : 1.0000  
 Use Multiplier & Dilution Factor with ISTDs

Signal 1: VWD1 A, Wavelength=254 nm

| Peak # | RetTime [min] | Type | Width [min] | Area [mAU*s] | Height [mAU] | Area %  |
|--------|---------------|------|-------------|--------------|--------------|---------|
| 1      | 19.042        | BB   | 0.5526      | 1498.45117   | 41.75992     | 50.4122 |
| 2      | 33.836        | BB   | 1.0161      | 1473.94409   | 22.03925     | 49.5878 |

Totals : 2972.39526 63.79917

=====  
 \*\*\* End of Report \*\*\*

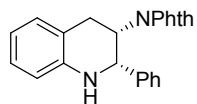

*cis*-(±)-3k

Data File C:\FC-4 PD\YZ005330.D  
 Sample Name: FC-6-2LD

=====  
 Acq. Operator : ZHOU  
 Acq. Instrument : Instrument 1 Location : Vial 1  
 Injection Date : 11/26/2013 2:04:16 AM  
 Acq. Method : C:\HPCHEM\1\METHODS\DEMOCAL2.M  
 Last changed : 11/26/2013 1:01:57 AM by ZHOU  
 (modified after loading)  
 Analysis Method : C:\CHEM32\1\METHODS\DEF.LC.M  
 Last changed : 3/19/2014 2:09:40 PM by Z  
 (modified after loading)  
 Sample Info : OD-H, H/i-PrOH = 70/30, 0.7 mL/min, 30 oC, 254 nm

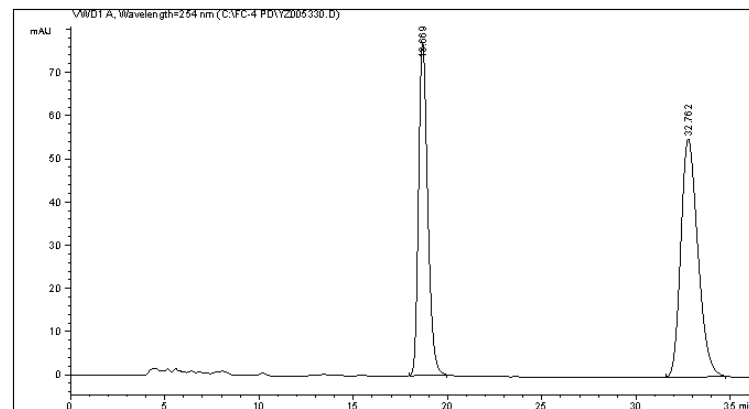

=====  
 Area Percent Report  
 =====

Sorted By : Signal  
 Multiplier: : 1.0000  
 Dilution: : 1.0000  
 Use Multiplier & Dilution Factor with ISTDs

Signal 1: VWD1 A, Wavelength=254 nm

| Peak # | RetTime [min] | Type | Width [min] | Area [mAU*s] | Height [mAU] | Area %  |
|--------|---------------|------|-------------|--------------|--------------|---------|
| 1      | 18.669        | BB   | 0.5209      | 2613.06055   | 77.03931     | 43.0004 |
| 2      | 32.762        | BB   | 0.9669      | 3463.76855   | 55.16659     | 56.9996 |

Totals : 6076.82910 132.20589

=====  
 \*\*\* End of Report \*\*\*

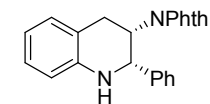

*cis*(-)-3k

Data File C:\FC-2\YZN003130.D  
 Sample Name: FC-5-31D

=====  
 Acq. Operator : YZ  
 Acq. Instrument : Instrument 1 Location : Vial 1  
 Injection Date : 7/1/2013 8:32:52 AM  
 Acq. Method : C:\CHEM32\1\METHODS\DEF.LC.M  
 Last changed : 7/1/2013 8:32:15 AM by YZ  
 (modified after loading)  
 Analysis Method : C:\CHEM32\1\METHODS\DEF.LC.M  
 Last changed : 10/9/2013 10:26:48 PM by B  
 (modified after loading)  
 Sample Info : OD-H, H/i-PrOH = 70/30, 0.7 mL/min, 30 oC, 254nm



=====  
 Area Percent Report  
 =====

Sorted By : Signal  
 Multiplier: : 1.0000  
 Dilution: : 1.0000  
 Use Multiplier & Dilution Factor with ISTDs

Signal 1: VWD1 A, Wavelength=254 nm

| Peak # | RetTime [min] | Type | Width [min] | Area mAU*s | Height [mAU] | Area %  |
|--------|---------------|------|-------------|------------|--------------|---------|
| 1      | 20.907        | BB   | 0.6820      | 1851.19116 | 41.61592     | 50.2063 |
| 2      | 58.063        | BB   | 1.6967      | 1835.97693 | 15.66210     | 49.7937 |

Totals : 3687.16809 57.27802

=====  
 \*\*\* End of Report \*\*\*

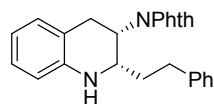

*cis*-(±)-3i

Data File C:\FC-4 PD\YZ005227.D  
 Sample Name: FC-6-25B

=====  
 Acq. Operator : ZHOU  
 Acq. Instrument : Instrument 1 Location : Vial 1  
 Injection Date : 11/11/2013 11:53:30 AM  
 Acq. Method : C:\HPCHEM\1\METHODS\DEHOCAL2.M  
 Last changed : 11/11/2013 12:25:53 PM by ZHOU  
 (modified after loading)  
 Analysis Method : C:\CHEM32\1\METHODS\DEF.LC.M  
 Last changed : 3/19/2014 2:26:54 PM by Z  
 (modified after loading)  
 Sample Info : OD-H, H/i-PrOH = 70/30, 0.70 mL/min, 30 oC, 254 nm

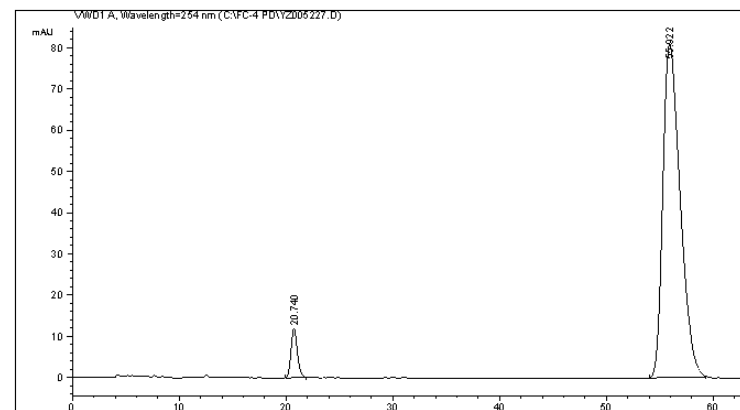

=====  
 Area Percent Report  
 =====

Sorted By : Signal  
 Multiplier: : 1.0000  
 Dilution: : 1.0000  
 Use Multiplier & Dilution Factor with ISTDs

Signal 1: VWD1 A, Wavelength=254 nm

| Peak # | RetTime [min] | Type | Width [min] | Area mAU*s | Height [mAU] | Area %  |
|--------|---------------|------|-------------|------------|--------------|---------|
| 1      | 20.740        | BB   | 0.6388      | 497.12738  | 11.93569     | 5.1738  |
| 2      | 55.922        | BB   | 1.6248      | 9111.40234 | 80.94560     | 94.8262 |

Totals : 9608.52972 92.88129

=====  
 \*\*\* End of Report \*\*\*

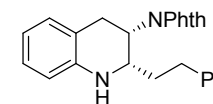

*cis*(-)-3i  
 for the hydrogenation of 2f

Data File C:\FC-4 PD\YZ005287.D  
 Sample Name: FC-6-30E

=====  
 Acq. Operator : ZHOU  
 Acq. Instrument : Instrument 1 Location : Vial 1  
 Injection Date : 11/19/2013 10:39:56 AM  
 Acq. Method : C:\HPCHEM\1\METHODS\DEMOCAL2.M  
 Last changed : 11/19/2013 9:58:47 AM by ZHOU  
 (modified after loading)  
 Analysis Method : C:\CHEM32\1\METHODS\DEF.LC.M  
 Last changed : 3/19/2014 2:29:07 PM by Z  
 (modified after loading)  
 Sample Info : OD-H, H/i-PrOH = 70/30, 0.70 mL/min, 30 oC, 254nm

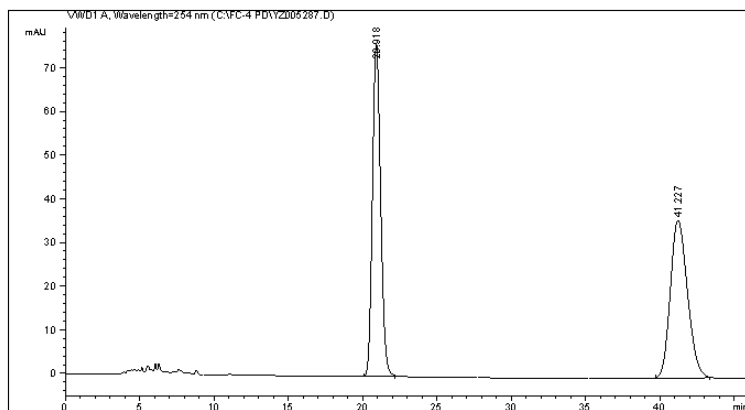

=====  
 Area Percent Report  
 =====

Sorted By : Signal  
 Multiplier: : 1.0000  
 Dilution: : 1.0000  
 Use Multiplier & Dilution Factor with ISTDs

Signal 1: VWD1 A, Wavelength=254 nm

| Peak # | RetTime [min] | Type | Width [min] | Area mAU*s | Height [mAU] | Area %  |
|--------|---------------|------|-------------|------------|--------------|---------|
| 1      | 20.918        | BB   | 0.5925      | 2914.56201 | 76.08921     | 50.0906 |
| 2      | 41.227        | BB   | 1.2247      | 2904.01489 | 36.12630     | 49.9094 |

Totals : 5818.57690 112.21551

=====  
 \*\*\* End of Report \*\*\*

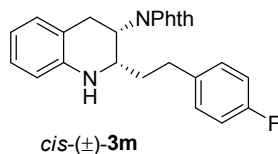

Data File C:\FC-4 PD\YZ005288.D  
 Sample Name: FC-6-30A

=====  
 Acq. Operator : ZHOU  
 Acq. Instrument : Instrument 1 Location : Vial 1  
 Injection Date : 11/19/2013 11:27:03 AM  
 Acq. Method : C:\HPCHEM\1\METHODS\DEMOCAL2.M  
 Last changed : 11/19/2013 9:58:47 AM by ZHOU  
 (modified after loading)  
 Analysis Method : C:\CHEM32\1\METHODS\DEF.LC.M  
 Last changed : 3/19/2014 2:29:07 PM by Z  
 (modified after loading)  
 Sample Info : OD-H, H/i-PrOH = 70/30, 0.70 mL/min, 30 oC, 254nm

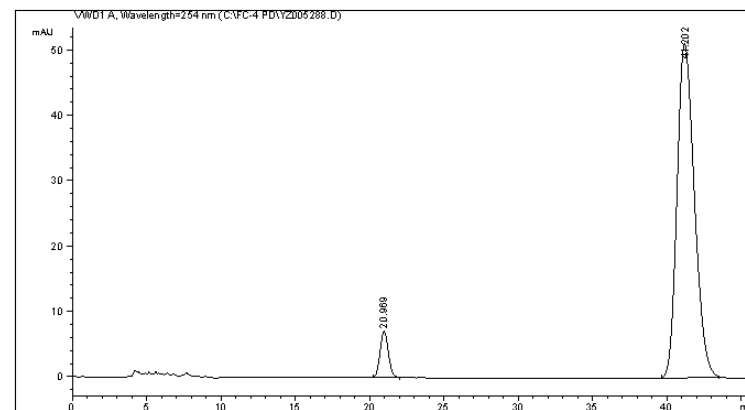

=====  
 Area Percent Report  
 =====

Sorted By : Signal  
 Multiplier: : 1.0000  
 Dilution: : 1.0000  
 Use Multiplier & Dilution Factor with ISTDs

Signal 1: VWD1 A, Wavelength=254 nm

| Peak # | RetTime [min] | Type | Width [min] | Area mAU*s | Height [mAU] | Area %  |
|--------|---------------|------|-------------|------------|--------------|---------|
| 1      | 20.969        | BB   | 0.6110      | 275.91119  | 7.11668      | 6.2358  |
| 2      | 41.202        | BB   | 1.2611      | 4148.72705 | 51.13284     | 93.7642 |

Totals : 4424.63824 58.24952

=====  
 \*\*\* End of Report \*\*\*

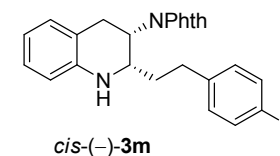

Data File C:\FC-4 PD\YZ005289.D  
 Sample Name: FC-6-30D2

=====  
 Acq. Operator : ZHOU  
 Acq. Instrument : Instrument 1 Location : Vial 1  
 Injection Date : 11/19/2013 12:15:23 PM  
 Acq. Method : C:\HPCHEM\1\METHODS\DEMOCAL2.M  
 Last changed : 11/19/2013 9:58:47 AM by ZHOU  
 (modified after loading)  
 Analysis Method : C:\CHEM32\1\METHODS\DEF.LC.M  
 Last changed : 3/19/2014 2:34:42 PM by Z  
 (modified after loading)  
 Sample Info : OD-H, H/i-PrOH = 70/30, 0.70 mL/min, 30 oC, 254nm

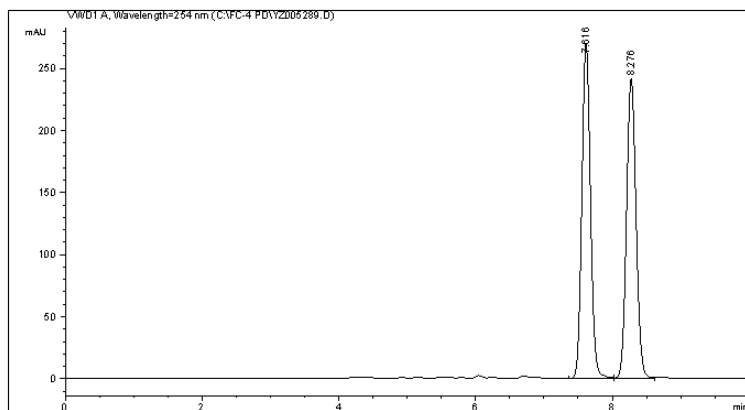

=====  
 Area Percent Report  
 =====

Sorted By : Signal  
 Multiplier: : 1.0000  
 Dilution: : 1.0000  
 Use Multiplier & Dilution Factor with ISTDs

Signal 1: VWD1 A, Wavelength=254 nm

| Peak # | RetTime [min] | Type | Width [min] | Area mAU*s | Height [mAU] | Area %  |
|--------|---------------|------|-------------|------------|--------------|---------|
| 1      | 7.616         | BV   | 0.1360      | 2367.75439 | 269.59491    | 50.2285 |
| 2      | 8.276         | VV   | 0.1512      | 2346.20776 | 241.50424    | 49.7715 |

Totals : 4713.96216 511.09915

=====  
 \*\*\* End of Report \*\*\*

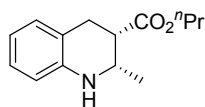

*cis*-(±)-8a

Data File C:\FC-4 PD\YZ005223.D  
 Sample Name: FC-6-25D2

=====  
 Acq. Operator : ZHOU  
 Acq. Instrument : Instrument 1 Location : Vial 1  
 Injection Date : 11/11/2013 10:50:34 AM  
 Acq. Method : C:\HPCHEM\1\METHODS\DEMOCAL2.M  
 Last changed : 11/11/2013 9:56:12 AM by ZHOU  
 (modified after loading)  
 Analysis Method : C:\CHEM32\1\METHODS\DEF.LC.M  
 Last changed : 3/19/2014 2:41:02 PM by Z  
 (modified after loading)  
 Sample Info : OD-H, H/i-PrOH = 70/30, 0.70 mL/min, 30 oC, 254 nm

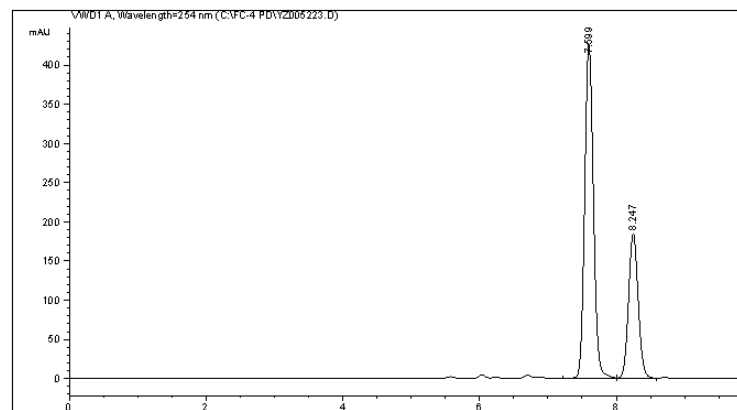

=====  
 Area Percent Report  
 =====

Sorted By : Signal  
 Multiplier: : 1.0000  
 Dilution: : 1.0000  
 Use Multiplier & Dilution Factor with ISTDs

Signal 1: VWD1 A, Wavelength=254 nm

| Peak # | RetTime [min] | Type | Width [min] | Area mAU*s | Height [mAU] | Area %  |
|--------|---------------|------|-------------|------------|--------------|---------|
| 1      | 7.599         | BV   | 0.1391      | 3816.40259 | 427.41977    | 67.5877 |
| 2      | 8.247         | VV   | 0.1529      | 1830.19141 | 185.53156    | 32.4123 |

Totals : 5646.59399 612.95132

=====  
 \*\*\* End of Report \*\*\*

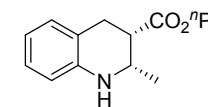

*cis*(-)-8a



Data File C:\FC-4 PD\YZ005291.D  
 Sample Name: FC-6-25D1

```

=====
Acq. Operator   : ZHOU
Acq. Instrument : Instrument 1           Location : Vial 1
Injection Date  : 11/19/2013 12:56:39 PM
Acq. Method     : C:\HPCHEM\1\METHODS\DEMOCAL2.M
Last changed    : 11/19/2013 9:58:47 AM by ZHOU
                  (modified after loading)
Analysis Method : C:\CHEM32\1\METHODS\DEF.LC.M
Last changed    : 3/19/2014 2:42:41 PM by Z
                  (modified after loading)
Sample Info     : OD-H, H/i-PrOH = 70/30, 0.70 mL/min, 30 oC, 254nm
  
```

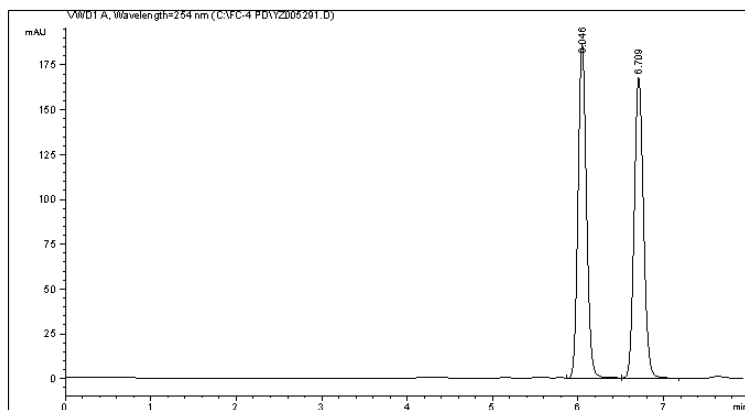

Area Percent Report

```

Sorted By      : Signal
Multiplier:    : 1.0000
Dilution:      : 1.0000
Use Multiplier & Dilution Factor with ISTDs
  
```

Signal 1: VWD1 A, Wavelength=254 nm

| Peak # | RetTime [min] | Type | Width [min] | Area mAU*s | Height [mAU] | Area %  |
|--------|---------------|------|-------------|------------|--------------|---------|
| 1      | 6.046         | VV   | 0.1065      | 1285.61963 | 186.70485    | 50.2416 |
| 2      | 6.709         | VB   | 0.1176      | 1273.25513 | 167.97606    | 49.7584 |

Totals : 2558.87476 354.68091

\*\*\* End of Report \*\*\*

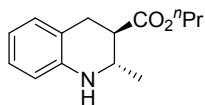

trans-(±)-8b

Data File C:\FC-4 PD\YZ005292.D  
 Sample Name: FC-6-25D1

```

=====
Acq. Operator   : ZHOU
Acq. Instrument : Instrument 1           Location : Vial 1
Injection Date  : 11/19/2013 1:07:26 PM
Acq. Method     : C:\HPCHEM\1\METHODS\DEMOCAL2.M
Last changed    : 11/19/2013 9:58:47 AM by ZHOU
                  (modified after loading)
Analysis Method : C:\CHEM32\1\METHODS\DEF.LC.M
Last changed    : 3/19/2014 2:42:41 PM by Z
                  (modified after loading)
Sample Info     : OD-H, H/i-PrOH = 70/30, 0.70 mL/min, 30 oC, 254nm
  
```

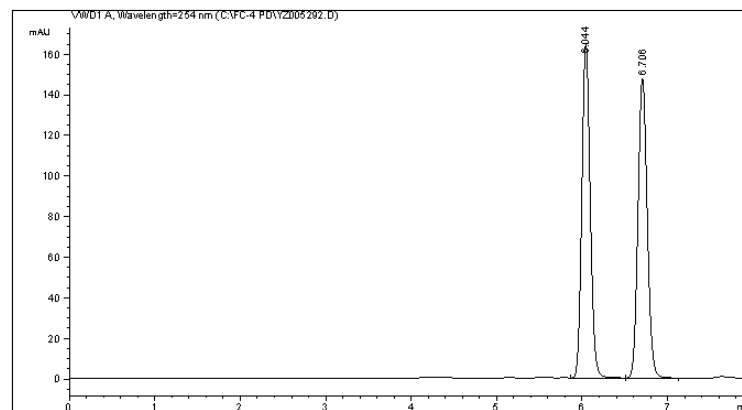

Area Percent Report

```

Sorted By      : Signal
Multiplier:    : 1.0000
Dilution:      : 1.0000
Use Multiplier & Dilution Factor with ISTDs
  
```

Signal 1: VWD1 A, Wavelength=254 nm

| Peak # | RetTime [min] | Type | Width [min] | Area mAU*s | Height [mAU] | Area %  |
|--------|---------------|------|-------------|------------|--------------|---------|
| 1      | 6.044         | VV   | 0.1059      | 1125.61145 | 164.82405    | 50.1961 |
| 2      | 6.706         | VB   | 0.1171      | 1116.81885 | 148.07527    | 49.8039 |

Totals : 2242.43030 312.89932

\*\*\* End of Report \*\*\*

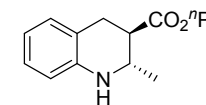

trans-8b

Data File C:\FC-2\YZ002464.D  
 Sample Name: FC-2-76E1

```

=====
Acq. Operator   : ZX
Acq. Instrument : Instrument 1           Location : Vial 1
Injection Date  : 6/19/2012 12:50:34 AM
Acq. Method     : C:\HPCHEM\1\METHODS\SW.M
Last changed    : 6/19/2012 12:48:57 AM by ZX
                  (modified after loading)
Analysis Method : C:\CHEM32\1\METHODS\DEF.LC.M
Last changed    : 10/9/2013 10:02:48 PM by B
                  (modified after loading)
Sample Info     : AD-H, H/i-PrOH = 80/20, 0.9mL/min, 30 oC, 254 nm
  
```

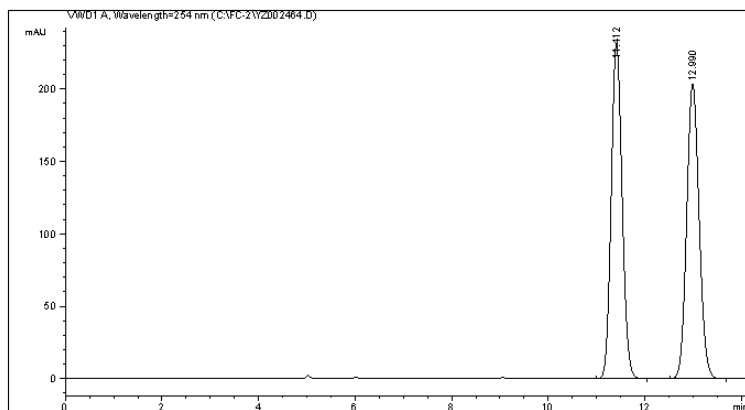

Area Percent Report

```

Sorted By      : Signal
Multiplier:    : 1.0000
Dilution:      : 1.0000
Use Multiplier & Dilution Factor with ISTDs
  
```

Signal 1: VWD1 A, Wavelength=254 nm

| Peak # | RetTime [min] | Type | Width [min] | Area mAU*s | Height [mAU] | Area %  |
|--------|---------------|------|-------------|------------|--------------|---------|
| 1      | 11.412        | BB   | 0.2448      | 3639.69067 | 231.25813    | 49.9645 |
| 2      | 12.990        | BB   | 0.2789      | 3644.86841 | 203.44264    | 50.0355 |

Totals : 7284.55908 434.70078

\*\*\* End of Report \*\*\*

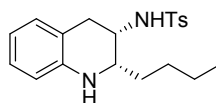

cis-(±)-9a

Data File C:\FC-4 PD\YZ005357.D  
 Sample Name: FC-6-44C1

```

=====
Acq. Operator   : ZHOU
Acq. Instrument : Instrument 1           Location : Vial 1
Injection Date   : 12/7/2013 2:13:58 PM
Acq. Method     : C:\HPCHEM\1\METHODS\DEHOCAL2.M
Last changed    : 12/7/2013 1:58:51 PM by ZHOU
                  (modified after loading)
Analysis Method : C:\CHEM32\1\METHODS\DEF.LC.M
Last changed    : 3/19/2014 2:59:08 PM by Z
                  (modified after loading)
Sample Info     : AD-H, H/i-PrOH = 80/20, 0.9 mL/min, 30 oC, 254 nm
  
```

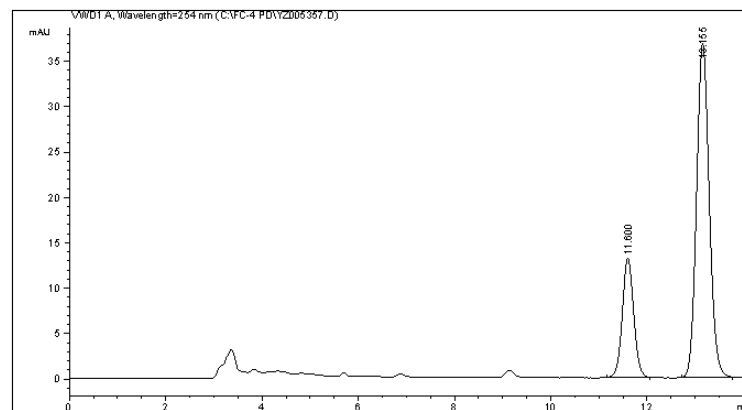

Area Percent Report

```

Sorted By      : Signal
Multiplier:    : 1.0000
Dilution:      : 1.0000
Use Multiplier & Dilution Factor with ISTDs
  
```

Signal 1: VWD1 A, Wavelength=254 nm

| Peak # | RetTime [min] | Type | Width [min] | Area mAU*s | Height [mAU] | Area %  |
|--------|---------------|------|-------------|------------|--------------|---------|
| 1      | 11.600        | BB   | 0.2548      | 217.51920  | 13.20103     | 24.3205 |
| 2      | 13.155        | BB   | 0.2845      | 676.86627  | 36.79735     | 75.6795 |

Totals : 894.38547 49.99838

\*\*\* End of Report \*\*\*

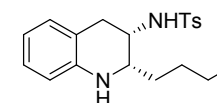

cis-(+)-9a

Data File C:\FC-3 CPAVYZ002493.D  
 Sample Name: FC-2-76E2

=====  
 Acq. Operator : ZX  
 Acq. Instrument : Instrument 1 Location : Vial 1  
 Injection Date : 6/19/2012 9:47:14 AM  
 Acq. Method : C:\HPCHEM\1\METHODS\SW.M  
 Last changed : 6/19/2012 9:44:21 AM by ZX  
 (modified after loading)  
 Analysis Method : C:\CHEM32\1\METHODS\DEF.LC.M  
 Last changed : 3/18/2014 3:00:15 PM by Z  
 (modified after loading)  
 Sample Info : AD-H, H/i-PrOH = 75/25, 0.8 mL/min, 30 oC, 254 nm

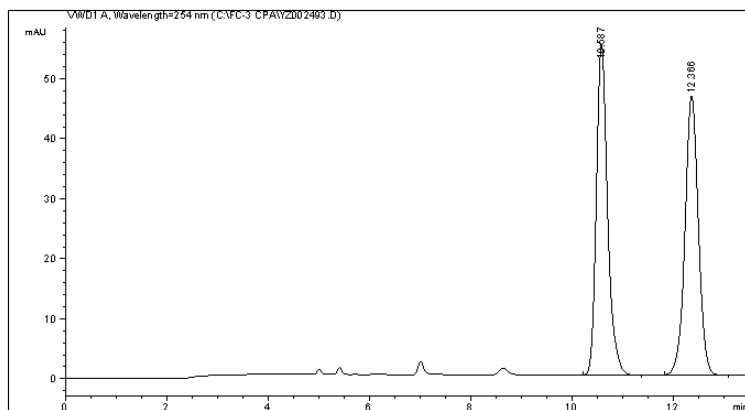

=====  
 Area Percent Report  
 =====

Sorted By : Signal  
 Multiplier: : 1.0000  
 Dilution: : 1.0000  
 Use Multiplier & Dilution Factor with ISTDs

Signal 1: VWD1 A, Wavelength=254 nm

| Peak # | RetTime [min] | Type | Width [min] | Area mAU*s | Height [mAU] | Area %  |
|--------|---------------|------|-------------|------------|--------------|---------|
| 1      | 10.587        | BB   | 0.2348      | 848.72638  | 55.16675     | 49.8889 |
| 2      | 12.366        | BB   | 0.2806      | 852.50793  | 46.54912     | 50.1111 |

Totals : 1701.23431 101.71587

=====  
 \*\*\* End of Report \*\*\*

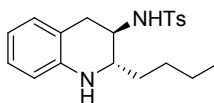

*trans-(±)-9b*

Data File C:\FC-4 PDVYZ005358.D  
 Sample Name: FC-6-44C2

=====  
 Acq. Operator : ZHOU  
 Acq. Instrument : Instrument 1 Location : Vial 1  
 Injection Date : 12/7/2013 2:31:46 PM  
 Acq. Method : C:\HPCHEM\1\METHODS\DEHOCAL2.M  
 Last changed : 12/7/2013 2:29:01 PM by ZHOU  
 (modified after loading)  
 Analysis Method : C:\CHEM32\1\METHODS\DEF.LC.M  
 Last changed : 3/19/2014 3:00:28 PM by Z  
 (modified after loading)  
 Sample Info : AD-H, H/i-PrOH = 75/25, 0.8 mL/min, 30 oC, 254 nm

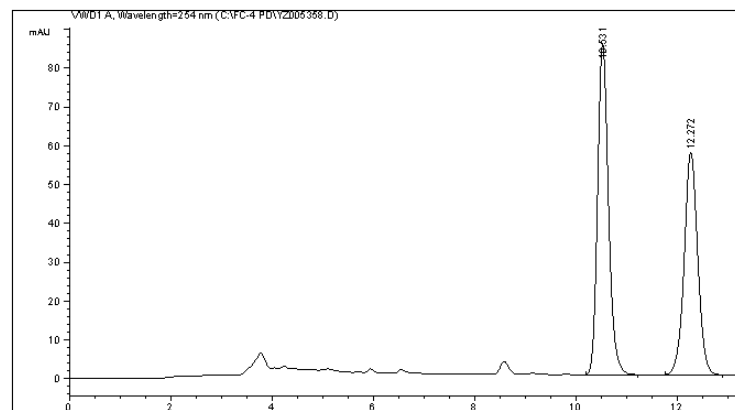

=====  
 Area Percent Report  
 =====

Sorted By : Signal  
 Multiplier: : 1.0000  
 Dilution: : 1.0000  
 Use Multiplier & Dilution Factor with ISTDs

Signal 1: VWD1 A, Wavelength=254 nm

| Peak # | RetTime [min] | Type | Width [min] | Area mAU*s | Height [mAU] | Area %  |
|--------|---------------|------|-------------|------------|--------------|---------|
| 1      | 10.531        | BB   | 0.2299      | 1275.60083 | 85.26829     | 54.5429 |
| 2      | 12.272        | BB   | 0.2819      | 1063.11169 | 57.30759     | 45.4571 |

Totals : 2338.71252 142.57587

=====  
 \*\*\* End of Report \*\*\*

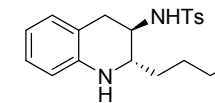

*trans-9b*

Data File C:\FC-4 PD\YZ005355.D  
 Sample Name: FC-6-44E

=====  
 Acq. Operator : ZHOU  
 Acq. Instrument : Instrument 1 Location : Vial 1  
 Injection Date : 12/7/2013 1:19:22 PM  
 Acq. Method : C:\HPCHEM\1\METHODS\DEMOCAL2.M  
 Last changed : 12/7/2013 12:58:33 PM by ZHOU  
 (modified after loading)  
 Analysis Method : C:\CHEM32\1\METHODS\DEF.LC.M  
 Last changed : 3/19/2014 2:55:15 PM by Z  
 (modified after loading)  
 Sample Info : OD-H, H/i-PrOH = 85/15, 0.7 mL/min, 30 oC, 254 nm

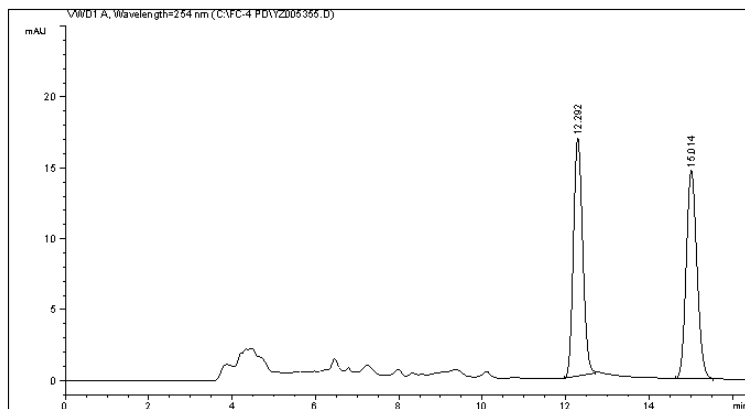

=====  
 Area Percent Report  
 =====

Sorted By : Signal  
 Multiplier: : 1.0000  
 Dilution: : 1.0000  
 Use Multiplier & Dilution Factor with ISTDs

Signal 1: VWD1 A, Wavelength=254 nm

| Peak # | RetTime [min] | Type | Width [min] | Area [mAU*s] | Height [mAU] | Area %  |
|--------|---------------|------|-------------|--------------|--------------|---------|
| 1      | 12.292        | BB   | 0.2398      | 258.86624    | 16.77034     | 49.6381 |
| 2      | 15.014        | BB   | 0.2769      | 262.64081    | 14.69664     | 50.3619 |

Totals : 521.50705 31.46698

=====  
 \*\*\* End of Report \*\*\*

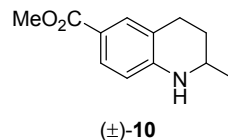

Data File C:\FC-4 PD\YZ005356.D  
 Sample Name: FC-6-44D

=====  
 Acq. Operator : ZHOU  
 Acq. Instrument : Instrument 1 Location : Vial 1  
 Injection Date : 12/7/2013 1:40:39 PM  
 Acq. Method : C:\HPCHEM\1\METHODS\DEMOCAL2.M  
 Last changed : 12/7/2013 12:58:33 PM by ZHOU  
 (modified after loading)  
 Analysis Method : C:\CHEM32\1\METHODS\DEF.LC.M  
 Last changed : 3/19/2014 2:52:34 PM by Z  
 (modified after loading)  
 Sample Info : OD-H, H/i-PrOH = 85/15, 0.7 mL/min, 30 oC, 254 nm

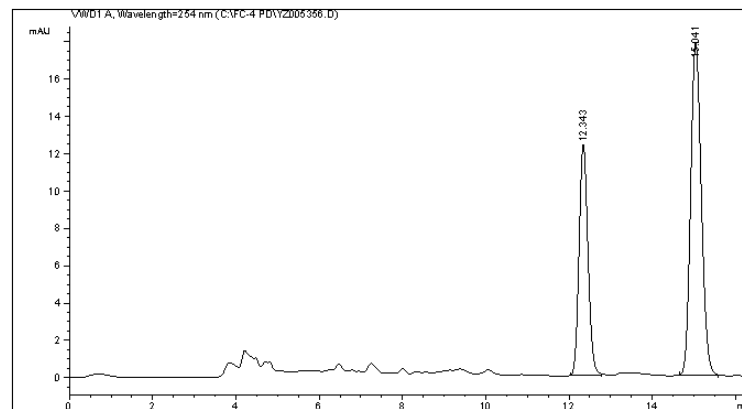

=====  
 Area Percent Report  
 =====

Sorted By : Signal  
 Multiplier: : 1.0000  
 Dilution: : 1.0000  
 Use Multiplier & Dilution Factor with ISTDs

Signal 1: VWD1 A, Wavelength=254 nm

| Peak # | RetTime [min] | Type | Width [min] | Area [mAU*s] | Height [mAU] | Area %  |
|--------|---------------|------|-------------|--------------|--------------|---------|
| 1      | 12.343        | BB   | 0.2291      | 182.49448    | 12.35686     | 36.4806 |
| 2      | 15.041        | BB   | 0.2781      | 317.75693    | 17.80739     | 63.5194 |

Totals : 500.25140 30.16425

=====  
 \*\*\* End of Report \*\*\*

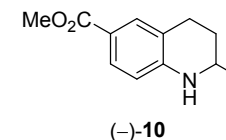

Supplement: c4cc04386c1.pdf [file c4cc04386c1.pdf]
